# Supplementary material for: Deep learning-based novel ensemble method with best score transferred-adaptive neuro fuzzy inference system for energy consumption prediction
Source: PeerJ journal article supplement (doi:10.7717/peerj-cs.2680), 2025-02-21
Supplement: Rttdsdatabase.zip [file Rttdsdatabase.zip]

## Sheet: PredTestV3
time	House overall	LSTM	CNN	RNN	GRU	Bi-LSTM
2016-05-20 05:00:00	0.475334	0.508083	0.618215	0.47611	0.467866	0.46794
2016-05-20 06:00:00	0.457087	0.487269	0.609702	0.45595	0.448876	0.449418
2016-05-20 07:00:00	0.510597	0.546727	0.637881	0.519254	0.502254	0.503226
2016-05-20 08:00:00	0.481241	0.510783	0.624219	0.49461	0.472869	0.473876
2016-05-20 09:00:00	0.443506	0.464294	0.61779	0.465298	0.434977	0.436228
2016-05-20 10:00:00	0.58414	0.614236	0.690995	0.603154	0.574052	0.577467
2016-05-20 11:00:00	0.801738	0.85804	0.914642	0.840083	0.790008	0.794657
2016-05-20 12:00:00	0.507664	0.555941	0.678854	0.540598	0.49938	0.500422
2016-05-20 13:00:00	0.378373	0.418985	0.594694	0.413048	0.372418	0.371523
2016-05-20 14:00:00	0.422471	0.448432	0.61248	0.451178	0.41545	0.415608
2016-05-20 15:00:00	0.827074	0.843008	0.91584	0.867451	0.814205	0.818447
2016-05-20 16:00:00	0.38793	0.419873	0.523325	0.393364	0.380857	0.381144
2016-05-20 17:00:00	0.268239	0.307789	0.49872	0.285115	0.262949	0.261551
2016-05-20 18:00:00	0.128779	0.177102	0.405591	0.151483	0.126131	0.122146
2016-05-20 19:00:00	0.836533	0.893697	0.95073	0.876391	0.826926	0.82801
2016-05-20 20:00:00	0.793124	0.823229	0.940764	0.842865	0.782303	0.782761
2016-05-20 21:00:00	0.390368	0.44286	0.565374	0.413979	0.380364	0.383571
2016-05-20 22:00:00	0.408157	0.45085	0.566233	0.43646	0.396798	0.400967
2016-05-20 23:00:00	0.352065	0.392328	0.567162	0.388046	0.34098	0.344581
2016-05-21	0.478706	0.526688	0.633289	0.474058	0.473391	0.47235
2016-05-21 01:00:00	0.497685	0.546527	0.643171	0.491483	0.491612	0.491175
2016-05-21 02:00:00	0.725662	0.793624	0.865979	0.729371	0.716036	0.718529
2016-05-21 03:00:00	0.492955	0.552837	0.643707	0.487983	0.486405	0.486475
2016-05-21 04:00:00	0.353817	0.395549	0.570791	0.358957	0.349012	0.347053
2016-05-21 05:00:00	0.529348	0.577035	0.660787	0.524813	0.52162	0.52283
2016-05-21 06:00:00	0.419728	0.451197	0.597955	0.419032	0.41301	0.412747
2016-05-21 07:00:00	0.388084	0.414575	0.583328	0.390968	0.381312	0.381016
2016-05-21 08:00:00	0.446585	0.477476	0.611862	0.449429	0.438719	0.439534
2016-05-21 09:00:00	0.369941	0.387573	0.575449	0.378621	0.362504	0.362655
2016-05-21 10:00:00	0.403301	0.422646	0.589093	0.411189	0.39534	0.39615
2016-05-21 11:00:00	0.364492	0.377316	0.555754	0.373914	0.356703	0.357337
2016-05-21 12:00:00	0.298863	0.305335	0.510994	0.317745	0.292584	0.292179
2016-05-21 13:00:00	0.316534	0.334894	0.525098	0.335792	0.310654	0.310087
2016-05-21 14:00:00	0.282106	0.291559	0.512248	0.29595	0.275697	0.275052
2016-05-21 15:00:00	0.260791	0.278521	0.485379	0.281447	0.254533	0.253948
2016-05-21 16:00:00	0.262279	0.284362	0.492546	0.27718	0.256096	0.25523
2016-05-21 17:00:00	0.230082	0.26853	0.484452	0.249189	0.224092	0.223407
2016-05-21 18:00:00	0.129616	0.170878	0.423092	0.158631	0.125132	0.122833
2016-05-21 19:00:00	0.305936	0.347517	0.513582	0.325361	0.297307	0.298755
2016-05-21 20:00:00	0.452537	0.512275	0.584295	0.472769	0.441259	0.445642
2016-05-21 21:00:00	0.287815	0.335806	0.500878	0.323863	0.278553	0.280444
2016-05-21 22:00:00	0.36556	0.419911	0.564154	0.393879	0.354935	0.358093
2016-05-21 23:00:00	0.479186	0.549622	0.63221	0.509139	0.46694	0.471949
2016-05-22	0.334069	0.388505	0.563981	0.346279	0.331446	0.327658
2016-05-22 01:00:00	0.402749	0.457785	0.594347	0.404732	0.398449	0.396297
2016-05-22 02:00:00	0.41818	0.46875	0.600968	0.418153	0.413265	0.411645
2016-05-22 03:00:00	0.346869	0.387782	0.569156	0.356698	0.342699	0.340074
2016-05-22 04:00:00	0.395356	0.438391	0.587278	0.400166	0.390185	0.388566
2016-05-22 05:00:00	0.443477	0.48967	0.612704	0.446099	0.437095	0.436711
2016-05-22 06:00:00	0.455539	0.496849	0.617208	0.467625	0.448096	0.44892
2016-05-22 07:00:00	0.411474	0.445413	0.596743	0.415798	0.404509	0.404492
2016-05-22 08:00:00	0.435706	0.471834	0.61046	0.441664	0.428049	0.428588
2016-05-22 09:00:00	0.333603	0.361865	0.561448	0.349252	0.326861	0.326319
2016-05-22 10:00:00	0.38208	0.412913	0.579025	0.393832	0.374623	0.375045
2016-05-22 11:00:00	0.354614	0.375794	0.542797	0.364591	0.347043	0.347446
2016-05-22 12:00:00	0.270267	0.292259	0.495491	0.293167	0.264247	0.263147
2016-05-22 13:00:00	0.359517	0.396805	0.541526	0.38109	0.352334	0.352848
2016-05-22 14:00:00	0.326112	0.365148	0.520646	0.347993	0.319239	0.319447
2016-05-22 15:00:00	0.138181	0.173119	0.434739	0.173157	0.134816	0.131563
2016-05-22 16:00:00	0.195603	0.239634	0.453921	0.223096	0.19121	0.188938
2016-05-22 17:00:00	0.0956503	0.146529	0.389659	0.127492	0.0934234	0.0893361
2016-05-22 18:00:00	0.0858536	0.136654	0.371995	0.119477	0.0836149	0.0793806
2016-05-22 19:00:00	0.219392	0.285444	0.464203	0.252232	0.21437	0.213203
2016-05-22 20:00:00	0.187216	0.230131	0.451926	0.226898	0.181586	0.180276
2016-05-22 21:00:00	0.226699	0.269608	0.471845	0.271438	0.219789	0.219706
2016-05-22 22:00:00	0.416104	0.459571	0.586419	0.44878	0.405164	0.408807
2016-05-22 23:00:00	0.493979	0.518543	0.667109	0.516926	0.480965	0.485931
2016-05-23	0.907989	0.928355	1.00238	0.890634	0.895861	0.901125
2016-05-23 01:00:00	0.994354	1.00034	1.09593	1.0297	0.983707	0.986345
2016-05-23 02:00:00	0.527776	0.559729	0.657646	0.529705	0.520999	0.519794
2016-05-23 03:00:00	0.461327	0.490135	0.616712	0.462733	0.45521	0.454331
2016-05-23 04:00:00	0.434734	0.460195	0.603413	0.436008	0.428083	0.427526
2016-05-23 05:00:00	0.39667	0.419702	0.584949	0.396812	0.38955	0.389162
2016-05-23 06:00:00	0.457753	0.484691	0.613316	0.462201	0.450328	0.450576
2016-05-23 07:00:00	0.437161	0.466067	0.604077	0.450834	0.429588	0.430137
2016-05-23 08:00:00	0.511515	0.543141	0.641403	0.521082	0.502622	0.504561
2016-05-23 09:00:00	0.736183	0.770638	0.825971	0.746343	0.724588	0.728763
2016-05-23 10:00:00	0.838026	0.856255	0.910773	0.847745	0.823493	0.830395
2016-05-23 11:00:00	0.814124	0.850539	0.893835	0.837391	0.800886	0.806889
2016-05-23 12:00:00	0.507532	0.528043	0.665107	0.526126	0.497977	0.499845
2016-05-23 13:00:00	0.422613	0.45291	0.578986	0.425501	0.415258	0.415567
2016-05-23 14:00:00	0.333398	0.364585	0.499111	0.333926	0.32719	0.326773
2016-05-23 15:00:00	0.184753	0.232558	0.467409	0.204176	0.181876	0.177954
2016-05-23 16:00:00	0.644269	0.683162	0.778097	0.651543	0.63254	0.636967
2016-05-23 17:00:00	0.164264	0.218769	0.413785	0.18251	0.160215	0.157742
2016-05-23 18:00:00	0.193378	0.260675	0.463308	0.217615	0.188498	0.186528
2016-05-23 19:00:00	0.369432	0.444378	0.542466	0.39267	0.360907	0.362067
2016-05-23 20:00:00	0.281167	0.352078	0.491964	0.313226	0.273123	0.273265
2016-05-23 21:00:00	0.500058	0.576848	0.614819	0.521406	0.488496	0.492836
2016-05-23 22:00:00	0.750068	0.818274	0.876354	0.76693	0.7344	0.741928
2016-05-23 23:00:00	0.64873	0.719825	0.792324	0.675495	0.634608	0.640971
2016-05-24	0.918254	0.960282	0.995049	0.898169	0.906661	0.911506
2016-05-24 01:00:00	1.457	1.46411	1.48224	1.4591	1.44281	1.44981
2016-05-24 02:00:00	0.945161	0.950152	1.03627	0.98578	0.934017	0.937271
2016-05-24 03:00:00	1.42743	1.41262	1.40183	1.38401	1.41587	1.41928
2016-05-24 04:00:00	1.01853	1.06316	1.10467	1.0213	1.00911	1.01152
2016-05-24 05:00:00	0.451911	0.486103	0.613357	0.457382	0.444864	0.445221
2016-05-24 06:00:00	0.40512	0.433573	0.59053	0.415427	0.398256	0.398238
2016-05-24 07:00:00	0.850641	0.869142	0.922098	0.840572	0.837396	0.843312
2016-05-24 08:00:00	0.449338	0.46357	0.606782	0.456278	0.440435	0.441796
2016-05-24 09:00:00	0.432688	0.459694	0.603471	0.454796	0.424876	0.425793
2016-05-24 10:00:00	0.356053	0.378437	0.570901	0.388792	0.348998	0.349126
2016-05-24 11:00:00	0.365939	0.387654	0.572756	0.395447	0.358311	0.358906
2016-05-24 12:00:00	0.359947	0.388741	0.547362	0.382842	0.35282	0.353133
2016-05-24 13:00:00	0.377006	0.399966	0.548707	0.406567	0.368625	0.370325
2016-05-24 14:00:00	0.385152	0.416286	0.566318	0.407798	0.376599	0.378193
2016-05-24 15:00:00	0.278595	0.30936	0.502223	0.305453	0.272171	0.271917
2016-05-24 16:00:00	0.278932	0.309605	0.502422	0.305249	0.271769	0.272019
2016-05-24 17:00:00	0.341985	0.375764	0.536354	0.364499	0.333084	0.334804
2016-05-24 18:00:00	0.254193	0.282385	0.48999	0.291292	0.246019	0.246758
2016-05-24 19:00:00	0.307203	0.344757	0.517208	0.33488	0.298981	0.300055
2016-05-24 20:00:00	0.294364	0.326862	0.505476	0.326251	0.286095	0.287341
2016-05-24 21:00:00	0.377467	0.413431	0.551027	0.413697	0.36776	0.370673
2016-05-24 22:00:00	0.422588	0.466094	0.585501	0.457668	0.41209	0.415388
2016-05-24 23:00:00	0.37459	0.403813	0.577767	0.417292	0.363749	0.367008
2016-05-25	0.540686	0.588758	0.695634	0.544442	0.536078	0.534448
2016-05-25 01:00:00	0.495442	0.534768	0.637421	0.504024	0.490665	0.48888
2016-05-25 02:00:00	0.601807	0.642293	0.785979	0.622347	0.594705	0.594553
2016-05-25 03:00:00	0.36669	0.402833	0.573354	0.384012	0.362554	0.359971
2016-05-25 04:00:00	0.335946	0.359725	0.560873	0.355751	0.331525	0.329145
2016-05-25 05:00:00	0.418878	0.452981	0.596127	0.434278	0.413073	0.412245
2016-05-25 06:00:00	0.39262	0.433706	0.585573	0.414393	0.384887	0.385389
2016-05-25 07:00:00	0.505194	0.547132	0.642862	0.552704	0.49502	0.49843
2016-05-25 08:00:00	0.427997	0.481925	0.60692	0.465069	0.418302	0.420592
2016-05-25 09:00:00	0.312599	0.354148	0.554361	0.359423	0.304349	0.30498
2016-05-25 10:00:00	0.467361	0.517247	0.623326	0.493883	0.456168	0.460064
2016-05-25 11:00:00	0.319574	0.352767	0.527149	0.370199	0.310793	0.312172
2016-05-25 12:00:00	0.270143	0.294694	0.496649	0.318921	0.263073	0.262889
2016-05-25 13:00:00	0.156573	0.187064	0.432694	0.190172	0.153709	0.15019
2016-05-25 14:00:00	0.0445389	0.0561698	0.348494	0.0780907	0.0442184	0.0381729
2016-05-25 15:00:00	0.0660867	0.0889086	0.346751	0.102405	0.0657354	0.059927
2016-05-25 16:00:00	0.0875178	0.11815	0.35746	0.127416	0.0866015	0.0816201
2016-05-25 17:00:00	0.0567983	0.0902993	0.353947	0.105297	0.0562808	0.0510751
2016-05-25 18:00:00	0.0731344	0.108429	0.347733	0.114162	0.0719386	0.0668001
2016-05-25 19:00:00	0.172084	0.207303	0.434188	0.219519	0.167638	0.165733
2016-05-25 20:00:00	0.178158	0.204241	0.444172	0.223514	0.173113	0.171306
2016-05-25 21:00:00	0.32854	0.345055	0.541905	0.369894	0.319154	0.321101
2016-05-25 22:00:00	0.266539	0.27853	0.524017	0.316902	0.257617	0.258946
2016-05-25 23:00:00	0.479046	0.525339	0.632776	0.514162	0.466224	0.471473
2016-05-26	0.461491	0.498769	0.620517	0.46754	0.456844	0.454699
2016-05-26 01:00:00	0.658309	0.710779	0.816096	0.672761	0.649884	0.650968
2016-05-26 02:00:00	0.335725	0.36115	0.559878	0.353188	0.332425	0.328942
2016-05-26 03:00:00	0.358045	0.389907	0.569265	0.386281	0.354055	0.351495
2016-05-26 04:00:00	0.388982	0.429258	0.582731	0.41168	0.384456	0.382338
2016-05-26 05:00:00	0.302683	0.33838	0.546936	0.334351	0.298703	0.295729
2016-05-26 06:00:00	0.380817	0.423789	0.580287	0.408602	0.375403	0.374065
2016-05-26 07:00:00	0.355581	0.393095	0.570364	0.388068	0.350037	0.348835
2016-05-26 08:00:00	0.394744	0.431955	0.589002	0.431349	0.388103	0.388256
2016-05-26 09:00:00	0.455394	0.508235	0.62239	0.484465	0.447477	0.448914
2016-05-26 10:00:00	0.278638	0.292247	0.532256	0.304552	0.272308	0.271546
2016-05-26 11:00:00	0.386087	0.417042	0.555628	0.400274	0.37845	0.379439
2016-05-26 12:00:00	0.30075	0.324051	0.510323	0.312154	0.294219	0.29401
2016-05-26 13:00:00	0.174543	0.208992	0.437772	0.190443	0.171094	0.168111
2016-05-26 14:00:00	0.0967228	0.150965	0.381415	0.124143	0.0956426	0.09079
2016-05-26 15:00:00	0.0688536	0.125925	0.36498	0.103333	0.0678191	0.0631548
2016-05-26 16:00:00	0.237476	0.303448	0.460503	0.260943	0.232513	0.231675
2016-05-26 17:00:00	0.136566	0.184657	0.407622	0.166834	0.13298	0.130354
2016-05-26 18:00:00	0.190233	0.237418	0.453517	0.231127	0.184669	0.18409
2016-05-26 19:00:00	0.276045	0.327676	0.500749	0.301763	0.268799	0.269468
2016-05-26 20:00:00	0.218756	0.262091	0.467969	0.260661	0.21182	0.212287
2016-05-26 21:00:00	0.377861	0.426767	0.55033	0.410825	0.367685	0.371067
2016-05-26 22:00:00	0.43106	0.472958	0.602134	0.457338	0.419352	0.423763
2016-05-26 23:00:00	0.373726	0.419325	0.577045	0.412985	0.362898	0.366693
2016-05-27	0.416508	0.458567	0.601423	0.421791	0.413646	0.410501
2016-05-27 01:00:00	0.435794	0.462094	0.605875	0.439272	0.431109	0.429408
2016-05-27 02:00:00	0.387227	0.416556	0.583288	0.392278	0.383255	0.380808
2016-05-27 03:00:00	0.359859	0.388431	0.57128	0.366175	0.355633	0.353333
2016-05-27 04:00:00	0.331449	0.360335	0.558575	0.345202	0.327374	0.324878
2016-05-27 05:00:00	0.593534	0.637819	0.701935	0.594882	0.58482	0.587246
2016-05-27 06:00:00	0.383859	0.42709	0.580725	0.409003	0.378105	0.377625
2016-05-27 07:00:00	0.437011	0.482773	0.60863	0.454029	0.430167	0.430618
2016-05-27 08:00:00	0.477133	0.516727	0.624722	0.489851	0.468911	0.47043
2016-05-27 09:00:00	0.399195	0.43767	0.587824	0.420951	0.391952	0.39271
2016-05-27 10:00:00	0.373374	0.41033	0.573367	0.392166	0.366525	0.36669
2016-05-27 11:00:00	0.317426	0.347835	0.521717	0.336176	0.310842	0.310556
2016-05-27 12:00:00	0.294437	0.340055	0.518511	0.314394	0.288611	0.287932
2016-05-27 13:00:00	0.171963	0.224973	0.448056	0.19657	0.168924	0.165772
2016-05-27 14:00:00	0.269602	0.340351	0.483871	0.290555	0.264579	0.263751
2016-05-27 15:00:00	0.359399	0.433899	0.54943	0.381839	0.352185	0.353251
2016-05-27 16:00:00	0.0944489	0.167329	0.390549	0.136323	0.0922972	0.0884296
2016-05-27 17:00:00	0.28108	0.358634	0.488828	0.302615	0.275041	0.274807
2016-05-27 18:00:00	0.24109	0.310213	0.46334	0.270621	0.235336	0.234821
2016-05-27 19:00:00	0.187484	0.243702	0.44885	0.226054	0.182158	0.180917
2016-05-27 20:00:00	0.279669	0.348016	0.500766	0.3117	0.273243	0.273333
2016-05-27 21:00:00	0.393913	0.43197	0.545166	0.4263	0.383546	0.386783
2016-05-27 22:00:00	0.391638	0.439832	0.580015	0.42476	0.381725	0.384463
2016-05-27 23:00:00	0.396636	0.444683	0.588776	0.435304	0.386207	0.389493
2016-05-28	0.519468	0.563635	0.651188	0.521619	0.514956	0.513515
2016-05-28 01:00:00	0.388766	0.429433	0.583575	0.396973	0.385985	0.382558
2016-05-28 02:00:00	0.320036	0.353863	0.559094	0.338934	0.317393	0.313565
2016-05-28 03:00:00	0.482613	0.525293	0.631125	0.487994	0.47689	0.476126
2016-05-28 04:00:00	0.443308	0.490609	0.610317	0.462263	0.437532	0.437293
2016-05-28 05:00:00	0.431861	0.483218	0.604574	0.447207	0.426028	0.425561
2016-05-28 06:00:00	0.54223	0.595986	0.660187	0.552759	0.534384	0.535846
2016-05-28 07:00:00	0.353507	0.39259	0.567845	0.378556	0.347825	0.346951
2016-05-28 08:00:00	0.434245	0.478433	0.607759	0.452825	0.427282	0.427629
2016-05-28 09:00:00	0.402931	0.434246	0.592228	0.420177	0.395467	0.395921
2016-05-28 10:00:00	0.353088	0.389661	0.567776	0.372388	0.346544	0.346359
2016-05-28 11:00:00	0.344194	0.379899	0.561967	0.361974	0.337457	0.337416
2016-05-28 12:00:00	0.411181	0.450032	0.562117	0.425825	0.403073	0.404638
2016-05-28 13:00:00	0.285378	0.352579	0.510115	0.30565	0.281077	0.279553
2016-05-28 14:00:00	0.0607689	0.114645	0.363546	0.092758	0.06062	0.0548009
2016-05-28 15:00:00	0.0826931	0.136524	0.357001	0.114881	0.0824661	0.0768036
2016-05-28 16:00:00	0.172372	0.242377	0.424551	0.198561	0.169669	0.166808
2016-05-28 17:00:00	0.138058	0.191655	0.411063	0.173036	0.134978	0.131991
2016-05-28 18:00:00	0.182859	0.253408	0.432391	0.216144	0.179472	0.176948
2016-05-28 19:00:00	0.178362	0.220526	0.431779	0.210515	0.173605	0.171734
2016-05-28 20:00:00	0.273547	0.326834	0.501229	0.30766	0.267419	0.267214
2016-05-28 21:00:00	0.320596	0.357674	0.51637	0.358678	0.312449	0.313791
2016-05-28 22:00:00	0.446223	0.481172	0.579441	0.476807	0.43556	0.439045
2016-05-28 23:00:00	0.472056	0.521828	0.628547	0.5099	0.460996	0.464989
2016-05-29	0.359009	0.397751	0.570283	0.379426	0.357579	0.35277
2016-05-29 01:00:00	0.560739	0.613715	0.674139	0.565827	0.555473	0.554395
2016-05-29 02:00:00	0.382549	0.426626	0.580393	0.409233	0.379389	0.376228
2016-05-29 03:00:00	0.415121	0.455765	0.594811	0.442288	0.410342	0.408353
2016-05-29 04:00:00	0.343762	0.378045	0.563051	0.377441	0.339359	0.336911
2016-05-29 05:00:00	0.565294	0.610112	0.675598	0.584431	0.556496	0.558733
2016-05-29 06:00:00	0.458859	0.503446	0.621143	0.484748	0.451269	0.452165
2016-05-29 07:00:00	0.444457	0.48503	0.615049	0.470703	0.435903	0.437524
2016-05-29 08:00:00	0.547236	0.584909	0.66896	0.564071	0.537039	0.540074
2016-05-29 09:00:00	0.3357	0.361841	0.561583	0.377459	0.328707	0.32854
2016-05-29 10:00:00	0.451778	0.490086	0.615412	0.480347	0.442856	0.444824
2016-05-29 11:00:00	0.456849	0.483595	0.580972	0.47529	0.447978	0.449823
2016-05-29 12:00:00	0.301929	0.333311	0.508116	0.328979	0.295989	0.295092
2016-05-29 13:00:00	0.216946	0.267362	0.458214	0.248783	0.214047	0.210736
2016-05-29 14:00:00	0.174779	0.207353	0.411145	0.210791	0.172208	0.168476
2016-05-29 15:00:00	0.154734	0.192724	0.424319	0.195332	0.152722	0.148291
2016-05-29 16:00:00	0.099805	0.122733	0.384367	0.140367	0.0981079	0.0933104
2016-05-29 17:00:00	0.186097	0.229433	0.430761	0.226138	0.182984	0.180084
2016-05-29 18:00:00	0.49397	0.521695	0.60466	0.520263	0.483286	0.487022
2016-05-29 19:00:00	0.310593	0.330617	0.505674	0.349523	0.302415	0.303569
2016-05-29 20:00:00	0.254073	0.294153	0.479913	0.296582	0.248333	0.247275
2016-05-29 21:00:00	0.382664	0.403606	0.551882	0.422218	0.372995	0.375717
2016-05-29 22:00:00	0.409046	0.450294	0.56975	0.450708	0.398929	0.401715
2016-05-29 23:00:00	0.415781	0.463245	0.594783	0.463512	0.4049	0.408497
2016-05-30	0.517451	0.556473	0.649493	0.531191	0.513133	0.511288
2016-05-30 01:00:00	0.41429	0.463538	0.59899	0.438899	0.411581	0.407972
2016-05-30 02:00:00	0.411054	0.462605	0.594519	0.441232	0.407616	0.404786
2016-05-30 03:00:00	0.513096	0.560259	0.653809	0.540007	0.507409	0.50662
2016-05-30 04:00:00	0.314007	0.344455	0.558704	0.354111	0.310782	0.307549
2016-05-30 05:00:00	0.447455	0.492271	0.623735	0.482881	0.441783	0.441171
2016-05-30 06:00:00	0.483956	0.524986	0.641374	0.521217	0.476594	0.477914
2016-05-30 07:00:00	0.503508	0.539	0.648793	0.528062	0.49528	0.496952
2016-05-30 08:00:00	0.477779	0.526709	0.633007	0.503151	0.47024	0.471277
2016-05-30 09:00:00	0.36253	0.398721	0.573249	0.397116	0.356017	0.355928
2016-05-30 10:00:00	0.510695	0.557874	0.65089	0.524325	0.501536	0.503796
2016-05-30 11:00:00	0.368929	0.400615	0.577615	0.385618	0.36047	0.362152
2016-05-30 12:00:00	0.410014	0.458563	0.595618	0.423844	0.400946	0.403358
2016-05-30 13:00:00	0.353622	0.407599	0.533638	0.367115	0.345808	0.346886
2016-05-30 14:00:00	0.25255	0.319079	0.481844	0.28139	0.247022	0.246347
2016-05-30 15:00:00	0.130118	0.206657	0.410341	0.163074	0.12785	0.124136
2016-05-30 16:00:00	0.169255	0.231584	0.428706	0.197852	0.164829	0.162787
2016-05-30 17:00:00	0.102827	0.186032	0.385335	0.141194	0.10075	0.0970737
2016-05-30 18:00:00	0.160909	0.236832	0.422951	0.200272	0.157342	0.155328
2016-05-30 19:00:00	0.26946	0.322303	0.495537	0.307738	0.262978	0.263319
2016-05-30 20:00:00	0.292562	0.33718	0.50786	0.325539	0.28584	0.28591
2016-05-30 21:00:00	0.29895	0.329067	0.515691	0.348498	0.290914	0.292323
2016-05-30 22:00:00	0.423038	0.466086	0.581858	0.463387	0.412987	0.415935
2016-05-30 23:00:00	0.476182	0.517581	0.620255	0.51712	0.464323	0.468823
2016-05-31	0.415548	0.455475	0.598627	0.434134	0.413225	0.409332
2016-05-31 01:00:00	0.425517	0.473985	0.60169	0.447481	0.42257	0.419312
2016-05-31 02:00:00	0.507391	0.553786	0.638775	0.526343	0.502289	0.501069
2016-05-31 03:00:00	0.395845	0.440192	0.58574	0.421058	0.392257	0.389258
2016-05-31 04:00:00	0.313368	0.352261	0.555307	0.341474	0.30971	0.306375
2016-05-31 05:00:00	0.427873	0.476546	0.60345	0.452563	0.421757	0.420884
2016-05-31 06:00:00	0.490003	0.538006	0.633189	0.515597	0.481724	0.483133
2016-05-31 07:00:00	0.508285	0.560145	0.650928	0.541266	0.49963	0.501677
2016-05-31 08:00:00	0.425936	0.472263	0.605725	0.454575	0.418381	0.419062
2016-05-31 09:00:00	0.495657	0.533793	0.634616	0.521912	0.486336	0.488753
2016-05-31 10:00:00	0.407589	0.440492	0.592645	0.438303	0.400365	0.40068
2016-05-31 11:00:00	0.284207	0.301822	0.495422	0.322568	0.278708	0.277305
2016-05-31 12:00:00	0.469902	0.492287	0.594886	0.490328	0.461228	0.462983
2016-05-31 13:00:00	0.137594	0.163648	0.418071	0.173465	0.134623	0.130725
2016-05-31 14:00:00	0.0668044	0.0946707	0.354627	0.104322	0.0655302	0.0602043
2016-05-31 15:00:00	0.143556	0.167085	0.399327	0.172393	0.14022	0.136734
2016-05-31 16:00:00	0.0770258	0.0888192	0.359273	0.118455	0.0745045	0.0704142
2016-05-31 17:00:00	0.148938	0.20997	0.417584	0.196253	0.145325	0.142672
2016-05-31 18:00:00	0.129606	0.191861	0.406009	0.176877	0.125403	0.123055
2016-05-31 19:00:00	0.450678	0.521309	0.733154	0.49669	0.438946	0.442031
2016-05-31 20:00:00	0.180465	0.217804	0.45038	0.225179	0.174584	0.173566
2016-05-31 21:00:00	0.309534	0.35202	0.520806	0.368489	0.301054	0.302829
2016-05-31 22:00:00	0.523205	0.578272	0.630118	0.572098	0.51153	0.516102
2016-05-31 23:00:00	0.554008	0.620912	0.70253	0.61249	0.54188	0.546749
2016-06-01	1.24159	1.33058	1.27242	1.25192	1.23185	1.23509
2016-06-01 01:00:00	1.08948	1.13715	1.14738	1.08198	1.07897	1.08158
2016-06-01 02:00:00	1.02899	1.04693	1.08068	1.02869	1.0184	1.02127
2016-06-01 03:00:00	0.531803	0.573804	0.683626	0.523234	0.526225	0.524394
2016-06-01 04:00:00	0.391208	0.43281	0.583264	0.39744	0.387543	0.384208
2016-06-01 05:00:00	0.498948	0.538669	0.635226	0.491653	0.492505	0.491703
2016-06-01 06:00:00	0.335868	0.363538	0.561033	0.346003	0.331868	0.328734
2016-06-01 07:00:00	0.536148	0.574339	0.666853	0.52797	0.529135	0.529407
2016-06-01 08:00:00	0.520102	0.540252	0.649559	0.513574	0.512164	0.513099
2016-06-01 09:00:00	0.444261	0.473024	0.609018	0.4359	0.437717	0.436932
2016-06-01 10:00:00	0.869031	0.914171	1.02202	0.868666	0.857754	0.861534
2016-06-01 11:00:00	1.14376	1.17741	1.18459	1.14092	1.12947	1.13702
2016-06-01 12:00:00	0.63135	0.686005	0.741789	0.618628	0.621781	0.623519
2016-06-01 13:00:00	0.164879	0.22705	0.441346	0.185478	0.164203	0.157415
2016-06-01 14:00:00	0.366793	0.438763	0.565032	0.361836	0.362876	0.359629
2016-06-01 15:00:00	0.0688053	0.134178	0.374582	0.0971442	0.0705099	0.0628191
2016-06-01 16:00:00	0.0567828	0.137698	0.363589	0.0872644	0.059207	0.0511124
2016-06-01 17:00:00	0.102623	0.179291	0.384253	0.130552	0.103753	0.0968858
2016-06-01 18:00:00	0.215073	0.258376	0.43884	0.226264	0.212744	0.208466
2016-06-01 19:00:00	0.150055	0.194082	0.417448	0.176245	0.149747	0.143526
2016-06-01 20:00:00	0.206876	0.228263	0.460662	0.238319	0.204072	0.200331
2016-06-01 21:00:00	0.430809	0.450609	0.593848	0.444197	0.423659	0.423267
2016-06-01 22:00:00	0.514072	0.544769	0.671894	0.54055	0.505679	0.506999
2016-06-01 23:00:00	0.65031	0.686481	0.792529	0.665784	0.639974	0.642449
2016-06-02	1.16938	1.19255	1.17017	1.11149	1.15905	1.16391
2016-06-02 01:00:00	1.25297	1.31265	1.2949	1.26351	1.24476	1.24573
2016-06-02 02:00:00	1.20655	1.25728	1.21203	1.20694	1.19751	1.19908
2016-06-02 03:00:00	0.953309	0.990854	1.03049	0.915054	0.941133	0.946209
2016-06-02 04:00:00	0.333405	0.359075	0.562596	0.337425	0.330049	0.326207
2016-06-02 05:00:00	0.553929	0.596933	0.675948	0.549637	0.547229	0.547058
2016-06-02 06:00:00	0.318843	0.34276	0.554404	0.329409	0.315213	0.311772
2016-06-02 07:00:00	0.473211	0.503301	0.635096	0.469877	0.466785	0.466099
2016-06-02 08:00:00	0.46356	0.496655	0.624485	0.460117	0.456883	0.456625
2016-06-02 09:00:00	0.383746	0.412749	0.586391	0.388647	0.377773	0.376687
2016-06-02 10:00:00	0.438063	0.473667	0.613964	0.436864	0.431022	0.431
2016-06-02 11:00:00	0.674572	0.702201	0.786216	0.656978	0.663093	0.666499
2016-06-02 12:00:00	0.83308	0.883933	0.949761	0.821368	0.819929	0.825842
2016-06-02 13:00:00	0.272257	0.312096	0.489749	0.267304	0.268736	0.26506
2016-06-02 14:00:00	0.196064	0.261697	0.420994	0.187717	0.194782	0.188663
2016-06-02 15:00:00	0.13563	0.191133	0.406946	0.148851	0.136066	0.128765
2016-06-02 16:00:00	0.132432	0.172762	0.400235	0.107546	0.132676	0.126286
2016-06-02 17:00:00	0.217401	0.247418	0.451477	0.203331	0.214924	0.209914
2016-06-02 18:00:00	0.112065	0.137756	0.368819	0.133763	0.111925	0.104759
2016-06-02 19:00:00	0.307204	0.339587	0.517551	0.323997	0.303582	0.299902
2016-06-02 20:00:00	0.19827	0.209829	0.440762	0.224575	0.195424	0.190506
2016-06-02 21:00:00	0.477713	0.494025	0.618043	0.490861	0.469998	0.469917
2016-06-02 22:00:00	0.528202	0.545218	0.671698	0.546749	0.51921	0.519934
2016-06-02 23:00:00	0.591962	0.606989	0.733848	0.60999	0.581835	0.584089
2016-06-03	0.498458	0.536198	0.666339	0.486904	0.494639	0.49049
2016-06-03 01:00:00	0.804206	0.80253	0.950362	0.809722	0.796069	0.796329
2016-06-03 02:00:00	0.911534	0.908151	0.999079	0.894452	0.901504	0.904189
2016-06-03 03:00:00	1.06255	1.10729	1.10873	1.08726	1.05431	1.05476
2016-06-03 04:00:00	0.905241	0.930718	1.04777	0.913145	0.897095	0.897526
2016-06-03 05:00:00	0.551111	0.547845	0.681067	0.485496	0.544728	0.544938
2016-06-03 06:00:00	0.483834	0.50412	0.634588	0.470337	0.47745	0.476848
2016-06-03 07:00:00	0.414728	0.430434	0.597721	0.419739	0.40876	0.407925
2016-06-03 08:00:00	0.424816	0.444428	0.603436	0.418741	0.418695	0.417721
2016-06-03 09:00:00	0.367947	0.380703	0.576553	0.368015	0.362258	0.360683
2016-06-03 10:00:00	0.448094	0.4641	0.614664	0.443813	0.440848	0.441065
2016-06-03 11:00:00	0.670389	0.697433	0.799189	0.65622	0.660061	0.662633
2016-06-03 12:00:00	0.735669	0.759829	0.844515	0.727251	0.724398	0.728571
2016-06-03 13:00:00	0.407653	0.421408	0.59666	0.404642	0.401457	0.400429
2016-06-03 14:00:00	0.519385	0.511141	0.614202	0.492979	0.510362	0.511877
2016-06-03 15:00:00	0.488188	0.471892	0.596329	0.465401	0.479197	0.480378
2016-06-03 16:00:00	0.78464	0.786597	0.868366	0.781098	0.772688	0.776783
2016-06-03 17:00:00	0.623861	0.630176	0.743788	0.626466	0.613691	0.616281
2016-06-03 18:00:00	0.262885	0.270996	0.492421	0.282745	0.258484	0.255791
2016-06-03 19:00:00	0.236362	0.241491	0.475512	0.265491	0.231922	0.228995
2016-06-03 20:00:00	0.400279	0.417174	0.566787	0.417326	0.393184	0.393284
2016-06-03 21:00:00	0.343724	0.357112	0.531225	0.361592	0.337669	0.336038
2016-06-03 22:00:00	0.545984	0.573362	0.694129	0.568002	0.537081	0.538561
2016-06-03 23:00:00	0.409481	0.423866	0.588396	0.434254	0.401551	0.401782
2016-06-04	0.569584	0.610404	0.678752	0.548976	0.564846	0.562915
2016-06-04 01:00:00	0.874738	0.889516	1.01554	0.882004	0.866598	0.866519
2016-06-04 02:00:00	0.587072	0.620078	0.738775	0.566031	0.581302	0.579776
2016-06-04 03:00:00	0.458054	0.483412	0.615845	0.444486	0.453678	0.451191
2016-06-04 04:00:00	0.693172	0.720064	0.879696	0.684251	0.684203	0.685247
2016-06-04 05:00:00	0.512083	0.533868	0.650628	0.498487	0.505566	0.505558
2016-06-04 06:00:00	0.311674	0.309686	0.55196	0.31974	0.307665	0.304386
2016-06-04 07:00:00	0.480766	0.497791	0.636743	0.469105	0.473833	0.473962
2016-06-04 08:00:00	0.338743	0.334245	0.566911	0.34372	0.333159	0.331443
2016-06-04 09:00:00	0.449547	0.460914	0.61989	0.44122	0.442097	0.442592
2016-06-04 10:00:00	0.402929	0.411643	0.59418	0.399755	0.396059	0.395942
2016-06-04 11:00:00	0.402411	0.414638	0.603259	0.408594	0.395609	0.395133
2016-06-04 12:00:00	0.610481	0.651161	0.769553	0.604892	0.601266	0.603494
2016-06-04 13:00:00	0.575883	0.579767	0.652994	0.544212	0.565986	0.568533
2016-06-04 14:00:00	0.740311	0.752096	0.860909	0.698771	0.728136	0.733365
2016-06-04 15:00:00	0.578312	0.598218	0.676727	0.542814	0.568556	0.571023
2016-06-04 16:00:00	0.682036	0.716819	0.786441	0.649472	0.671646	0.675358
2016-06-04 17:00:00	0.502226	0.541622	0.648643	0.490617	0.494618	0.494983
2016-06-04 18:00:00	0.275971	0.322481	0.523817	0.277693	0.272707	0.269497
2016-06-04 19:00:00	1.41886	1.41627	1.35959	1.42573	1.40974	1.413
2016-06-04 20:00:00	1.56877	1.55248	1.50252	1.55161	1.5612	1.56274
2016-06-04 21:00:00	1.12311	1.15535	1.28297	1.134	1.11095	1.11741
2016-06-04 22:00:00	1.16873	1.18684	1.21626	1.15942	1.15531	1.16206
2016-06-04 23:00:00	1.11092	1.14908	1.13055	1.06389	1.09692	1.10472
2016-06-05	2.4021	2.39876	2.38737	2.37891	2.39365	2.40182
2016-06-05 01:00:00	1.74838	1.75708	1.70714	1.70727	1.73566	1.74451
2016-06-05 02:00:00	1.61064	1.6015	1.47619	1.58536	1.59615	1.60665
2016-06-05 03:00:00	1.46064	1.45633	1.4041	1.41776	1.44595	1.45513
2016-06-05 04:00:00	0.955811	0.967568	1.03483	0.906555	0.943038	0.948841
2016-06-05 05:00:00	0.565797	0.585143	0.709125	0.53798	0.557633	0.558612
2016-06-05 06:00:00	0.377962	0.399402	0.582338	0.366909	0.372553	0.370912
2016-06-05 07:00:00	0.508681	0.536492	0.647878	0.490147	0.500699	0.501896
2016-06-05 08:00:00	0.510401	0.541365	0.653068	0.497826	0.501999	0.503772
2016-06-05 09:00:00	0.379344	0.398143	0.583721	0.370488	0.372461	0.37215
2016-06-05 10:00:00	0.428036	0.458695	0.606798	0.42017	0.420055	0.421084
2016-06-05 11:00:00	0.377469	0.407355	0.582957	0.375334	0.370018	0.370386
2016-06-05 12:00:00	0.345348	0.373685	0.564229	0.346603	0.338427	0.338271
2016-06-05 13:00:00	0.893166	0.963324	0.986694	0.887958	0.880955	0.886336
2016-06-05 14:00:00	0.559398	0.61479	0.702098	0.547481	0.550007	0.552251
2016-06-05 15:00:00	0.615079	0.64348	0.683019	0.59412	0.603827	0.607828
2016-06-05 16:00:00	0.918893	0.92573	1.01808	0.878607	0.904018	0.911199
2016-06-05 17:00:00	1.26817	1.28325	1.32009	1.24199	1.25344	1.26179
2016-06-05 18:00:00	1.33517	1.34157	1.33783	1.31315	1.32047	1.32907
2016-06-05 19:00:00	0.945193	0.964208	1.02299	0.925291	0.931565	0.937817
2016-06-05 20:00:00	1.03082	1.04758	1.08904	1.01189	1.01711	1.02385
2016-06-05 21:00:00	2.37223	2.34952	2.5181	2.36196	2.36702	2.36918
2016-06-05 22:00:00	2.27701	2.27316	2.40719	2.27714	2.27004	2.27416
2016-06-05 23:00:00	1.09504	1.1197	1.13202	1.10556	1.08038	1.08749
2016-06-06	1.24102	1.29651	1.2639	1.23137	1.23013	1.23482
2016-06-06 01:00:00	1.2289	1.24715	1.2626	1.20416	1.21765	1.22259
2016-06-06 02:00:00	0.94978	0.971236	1.03947	0.930822	0.939872	0.942041
2016-06-06 03:00:00	1.45598	1.45789	1.40106	1.408	1.44624	1.44871
2016-06-06 04:00:00	1.03794	1.04389	1.07938	1.02044	1.02844	1.02828
2016-06-06 05:00:00	0.507201	0.550637	0.644212	0.491015	0.501147	0.500395
2016-06-06 06:00:00	0.434845	0.479469	0.607822	0.409459	0.428923	0.427267
2016-06-06 07:00:00	0.428658	0.471904	0.605145	0.422261	0.421685	0.421145
2016-06-06 08:00:00	0.447519	0.488447	0.609797	0.429153	0.438485	0.439259
2016-06-06 09:00:00	0.499729	0.529215	0.633512	0.492558	0.489775	0.492072
2016-06-06 10:00:00	0.490713	0.521091	0.641594	0.508864	0.482107	0.482844
2016-06-06 11:00:00	0.875929	0.920354	0.946877	0.875101	0.862785	0.869017
2016-06-06 12:00:00	0.69201	0.728896	0.793504	0.695685	0.679991	0.683948
2016-06-06 13:00:00	0.642179	0.693434	0.798598	0.649023	0.633145	0.634696
2016-06-06 14:00:00	0.326082	0.366179	0.501486	0.318293	0.321817	0.318514
2016-06-06 15:00:00	0.105339	0.142282	0.365577	0.128528	0.105625	0.0982891
2016-06-06 16:00:00	0.502545	0.518242	0.630837	0.488061	0.494795	0.495308
2016-06-06 17:00:00	0.510635	0.522224	0.616956	0.511814	0.502197	0.503302
2016-06-06 18:00:00	0.278102	0.283254	0.472692	0.297851	0.273278	0.271161
2016-06-06 19:00:00	0.182021	0.202703	0.433435	0.22846	0.179725	0.175845
2016-06-06 20:00:00	0.247818	0.254469	0.49451	0.304337	0.242544	0.240975
2016-06-06 21:00:00	0.734166	0.766183	0.878509	0.775503	0.723779	0.72733
2016-06-06 22:00:00	1.00405	1.02623	1.15506	1.06732	0.991107	0.997166
2016-06-06 23:00:00	1.58884	1.56132	1.53509	1.58215	1.57384	1.58131
2016-06-07	0.789593	0.823286	0.900604	0.776955	0.781293	0.783088
2016-06-07 01:00:00	0.980611	0.990484	1.07477	0.981246	0.969928	0.972202
2016-06-07 02:00:00	0.902454	0.894874	1.0261	0.869427	0.892817	0.894543
2016-06-07 03:00:00	1.49498	1.5041	1.46324	1.53542	1.4843	1.48932
2016-06-07 04:00:00	0.967549	0.979617	1.07464	0.98886	0.957615	0.959992
2016-06-07 05:00:00	0.431038	0.433848	0.606597	0.429048	0.42434	0.424284
2016-06-07 06:00:00	0.374787	0.370752	0.582033	0.372605	0.368583	0.367739
2016-06-07 07:00:00	0.388068	0.389865	0.587747	0.384422	0.381827	0.380946
2016-06-07 08:00:00	0.379176	0.376834	0.582869	0.377023	0.372714	0.371975
2016-06-07 09:00:00	0.366761	0.365189	0.576877	0.367245	0.360234	0.359499
2016-06-07 10:00:00	0.380485	0.381387	0.57923	0.378876	0.373738	0.373302
2016-06-07 11:00:00	0.760923	0.793111	0.887797	0.761254	0.749325	0.753586
2016-06-07 12:00:00	0.760188	0.783093	0.866054	0.748517	0.748435	0.753383
2016-06-07 13:00:00	0.395447	0.435452	0.573304	0.394878	0.389646	0.388125
2016-06-07 14:00:00	0.136368	0.176272	0.400631	0.157176	0.135831	0.129028
2016-06-07 15:00:00	0.576077	0.599008	0.629971	0.54334	0.566842	0.568841
2016-06-07 16:00:00	0.262055	0.277081	0.442465	0.255487	0.257637	0.254878
2016-06-07 17:00:00	0.133361	0.174342	0.390043	0.158983	0.132886	0.127353
2016-06-07 18:00:00	0.234334	0.253512	0.471702	0.252255	0.230282	0.227388
2016-06-07 19:00:00	0.486563	0.531215	0.673909	0.49061	0.478999	0.479912
2016-06-07 20:00:00	0.265322	0.283025	0.490081	0.283185	0.26075	0.258209
2016-06-07 21:00:00	0.395843	0.407662	0.561195	0.417366	0.387635	0.38835
2016-06-07 22:00:00	0.974188	0.977544	1.06109	0.966525	0.958901	0.966359
2016-06-07 23:00:00	1.08092	1.10099	1.19288	1.09397	1.06585	1.07332
2016-06-08	0.923145	0.946152	1.01599	0.890274	0.912532	0.916456
2016-06-08 01:00:00	0.960348	0.985068	0.948412	0.935142	0.949273	0.953796
2016-06-08 02:00:00	0.967388	0.991928	1.06149	0.964492	0.956434	0.959934
2016-06-08 03:00:00	0.854374	0.868633	0.963048	0.838446	0.843771	0.846061
2016-06-08 04:00:00	0.443299	0.455499	0.611445	0.430136	0.43736	0.436202
2016-06-08 05:00:00	0.457765	0.473422	0.619949	0.44547	0.45122	0.450827
2016-06-08 06:00:00	0.461289	0.475219	0.622581	0.447429	0.45421	0.454056
2016-06-08 07:00:00	0.334479	0.343345	0.562967	0.337586	0.329132	0.327163
2016-06-08 08:00:00	0.510055	0.529193	0.649519	0.498017	0.501564	0.503054
2016-06-08 09:00:00	0.341368	0.349199	0.566192	0.344612	0.334997	0.333992
2016-06-08 10:00:00	0.421438	0.443075	0.605098	0.419234	0.413932	0.414392
2016-06-08 11:00:00	0.702949	0.748593	0.821302	0.705412	0.691937	0.695615
2016-06-08 12:00:00	0.625103	0.658234	0.765126	0.619833	0.615526	0.617163
2016-06-08 13:00:00	0.535018	0.547272	0.638543	0.513793	0.525844	0.527323
2016-06-08 14:00:00	0.690767	0.692638	0.821359	0.653261	0.678808	0.683107
2016-06-08 15:00:00	1.10372	1.09609	1.18599	1.06469	1.08724	1.09639
2016-06-08 16:00:00	0.486934	0.49062	0.648565	0.438644	0.47878	0.479812
2016-06-08 17:00:00	0.779013	0.814948	0.90119	0.807787	0.770525	0.770076
2016-06-08 18:00:00	0.633997	0.663058	0.816414	0.664025	0.625979	0.625231
2016-06-08 19:00:00	0.296293	0.309476	0.508385	0.315477	0.28991	0.289272
2016-06-08 20:00:00	0.259798	0.273228	0.492507	0.278296	0.254322	0.252524
2016-06-08 21:00:00	0.729104	0.72982	0.850445	0.70942	0.715831	0.721253
2016-06-08 22:00:00	0.85789	0.869055	0.955578	0.847307	0.843754	0.850456
2016-06-08 23:00:00	0.690467	0.708806	0.790383	0.683082	0.677692	0.682638
2016-06-09	0.921367	0.934589	0.991591	0.894023	0.910506	0.914628
2016-06-09 01:00:00	1.3352	1.37601	1.35611	1.33271	1.32355	1.32883
2016-06-09 02:00:00	0.706907	0.737169	0.882123	0.696165	0.697683	0.69853
2016-06-09 03:00:00	0.633625	0.657864	0.732375	0.604428	0.62478	0.626278
2016-06-09 04:00:00	0.504501	0.530654	0.641579	0.483685	0.496917	0.497492
2016-06-09 05:00:00	0.384082	0.406751	0.58495	0.375736	0.378012	0.376975
2016-06-09 06:00:00	0.460936	0.482058	0.621061	0.444175	0.453048	0.453749
2016-06-09 07:00:00	0.353664	0.374676	0.572801	0.352486	0.347045	0.346388
2016-06-09 08:00:00	0.41848	0.443793	0.60053	0.408641	0.410487	0.411247
2016-06-09 09:00:00	0.398883	0.428393	0.592394	0.392659	0.391022	0.391687
2016-06-09 10:00:00	0.332526	0.357724	0.559529	0.334738	0.325347	0.325122
2016-06-09 11:00:00	0.699691	0.752616	0.839787	0.698818	0.688537	0.692353
2016-06-09 12:00:00	0.704598	0.745723	0.85254	0.705611	0.69293	0.697621
2016-06-09 13:00:00	0.358652	0.402709	0.539072	0.357111	0.353174	0.351338
2016-06-09 14:00:00	0.0831903	0.126371	0.367772	0.0990797	0.0841335	0.0764289
2016-06-09 15:00:00	0.0934178	0.125939	0.357696	0.107058	0.0931998	0.0860786
2016-06-09 16:00:00	0.293799	0.34142	0.533611	0.306223	0.290194	0.286397
2016-06-09 17:00:00	0.529708	0.553889	0.713118	0.518272	0.523124	0.521936
2016-06-09 18:00:00	0.643979	0.684365	0.798062	0.656929	0.635783	0.634915
2016-06-09 19:00:00	1.05258	1.07421	1.12652	1.03754	1.04215	1.04554
2016-06-09 20:00:00	0.501022	0.505406	0.61525	0.485043	0.490622	0.493263
2016-06-09 21:00:00	0.595376	0.600836	0.688241	0.583907	0.583936	0.587516
2016-06-09 22:00:00	0.652043	0.680498	0.764107	0.667414	0.640333	0.644564
2016-06-09 23:00:00	0.475345	0.495367	0.653487	0.489249	0.46479	0.467293
2016-06-10	0.725673	0.779725	0.890163	0.733889	0.718926	0.717481
2016-06-10 01:00:00	0.713387	0.753443	0.889907	0.721475	0.704724	0.705696
2016-06-10 02:00:00	0.647193	0.711081	0.827771	0.63909	0.639568	0.639297
2016-06-10 03:00:00	0.542338	0.580984	0.659186	0.520402	0.533775	0.534433
2016-06-10 04:00:00	0.466876	0.51062	0.627729	0.453738	0.460111	0.459957
2016-06-10 05:00:00	0.470191	0.527997	0.636349	0.461897	0.463166	0.463486
2016-06-10 06:00:00	0.728763	0.799755	0.864123	0.725786	0.717307	0.721181
2016-06-10 07:00:00	0.350478	0.396757	0.572266	0.353356	0.343948	0.343469
2016-06-10 08:00:00	0.307285	0.352118	0.549865	0.317515	0.300984	0.300089
2016-06-10 09:00:00	0.392442	0.446722	0.589972	0.391376	0.384811	0.38549
2016-06-10 10:00:00	0.684284	0.735585	0.798985	0.684764	0.672364	0.67669
2016-06-10 11:00:00	1.02978	1.0785	1.11169	1.03888	1.01488	1.02279
2016-06-10 12:00:00	0.77188	0.798005	0.84876	0.751657	0.759132	0.763885
2016-06-10 13:00:00	0.183369	0.228843	0.459797	0.195371	0.181186	0.176507
2016-06-10 14:00:00	0.1685	0.222521	0.434701	0.182701	0.167496	0.162107
2016-06-10 15:00:00	0.58357	0.60262	0.726092	0.605113	0.574201	0.57581
2016-06-10 16:00:00	0.235208	0.276442	0.480335	0.262182	0.232107	0.228634
2016-06-10 17:00:00	0.0772219	0.113375	0.358728	0.110477	0.0770638	0.0708059
2016-06-10 18:00:00	0.0928686	0.105462	0.369779	0.110686	0.0908639	0.086234
2016-06-10 19:00:00	1.22571	1.2178	1.44443	1.31674	1.21699	1.2185
2016-06-10 20:00:00	0.630288	0.667196	0.80232	0.640288	0.622469	0.621647
2016-06-10 21:00:00	0.275595	0.29199	0.510018	0.29902	0.269277	0.268299
2016-06-10 22:00:00	0.423626	0.460194	0.578827	0.453895	0.414579	0.416588
2016-06-10 23:00:00	0.352658	0.374834	0.571018	0.390233	0.343665	0.344981
2016-06-11	0.439571	0.493984	0.612543	0.438033	0.43604	0.433315
2016-06-11 01:00:00	0.386932	0.446703	0.590176	0.394305	0.383252	0.380809
2016-06-11 02:00:00	0.404334	0.471303	0.594393	0.40415	0.400086	0.397891
2016-06-11 03:00:00	0.454762	0.531559	0.625837	0.453912	0.448963	0.448543
2016-06-11 04:00:00	0.355825	0.426545	0.573401	0.362705	0.351101	0.349212
2016-06-11 05:00:00	0.436611	0.513984	0.611265	0.436827	0.43012	0.429867
2016-06-11 06:00:00	0.324009	0.385976	0.565251	0.335036	0.3182	0.316989
2016-06-11 07:00:00	0.43008	0.500445	0.610165	0.431177	0.422743	0.423255
2016-06-11 08:00:00	0.348529	0.409451	0.570111	0.356645	0.341919	0.341626
2016-06-11 09:00:00	0.388944	0.445645	0.588265	0.393002	0.381615	0.381984
2016-06-11 10:00:00	0.435849	0.490009	0.610551	0.443139	0.428143	0.429129
2016-06-11 11:00:00	0.344837	0.390627	0.525808	0.357383	0.338754	0.338142
2016-06-11 12:00:00	0.311982	0.349367	0.523602	0.32258	0.306437	0.30497
2016-06-11 13:00:00	0.175709	0.200474	0.451055	0.196229	0.172321	0.168755
2016-06-11 14:00:00	0.27625	0.305531	0.49868	0.291834	0.27066	0.26914
2016-06-11 15:00:00	0.319013	0.348253	0.522474	0.343839	0.312253	0.311846
2016-06-11 16:00:00	0.326648	0.349363	0.557185	0.35839	0.31888	0.319316
2016-06-11 17:00:00	0.466332	0.504221	0.619595	0.487196	0.456947	0.459495
2016-06-11 18:00:00	0.265211	0.290543	0.499002	0.295927	0.258912	0.258116
2016-06-11 19:00:00	0.185659	0.21182	0.455765	0.221421	0.181276	0.178719
2016-06-11 20:00:00	0.304658	0.331823	0.520561	0.332823	0.297627	0.297428
2016-06-11 21:00:00	0.286196	0.309925	0.528691	0.32108	0.278527	0.278694
2016-06-11 22:00:00	0.329299	0.360718	0.552662	0.358706	0.32096	0.321856
2016-06-11 23:00:00	0.490972	0.544166	0.643453	0.517608	0.480535	0.483903
2016-06-12	0.324575	0.383238	0.556807	0.335443	0.322755	0.318327
2016-06-12 01:00:00	0.371386	0.439609	0.580544	0.370717	0.368336	0.365176
2016-06-12 02:00:00	0.35421	0.418831	0.572433	0.356945	0.350468	0.347885
2016-06-12 03:00:00	0.335697	0.402768	0.565174	0.347032	0.331712	0.329225
2016-06-12 04:00:00	0.404813	0.474408	0.599596	0.399307	0.398844	0.398062
2016-06-12 05:00:00	0.315672	0.382984	0.557805	0.321891	0.310435	0.308777
2016-06-12 06:00:00	0.479037	0.565872	0.637609	0.478939	0.471312	0.472803
2016-06-12 07:00:00	0.401243	0.475601	0.598582	0.401428	0.394328	0.39473
2016-06-12 08:00:00	0.318302	0.378107	0.558431	0.326565	0.312297	0.311303
2016-06-12 09:00:00	0.377654	0.424123	0.581953	0.379085	0.371093	0.370576
2016-06-12 10:00:00	0.305977	0.341561	0.544525	0.315557	0.300497	0.29883
2016-06-12 11:00:00	0.284466	0.31773	0.505827	0.291763	0.279372	0.277445
2016-06-12 12:00:00	0.330668	0.363973	0.536161	0.334396	0.324363	0.323575
2016-06-12 13:00:00	0.120076	0.163184	0.403943	0.141512	0.119148	0.113939
2016-06-12 14:00:00	0.164983	0.215582	0.413644	0.173484	0.163459	0.158937
2016-06-12 15:00:00	0.135056	0.163409	0.396563	0.141699	0.13285	0.128299
2016-06-12 16:00:00	0.0813678	0.116728	0.364451	0.100941	0.0810368	0.0751086
2016-06-12 17:00:00	0.139087	0.154499	0.427458	0.156674	0.135588	0.132131
2016-06-12 18:00:00	0.357321	0.379812	0.547869	0.365499	0.348399	0.34993
2016-06-12 19:00:00	0.392019	0.414056	0.566373	0.40077	0.382503	0.384738
2016-06-12 20:00:00	0.246102	0.264597	0.48596	0.269432	0.239458	0.238597
2016-06-12 21:00:00	0.293217	0.320534	0.513431	0.316971	0.285866	0.285909
2016-06-12 22:00:00	0.265913	0.295965	0.499491	0.295658	0.258267	0.258458
2016-06-12 23:00:00	0.328386	0.371954	0.559958	0.355516	0.319291	0.3209
2016-06-13	0.407547	0.473679	0.596906	0.397894	0.403787	0.401205
2016-06-13 01:00:00	0.427951	0.498214	0.603992	0.430596	0.422697	0.421762
2016-06-13 02:00:00	0.67816	0.7555	0.80924	0.652527	0.668622	0.671665
2016-06-13 03:00:00	0.491029	0.558982	0.67126	0.473964	0.483025	0.484171
2016-06-13 04:00:00	0.339943	0.413867	0.565984	0.342135	0.334683	0.333312
2016-06-13 05:00:00	0.395618	0.473074	0.592011	0.390344	0.389195	0.389017
2016-06-13 06:00:00	0.322053	0.388936	0.558909	0.326834	0.316338	0.315218
2016-06-13 07:00:00	0.350341	0.4138	0.570814	0.34914	0.344057	0.343509
2016-06-13 08:00:00	0.385606	0.435633	0.585757	0.38002	0.37868	0.378595
2016-06-13 09:00:00	0.297016	0.335686	0.546493	0.304077	0.291133	0.289804
2016-06-13 10:00:00	0.349559	0.391863	0.566779	0.346515	0.342934	0.342534
2016-06-13 11:00:00	0.741988	0.81008	0.876544	0.741798	0.731047	0.735396
2016-06-13 12:00:00	0.523993	0.574807	0.695105	0.524092	0.514772	0.516868
2016-06-13 13:00:00	0.233748	0.280701	0.497702	0.23968	0.230529	0.226768
2016-06-13 14:00:00	0.098485	0.149902	0.371316	0.113223	0.0980806	0.0913434
2016-06-13 15:00:00	0.250938	0.303585	0.497782	0.258898	0.247907	0.243577
2016-06-13 16:00:00	0.186285	0.246523	0.475223	0.21088	0.184438	0.178928
2016-06-13 17:00:00	0.259585	0.312884	0.496579	0.269369	0.25583	0.252514
2016-06-13 18:00:00	0.591874	0.65364	0.743204	0.624395	0.582658	0.582806
2016-06-13 19:00:00	0.279192	0.318642	0.519559	0.300631	0.274014	0.271271
2016-06-13 20:00:00	0.246637	0.285408	0.483252	0.267413	0.240682	0.23854
2016-06-13 21:00:00	0.47332	0.527873	0.658372	0.489267	0.463995	0.465081
2016-06-13 22:00:00	0.87784	0.932564	0.992447	0.888056	0.863092	0.870615
2016-06-13 23:00:00	2.81774	2.82662	2.78443	2.87185	2.81772	2.81791
2016-06-14	1.16253	1.19313	1.17711	1.1269	1.14922	1.1558
2016-06-14 01:00:00	1.47237	1.5306	1.51872	1.51731	1.46371	1.46708
2016-06-14 02:00:00	1.30335	1.37178	1.35602	1.31857	1.29305	1.29603
2016-06-14 03:00:00	0.759232	0.801583	0.851606	0.730411	0.747908	0.751382
2016-06-14 04:00:00	0.481419	0.539443	0.645451	0.475803	0.474222	0.473607
2016-06-14 05:00:00	0.509473	0.567357	0.673883	0.503373	0.501803	0.501699
2016-06-14 06:00:00	0.338155	0.381133	0.564567	0.338635	0.332392	0.331048
2016-06-14 07:00:00	0.418938	0.462142	0.59979	0.411363	0.411941	0.411832
2016-06-14 08:00:00	0.318827	0.353496	0.555976	0.324172	0.313079	0.311622
2016-06-14 09:00:00	0.358908	0.391432	0.572205	0.358954	0.352141	0.351677
2016-06-14 10:00:00	1.02856	1.0801	1.07839	1.02169	1.01491	1.0217
2016-06-14 11:00:00	0.875314	0.912163	0.958326	0.880848	0.860907	0.868321
2016-06-14 12:00:00	0.796721	0.835248	0.893164	0.78407	0.783915	0.788823
2016-06-14 13:00:00	0.240139	0.280195	0.506052	0.244322	0.236549	0.233448
2016-06-14 14:00:00	0.0939908	0.126614	0.365457	0.111877	0.0934642	0.0869895
2016-06-14 15:00:00	0.320763	0.341662	0.498936	0.308714	0.314731	0.31371
2016-06-14 16:00:00	0.0730872	0.0867166	0.361192	0.0880816	0.0720982	0.066313
2016-06-14 17:00:00	0.0648814	0.0861336	0.360577	0.0965844	0.064706	0.0585945
2016-06-14 18:00:00	0.0904003	0.131401	0.383584	0.125914	0.0896727	0.0845794
2016-06-14 19:00:00	0.0555339	0.0815276	0.347494	0.0870133	0.0545352	0.0487143
2016-06-14 20:00:00	0.181432	0.217792	0.440085	0.210435	0.177519	0.17486
2016-06-14 21:00:00	0.262619	0.295778	0.501824	0.286712	0.256147	0.255435
2016-06-14 22:00:00	0.319012	0.35061	0.518537	0.349733	0.310114	0.311629
2016-06-14 23:00:00	0.42909	0.470169	0.636051	0.45025	0.418186	0.421295
2016-06-15	0.702188	0.748846	0.784757	0.67807	0.693098	0.695418
2016-06-15 01:00:00	1.37924	1.40616	1.41122	1.37501	1.36355	1.3731
2016-06-15 02:00:00	1.57586	1.56244	1.54323	1.5881	1.56083	1.57014
2016-06-15 03:00:00	0.868409	0.905839	0.969777	0.868443	0.856307	0.859878
2016-06-15 04:00:00	0.463504	0.50706	0.635455	0.458905	0.456343	0.456022
2016-06-15 05:00:00	0.422932	0.466212	0.602448	0.422022	0.416569	0.415797
2016-06-15 06:00:00	0.346224	0.382068	0.566044	0.354174	0.340654	0.339021
2016-06-15 07:00:00	0.373061	0.404974	0.576752	0.378971	0.366768	0.365792
2016-06-15 08:00:00	0.479973	0.520025	0.635781	0.482638	0.471773	0.473014
2016-06-15 09:00:00	0.60289	0.639538	0.721693	0.606655	0.592663	0.595738
2016-06-15 10:00:00	0.387351	0.421489	0.587497	0.399808	0.379928	0.380208
2016-06-15 11:00:00	0.370531	0.402047	0.557042	0.382791	0.363512	0.363323
2016-06-15 12:00:00	0.334249	0.360646	0.533105	0.350498	0.326902	0.326492
2016-06-15 13:00:00	0.256228	0.305603	0.479802	0.263433	0.251693	0.248582
2016-06-15 14:00:00	0.115489	0.17063	0.390583	0.122329	0.114442	0.108105
2016-06-15 15:00:00	0.0650747	0.113505	0.353002	0.0746332	0.0645236	0.0575786
2016-06-15 16:00:00	0.370738	0.434813	0.570866	0.386096	0.364677	0.363494
2016-06-15 17:00:00	0.473051	0.521309	0.750397	0.482969	0.465529	0.466107
2016-06-15 18:00:00	0.102526	0.135104	0.374461	0.134828	0.100932	0.095408
2016-06-15 19:00:00	0.194417	0.232797	0.438592	0.226187	0.190711	0.187203
2016-06-15 20:00:00	0.284473	0.325675	0.511824	0.312856	0.278446	0.276768
2016-06-15 21:00:00	0.307417	0.347263	0.508824	0.340044	0.299521	0.299572
2016-06-15 22:00:00	0.595471	0.649642	0.741771	0.625428	0.583748	0.588183
2016-06-15 23:00:00	0.648227	0.701009	0.788089	0.686875	0.635507	0.639332
2016-06-16	0.755355	0.786441	0.924254	0.784093	0.746317	0.748047
2016-06-16 01:00:00	0.883575	0.899402	0.997918	0.916308	0.872874	0.876572
2016-06-16 02:00:00	0.544152	0.606385	0.706781	0.554016	0.537148	0.536658
2016-06-16 03:00:00	0.392786	0.438735	0.593266	0.397899	0.387215	0.385999
2016-06-16 04:00:00	0.402485	0.446801	0.594134	0.402929	0.396431	0.395853
2016-06-16 05:00:00	0.355045	0.398477	0.572806	0.360268	0.349314	0.348306
2016-06-16 06:00:00	0.441681	0.494202	0.614299	0.445367	0.434323	0.435236
2016-06-16 07:00:00	0.424968	0.471111	0.609011	0.424264	0.4178	0.41816
2016-06-16 08:00:00	0.417338	0.456049	0.601219	0.419202	0.409638	0.410533
2016-06-16 09:00:00	0.503566	0.544456	0.65147	0.501698	0.494347	0.496626
2016-06-16 10:00:00	0.643047	0.679425	0.783871	0.675033	0.632028	0.634793
2016-06-16 11:00:00	0.666104	0.7054	0.812856	0.68423	0.654558	0.658942
2016-06-16 12:00:00	0.26808	0.304638	0.493576	0.286013	0.262685	0.26051
2016-06-16 13:00:00	0.387211	0.431299	0.601636	0.388232	0.380792	0.380468
2016-06-16 14:00:00	0.13254	0.159683	0.400821	0.159126	0.13022	0.126361
2016-06-16 15:00:00	0.205866	0.242518	0.450865	0.226388	0.202607	0.199434
2016-06-16 16:00:00	0.68803	0.702599	0.801872	0.739907	0.680009	0.678098
2016-06-16 17:00:00	0.480962	0.541923	0.690444	0.534494	0.475257	0.472301
2016-06-16 18:00:00	0.215549	0.276806	0.475092	0.241721	0.211927	0.209125
2016-06-16 19:00:00	0.735904	0.793854	1.53188	0.755508	0.723553	0.729166
2016-06-16 20:00:00	0.199412	0.254111	0.441212	0.231856	0.195136	0.192529
2016-06-16 21:00:00	0.475958	0.511993	0.613642	0.49244	0.465308	0.467605
2016-06-16 22:00:00	0.648529	0.680535	0.776037	0.673542	0.635213	0.640999
2016-06-16 23:00:00	0.727734	0.772152	0.893339	0.761009	0.714248	0.718863
2016-06-17	0.973733	0.97695	1.03146	0.982966	0.962684	0.967679
2016-06-17 01:00:00	0.852688	0.854849	0.981874	0.885836	0.842199	0.845482
2016-06-17 02:00:00	0.815609	0.823851	0.956612	0.84657	0.805044	0.808238
2016-06-17 03:00:00	0.558372	0.607415	0.71261	0.560755	0.551039	0.550563
2016-06-17 04:00:00	0.611702	0.658411	0.740228	0.617135	0.602725	0.604085
2016-06-17 05:00:00	0.544275	0.604343	0.679392	0.539748	0.536123	0.537801
2016-06-17 06:00:00	0.388167	0.428692	0.582232	0.393721	0.381712	0.381262
2016-06-17 07:00:00	0.530719	0.580174	0.667853	0.525718	0.522276	0.523891
2016-06-17 08:00:00	0.352545	0.388569	0.568697	0.358434	0.346127	0.345326
2016-06-17 09:00:00	0.380568	0.416799	0.580258	0.386286	0.373556	0.373349
2016-06-17 10:00:00	0.408232	0.441065	0.596011	0.413765	0.400408	0.40108
2016-06-17 11:00:00	0.693203	0.763732	0.849984	0.702223	0.682961	0.686758
2016-06-17 12:00:00	0.494576	0.546866	0.654948	0.503721	0.485561	0.487151
2016-06-17 13:00:00	0.26448	0.30857	0.517338	0.283218	0.2602	0.257157
2016-06-17 14:00:00	0.216213	0.257286	0.456213	0.229037	0.212956	0.209152
2016-06-17 15:00:00	0.0995922	0.138189	0.381354	0.12519	0.0985352	0.0928292
2016-06-17 16:00:00	0.392579	0.477924	0.609501	0.426027	0.387119	0.385991
2016-06-17 17:00:00	0.655173	0.672808	0.76956	0.641274	0.643109	0.64788
2016-06-17 18:00:00	0.535998	0.575208	0.631983	0.52677	0.525544	0.529209
2016-06-17 19:00:00	1.05195	1.08015	1.12929	1.04299	1.03674	1.04518
2016-06-17 20:00:00	0.763166	0.813368	0.875382	0.758667	0.749613	0.756291
2016-06-17 21:00:00	0.920268	0.956016	1.02445	0.919859	0.90439	0.913007
2016-06-17 22:00:00	0.772549	0.845734	0.865515	0.790818	0.758624	0.765459
2016-06-17 23:00:00	0.39836	0.455537	0.603154	0.429401	0.387575	0.390886
2016-06-18	0.685921	0.767134	0.831685	0.699043	0.678678	0.678696
2016-06-18 01:00:00	0.847921	0.881395	0.991438	0.891961	0.838032	0.840399
2016-06-18 02:00:00	0.461017	0.530273	0.634384	0.465967	0.455479	0.453776
2016-06-18 03:00:00	0.399516	0.456068	0.590999	0.402018	0.393874	0.392498
2016-06-18 04:00:00	0.418043	0.468269	0.599995	0.417737	0.41207	0.411286
2016-06-18 05:00:00	0.396154	0.440933	0.588841	0.403095	0.390361	0.389429
2016-06-18 06:00:00	0.354682	0.375344	0.576085	0.358815	0.348372	0.347489
2016-06-18 07:00:00	0.397052	0.434646	0.588196	0.407933	0.390384	0.389943
2016-06-18 08:00:00	0.40875	0.443407	0.596153	0.422452	0.401356	0.401609
2016-06-18 09:00:00	0.372017	0.403	0.575122	0.390227	0.364639	0.364737
2016-06-18 10:00:00	0.348099	0.379515	0.565044	0.369684	0.340984	0.340845
2016-06-18 11:00:00	0.430599	0.47236	0.582008	0.447871	0.422578	0.423842
2016-06-18 12:00:00	0.627987	0.694044	0.771202	0.64631	0.618074	0.621355
2016-06-18 13:00:00	0.296819	0.339754	0.54352	0.316008	0.292108	0.290128
2016-06-18 14:00:00	0.516599	0.53631	0.634753	0.499674	0.506752	0.509198
2016-06-18 15:00:00	0.989994	1.01045	1.09566	0.977254	0.979669	0.983485
2016-06-18 16:00:00	0.8514	0.890333	0.960083	0.851026	0.841815	0.844016
2016-06-18 17:00:00	0.574713	0.627382	0.752115	0.550079	0.566847	0.567071
2016-06-18 18:00:00	0.320843	0.409474	0.52828	0.329864	0.314883	0.314557
2016-06-18 19:00:00	0.724204	0.784672	0.8483	0.711963	0.711222	0.717099
2016-06-18 20:00:00	0.644106	0.705151	0.751855	0.636553	0.631231	0.636828
2016-06-18 21:00:00	0.966906	1.03494	1.09058	0.976494	0.952511	0.960424
2016-06-18 22:00:00	1.13556	1.21336	1.29134	1.19052	1.1205	1.12953
2016-06-18 23:00:00	0.801736	0.864653	0.916883	0.831796	0.786552	0.793877
2016-06-19	0.801269	0.8702	0.937537	0.805048	0.791906	0.794865
2016-06-19 01:00:00	1.06915	1.13383	1.11176	1.06853	1.05666	1.06335
2016-06-19 02:00:00	0.851897	0.921924	0.946847	0.851916	0.840795	0.845464
2016-06-19 03:00:00	0.781632	0.853875	0.938583	0.783815	0.771776	0.773708
2016-06-19 04:00:00	1.15728	1.14429	1.15967	1.19471	1.144	1.15025
2016-06-19 05:00:00	0.518948	0.561255	0.652731	0.511526	0.511379	0.511727
2016-06-19 06:00:00	0.56328	0.603191	0.68915	0.563282	0.554794	0.555763
2016-06-19 07:00:00	0.599282	0.63306	0.72349	0.606291	0.589694	0.591403
2016-06-19 08:00:00	0.36092	0.384749	0.571247	0.36472	0.353777	0.353462
2016-06-19 09:00:00	0.337854	0.359467	0.557625	0.344672	0.330586	0.330258
2016-06-19 10:00:00	0.428336	0.444586	0.601509	0.427471	0.41928	0.420855
2016-06-19 11:00:00	0.369165	0.38826	0.571057	0.370246	0.361093	0.361729
2016-06-19 12:00:00	0.406859	0.431044	0.574668	0.415695	0.398107	0.399747
2016-06-19 13:00:00	0.321481	0.355058	0.536543	0.328691	0.315063	0.314861
2016-06-19 14:00:00	0.471314	0.519017	0.657153	0.485483	0.463447	0.463612
2016-06-19 15:00:00	0.154657	0.195735	0.417702	0.164932	0.152202	0.148227
2016-06-19 16:00:00	0.141675	0.204361	0.411726	0.159853	0.139674	0.13556
2016-06-19 17:00:00	0.253958	0.325327	0.514714	0.271648	0.249541	0.246822
2016-06-19 18:00:00	0.169733	0.251081	0.424896	0.188425	0.166333	0.163304
2016-06-19 19:00:00	0.721956	0.773026	0.84612	0.701412	0.707789	0.714649
2016-06-19 20:00:00	0.569842	0.639282	0.659801	0.566586	0.557812	0.562909
2016-06-19 21:00:00	0.822329	0.881102	0.916106	0.820554	0.807271	0.814692
2016-06-19 22:00:00	0.849402	0.902187	0.9257	0.855795	0.833017	0.842093
2016-06-19 23:00:00	0.752291	0.815512	1.00438	0.76327	0.737527	0.745122
2016-06-20	0.602697	0.688603	0.753375	0.612816	0.596125	0.59521
2016-06-20 01:00:00	0.987946	1.03405	1.0512	1.01406	0.97694	0.981103
2016-06-20 02:00:00	0.833999	0.871957	0.978355	0.871974	0.823895	0.826216
2016-06-20 03:00:00	0.762223	0.810821	0.919497	0.792104	0.753011	0.75376
2016-06-20 04:00:00	0.730192	0.770082	0.837061	0.734348	0.720117	0.722322
2016-06-20 05:00:00	0.412147	0.451311	0.594964	0.408269	0.4061	0.405187
2016-06-20 06:00:00	0.444684	0.478269	0.613274	0.438267	0.437186	0.437424
2016-06-20 07:00:00	0.399716	0.4349	0.588374	0.397943	0.392872	0.392631
2016-06-20 08:00:00	0.40361	0.436769	0.59014	0.403445	0.396297	0.396486
2016-06-20 09:00:00	0.402818	0.426651	0.591595	0.403585	0.394413	0.395274
2016-06-20 10:00:00	0.383779	0.409223	0.578521	0.387165	0.375887	0.376499
2016-06-20 11:00:00	0.458328	0.479658	0.604042	0.455309	0.448977	0.451013
2016-06-20 12:00:00	0.468492	0.50663	0.644131	0.482881	0.459225	0.461451
2016-06-20 13:00:00	0.34188	0.378618	0.540612	0.348064	0.335638	0.334835
2016-06-20 14:00:00	0.280812	0.326407	0.489443	0.278101	0.276078	0.273957
2016-06-20 15:00:00	0.565533	0.599563	0.745714	0.616669	0.558142	0.554942
2016-06-20 16:00:00	0.767382	0.823679	0.89393	0.794102	0.758373	0.758915
2016-06-20 17:00:00	0.0675375	0.127148	0.363629	0.0918433	0.0662522	0.0612567
2016-06-20 18:00:00	0.0877367	0.148341	0.371769	0.115552	0.0852859	0.0814886
2016-06-20 19:00:00	0.286543	0.355502	0.493345	0.298421	0.279418	0.279705
2016-06-20 20:00:00	0.320846	0.387816	0.517206	0.346269	0.312563	0.314038
2016-06-20 21:00:00	0.272026	0.319705	0.494794	0.30351	0.263412	0.264629
2016-06-20 22:00:00	0.526168	0.581232	0.623067	0.545421	0.513593	0.51882
2016-06-20 23:00:00	0.379656	0.42658	0.580948	0.407983	0.368418	0.371859
2016-06-21	1.05888	1.12011	1.16028	1.05987	1.0479	1.05272
2016-06-21 01:00:00	0.818589	0.839936	0.959283	0.856533	0.808989	0.810733
2016-06-21 02:00:00	0.799653	0.819931	0.946698	0.832122	0.789782	0.791796
2016-06-21 03:00:00	0.56886	0.617101	0.712147	0.569859	0.56122	0.560838
2016-06-21 04:00:00	0.551053	0.602237	0.680251	0.549492	0.543542	0.544243
2016-06-21 05:00:00	0.54265	0.580197	0.659726	0.536607	0.534183	0.535821
2016-06-21 06:00:00	0.460427	0.493138	0.62116	0.457908	0.452744	0.453154
2016-06-21 07:00:00	0.529161	0.572092	0.660691	0.529254	0.520554	0.522178
2016-06-21 08:00:00	0.470865	0.497515	0.62331	0.46876	0.462019	0.463303
2016-06-21 09:00:00	0.401294	0.428625	0.587181	0.406823	0.393486	0.393872
2016-06-21 10:00:00	0.478551	0.516039	0.617912	0.483521	0.469723	0.471555
2016-06-21 11:00:00	0.470896	0.49984	0.623416	0.472076	0.461851	0.46373
2016-06-21 12:00:00	0.266057	0.292473	0.497163	0.281087	0.260927	0.258969
2016-06-21 13:00:00	0.45672	0.50998	0.642765	0.467341	0.449251	0.449618
2016-06-21 14:00:00	0.338915	0.399648	0.569112	0.340331	0.333702	0.3318
2016-06-21 15:00:00	0.327782	0.390913	0.530888	0.3297	0.322254	0.320308
2016-06-21 16:00:00	0.735245	0.800699	0.863505	0.718982	0.723058	0.727652
2016-06-21 17:00:00	0.336759	0.419176	0.527228	0.345857	0.330774	0.330225
2016-06-21 18:00:00	0.110685	0.181533	0.389458	0.1486	0.108512	0.103813
2016-06-21 19:00:00	0.22307	0.293373	0.458663	0.255716	0.218224	0.216454
2016-06-21 20:00:00	0.515252	0.562298	0.647711	0.529491	0.504748	0.507493
2016-06-21 21:00:00	1.11852	1.13868	1.1314	1.14941	1.10245	1.11107
2016-06-21 22:00:00	1.15605	1.19152	1.18224	1.20236	1.14032	1.14919
2016-06-21 23:00:00	0.454216	0.472112	0.631001	0.482072	0.442262	0.446123
2016-06-22	0.946171	0.974719	1.02535	0.955213	0.936184	0.937943
2016-06-22 01:00:00	0.911798	0.927911	1.00462	0.927542	0.900904	0.903438
2016-06-22 02:00:00	0.567235	0.584537	0.666684	0.557678	0.559647	0.559837
2016-06-22 03:00:00	0.346993	0.372714	0.564972	0.361202	0.34277	0.339728
2016-06-22 04:00:00	0.442426	0.475784	0.613187	0.449383	0.43637	0.435246
2016-06-22 05:00:00	0.388463	0.421246	0.582521	0.399278	0.382776	0.381275
2016-06-22 06:00:00	0.41622	0.444962	0.595841	0.429354	0.409015	0.408951
2016-06-22 07:00:00	0.504959	0.549648	0.64382	0.511747	0.495178	0.4975
2016-06-22 08:00:00	0.384326	0.421004	0.582125	0.389177	0.37605	0.376436
2016-06-22 09:00:00	0.356174	0.386395	0.569049	0.366788	0.34791	0.348329
2016-06-22 10:00:00	0.375604	0.393615	0.575962	0.393888	0.367545	0.368188
2016-06-22 11:00:00	0.826981	0.880206	0.933453	0.858302	0.814003	0.819371
2016-06-22 12:00:00	0.547182	0.569222	0.698697	0.57914	0.537002	0.53939
2016-06-22 13:00:00	0.291759	0.314147	0.505134	0.329679	0.285511	0.283889
2016-06-22 14:00:00	0.2546	0.274612	0.509827	0.291335	0.249285	0.247279
2016-06-22 15:00:00	0.3574	0.371502	0.533659	0.394294	0.348708	0.350184
2016-06-22 16:00:00	0.120838	0.14636	0.380137	0.164996	0.118697	0.114121
2016-06-22 17:00:00	0.125526	0.130295	0.368478	0.147503	0.122464	0.118247
2016-06-22 18:00:00	0.0405908	0.0766861	0.338625	0.0875834	0.0405413	0.0344251
2016-06-22 19:00:00	0.0963453	0.136896	0.371411	0.142169	0.0947756	0.0899804
2016-06-22 20:00:00	0.149192	0.174582	0.41407	0.195824	0.145287	0.142385
2016-06-22 21:00:00	0.291302	0.314179	0.497565	0.329437	0.283761	0.284022
2016-06-22 22:00:00	0.483639	0.512469	0.610714	0.518106	0.472666	0.476362
2016-06-22 23:00:00	0.488383	0.508948	0.633343	0.524186	0.476246	0.480313
2016-06-23	0.85316	0.879382	0.959708	0.871079	0.843784	0.846229
2016-06-23 01:00:00	0.917711	0.944122	1.01972	0.955548	0.906042	0.908872
2016-06-23 02:00:00	0.913582	0.923909	1.02109	0.968438	0.901758	0.905253
2016-06-23 03:00:00	1.1077	1.18476	1.193	1.14086	1.09733	1.10004
2016-06-23 04:00:00	0.913595	0.971926	1.04783	0.912441	0.903268	0.905639
2016-06-23 05:00:00	1.07598	1.13417	1.1669	1.11172	1.06396	1.06899
2016-06-23 06:00:00	0.484498	0.523838	0.634546	0.516547	0.475821	0.477561
2016-06-23 07:00:00	0.43968	0.469941	0.609035	0.465009	0.431054	0.432119
2016-06-23 08:00:00	0.332302	0.358499	0.557436	0.357113	0.324069	0.324314
2016-06-23 09:00:00	0.444239	0.486482	0.61003	0.46149	0.435097	0.436716
2016-06-23 10:00:00	0.300139	0.324482	0.534805	0.32419	0.292943	0.292471
2016-06-23 11:00:00	0.905386	0.968892	1.08204	0.938784	0.892208	0.898289
2016-06-23 12:00:00	0.546204	0.597004	0.68035	0.56131	0.536222	0.538235
2016-06-23 13:00:00	0.314146	0.350954	0.511663	0.333505	0.3083	0.306498
2016-06-23 14:00:00	0.242772	0.29691	0.457728	0.268264	0.238843	0.235808
2016-06-23 15:00:00	0.158754	0.214383	0.408243	0.183794	0.156491	0.151679
2016-06-23 16:00:00	0.2234	0.285146	0.483617	0.252537	0.219614	0.216286
2016-06-23 17:00:00	0.204311	0.260849	0.433137	0.237138	0.199754	0.197339
2016-06-23 18:00:00	0.287669	0.340658	0.506587	0.31848	0.28104	0.279746
2016-06-23 19:00:00	0.188006	0.261844	0.43553	0.229833	0.183325	0.180453
2016-06-23 20:00:00	0.608863	0.637429	0.768401	0.662888	0.597358	0.599988
2016-06-23 21:00:00	0.642865	0.67775	0.770883	0.685834	0.629916	0.634556
2016-06-23 22:00:00	0.777756	0.834574	0.931409	0.827768	0.764494	0.768941
2016-06-23 23:00:00	0.641347	0.685617	0.825481	0.688515	0.628073	0.631908
2016-06-24	0.826216	0.857948	0.97783	0.854758	0.817402	0.818848
2016-06-24 01:00:00	0.689512	0.740589	0.824083	0.705933	0.682127	0.682
2016-06-24 02:00:00	0.801863	0.821509	0.947039	0.839449	0.792447	0.793357
2016-06-24 03:00:00	0.876213	0.913706	1.01573	0.912566	0.865287	0.86744
2016-06-24 04:00:00	0.403459	0.438309	0.593816	0.407965	0.397723	0.396528
2016-06-24 05:00:00	0.418795	0.446331	0.59624	0.429483	0.411904	0.411965
2016-06-24 06:00:00	0.432896	0.458479	0.605339	0.438008	0.425795	0.425766
2016-06-24 07:00:00	0.336086	0.351448	0.565064	0.348326	0.329454	0.328761
2016-06-24 08:00:00	0.431547	0.455094	0.610965	0.438733	0.423283	0.424363
2016-06-24 09:00:00	0.464899	0.493522	0.624396	0.476421	0.455634	0.458084
2016-06-24 10:00:00	0.357977	0.370312	0.57074	0.365868	0.349862	0.350638
2016-06-24 11:00:00	0.856429	0.90392	0.963759	0.875446	0.8427	0.849195
2016-06-24 12:00:00	0.579895	0.621835	0.715436	0.58966	0.56865	0.572462
2016-06-24 13:00:00	0.336868	0.387697	0.556609	0.349008	0.330495	0.329861
2016-06-24 14:00:00	0.181141	0.249614	0.448179	0.197687	0.178097	0.174675
2016-06-24 15:00:00	0.505368	0.562058	0.623195	0.487885	0.494563	0.497993
2016-06-24 16:00:00	0.600836	0.674923	0.710113	0.592601	0.589068	0.594023
2016-06-24 17:00:00	0.108006	0.196604	0.41201	0.141365	0.106094	0.101719
2016-06-24 18:00:00	1.09962	1.15614	1.14166	1.12132	1.08789	1.09226
2016-06-24 19:00:00	1.06157	1.11525	1.16901	1.06058	1.04908	1.05445
2016-06-24 20:00:00	0.564029	0.627233	0.659147	0.569369	0.55189	0.557034
2016-06-24 21:00:00	0.477877	0.531146	0.603637	0.490912	0.466153	0.470646
2016-06-24 22:00:00	0.410198	0.467321	0.560035	0.439736	0.399278	0.403342
2016-06-24 23:00:00	0.356467	0.397021	0.57369	0.387664	0.34583	0.348859
2016-06-25	0.473539	0.526005	0.629805	0.480018	0.469658	0.467401
2016-06-25 01:00:00	0.885358	0.929428	1.02426	0.908172	0.876742	0.877387
2016-06-25 02:00:00	0.750301	0.79884	0.899783	0.760974	0.741575	0.742077
2016-06-25 03:00:00	0.372626	0.409731	0.576597	0.383369	0.368175	0.365639
2016-06-25 04:00:00	0.532387	0.582164	0.662046	0.538182	0.525097	0.52574
2016-06-25 05:00:00	0.483404	0.534267	0.631707	0.493925	0.476198	0.47668
2016-06-25 06:00:00	0.359832	0.389974	0.570798	0.369621	0.353434	0.352554
2016-06-25 07:00:00	0.428672	0.464412	0.602189	0.437886	0.42111	0.421471
2016-06-25 08:00:00	0.365778	0.397283	0.573251	0.380335	0.358747	0.358445
2016-06-25 09:00:00	0.377138	0.405928	0.579054	0.391481	0.369638	0.369853
2016-06-25 10:00:00	0.458383	0.495636	0.622592	0.47126	0.449598	0.451419
2016-06-25 11:00:00	0.534859	0.584247	0.684219	0.557141	0.525368	0.52777
2016-06-25 12:00:00	0.759234	0.807333	0.885363	0.779935	0.747036	0.752083
2016-06-25 13:00:00	0.183285	0.228333	0.445908	0.206367	0.180008	0.176725
2016-06-25 14:00:00	1.01514	1.0266	1.112	1.00959	1.0004	1.00875
2016-06-25 15:00:00	0.582249	0.61856	0.630223	0.555001	0.571342	0.575159
2016-06-25 16:00:00	0.292163	0.361265	0.509013	0.32062	0.287436	0.285663
2016-06-25 17:00:00	0.147003	0.188695	0.397797	0.18202	0.144596	0.140467
2016-06-25 18:00:00	0.15078	0.186251	0.408064	0.186848	0.147928	0.144057
2016-06-25 19:00:00	0.219792	0.259139	0.458396	0.244694	0.214108	0.212571
2016-06-25 20:00:00	0.212565	0.249307	0.45391	0.240705	0.205974	0.205421
2016-06-25 21:00:00	0.370246	0.420579	0.56084	0.392028	0.359444	0.362211
2016-06-25 22:00:00	0.396796	0.442809	0.554807	0.425099	0.384068	0.388841
2016-06-25 23:00:00	0.449566	0.49409	0.613772	0.48139	0.436442	0.441322
2016-06-26	0.439618	0.482705	0.609491	0.458627	0.435597	0.43306
2016-06-26 01:00:00	0.568913	0.607311	0.676894	0.575215	0.561435	0.561471
2016-06-26 02:00:00	0.455852	0.498921	0.618189	0.472035	0.449976	0.449154
2016-06-26 03:00:00	0.474361	0.512131	0.624306	0.485962	0.467987	0.467143
2016-06-26 04:00:00	0.452446	0.490619	0.615773	0.455567	0.44511	0.445469
2016-06-26 05:00:00	0.472774	0.499067	0.624416	0.477942	0.465391	0.465477
2016-06-26 06:00:00	0.416023	0.442499	0.597353	0.427392	0.409131	0.409148
2016-06-26 07:00:00	0.508784	0.544498	0.649206	0.516537	0.500361	0.501619
2016-06-26 08:00:00	0.334961	0.354946	0.561083	0.348981	0.328479	0.327672
2016-06-26 09:00:00	0.554376	0.591849	0.681198	0.561584	0.544782	0.547365
2016-06-26 10:00:00	0.347949	0.357261	0.568539	0.36266	0.340663	0.340743
2016-06-26 11:00:00	0.806015	0.825861	1.02597	0.805033	0.793203	0.799476
2016-06-26 12:00:00	0.277019	0.284343	0.498377	0.297198	0.270403	0.269688
2016-06-26 13:00:00	0.277087	0.30522	0.501052	0.293475	0.272168	0.270221
2016-06-26 14:00:00	0.114324	0.160044	0.384413	0.146522	0.113027	0.108391
2016-06-26 15:00:00	0.134774	0.189805	0.402937	0.165728	0.133223	0.128551
2016-06-26 16:00:00	0.0628425	0.104239	0.359984	0.102408	0.0619345	0.0568915
2016-06-26 17:00:00	0.111349	0.16851	0.39294	0.14795	0.109423	0.105388
2016-06-26 18:00:00	0.0744444	0.123301	0.365558	0.115101	0.0727446	0.0683587
2016-06-26 19:00:00	0.152416	0.200988	0.412794	0.192015	0.148636	0.146333
2016-06-26 20:00:00	0.21129	0.255588	0.460734	0.243615	0.20575	0.204689
2016-06-26 21:00:00	0.319524	0.358196	0.525266	0.35366	0.310768	0.312826
2016-06-26 22:00:00	0.461178	0.505957	0.607218	0.486247	0.450336	0.453991
2016-06-26 23:00:00	0.399575	0.437853	0.589643	0.432168	0.388746	0.39221
2016-06-27	0.418305	0.456233	0.603276	0.423618	0.415552	0.411959
2016-06-27 01:00:00	0.939742	0.984122	1.02989	0.937496	0.92991	0.932827
2016-06-27 02:00:00	0.91639	0.912552	1.0168	0.967012	0.906241	0.908979
2016-06-27 03:00:00	0.483068	0.51875	0.625353	0.482534	0.476876	0.475712
2016-06-27 04:00:00	0.480474	0.520474	0.62807	0.485179	0.474226	0.473521
2016-06-27 05:00:00	0.663732	0.705794	0.772393	0.695732	0.654178	0.655665
2016-06-27 06:00:00	0.558511	0.609754	0.677996	0.565074	0.550367	0.551581
2016-06-27 07:00:00	0.507146	0.549631	0.644534	0.515502	0.498955	0.500535
2016-06-27 08:00:00	0.427421	0.456656	0.602208	0.431426	0.419884	0.420252
2016-06-27 09:00:00	0.338825	0.359261	0.564259	0.348156	0.331837	0.331503
2016-06-27 10:00:00	0.421545	0.44977	0.601005	0.424747	0.413033	0.414339
2016-06-27 11:00:00	0.687922	0.734505	0.954557	0.697849	0.676082	0.680793
2016-06-27 12:00:00	0.518015	0.570107	0.666212	0.522927	0.507986	0.511365
2016-06-27 13:00:00	0.765249	0.836479	0.880921	0.774612	0.753248	0.758224
2016-06-27 14:00:00	0.586798	0.641758	0.68782	0.566183	0.575752	0.579342
2016-06-27 15:00:00	0.468111	0.54575	0.595484	0.46438	0.459477	0.460994
2016-06-27 16:00:00	0.282707	0.368386	0.509674	0.305037	0.277419	0.275522
2016-06-27 17:00:00	0.248781	0.324036	0.470795	0.276203	0.243526	0.241955
2016-06-27 18:00:00	0.261385	0.317224	0.485596	0.289554	0.255044	0.254144
2016-06-27 19:00:00	0.515531	0.563023	0.609628	0.531338	0.504356	0.507799
2016-06-27 20:00:00	0.497032	0.543621	0.629556	0.523195	0.486321	0.488779
2016-06-27 21:00:00	0.675229	0.721683	0.793322	0.69851	0.662616	0.66715
2016-06-27 22:00:00	3.01632	2.98056	2.89032	3.1347	3.02186	3.01756
2016-06-27 23:00:00	1.51915	1.52441	1.47568	1.53871	1.50371	1.51236
2016-06-28	1.70229	1.73401	1.60949	1.76327	1.69692	1.69831
2016-06-28 01:00:00	2.19932	2.20187	1.91876	2.2615	2.19522	2.19888
2016-06-28 02:00:00	1.02909	1.0424	1.10447	1.01889	1.01662	1.0212
2016-06-28 03:00:00	0.574656	0.617463	0.68057	0.57836	0.567348	0.567628
2016-06-28 04:00:00	0.541897	0.602645	0.669706	0.553757	0.535013	0.535589
2016-06-28 05:00:00	0.412179	0.459855	0.593102	0.426636	0.40654	0.405125
2016-06-28 06:00:00	0.484728	0.53385	0.63475	0.497156	0.477376	0.477962
2016-06-28 07:00:00	0.40945	0.444036	0.59763	0.419455	0.402514	0.402325
2016-06-28 08:00:00	0.370382	0.404206	0.577311	0.380098	0.363618	0.363122
2016-06-28 09:00:00	0.508733	0.559053	0.653471	0.515444	0.499416	0.501976
2016-06-28 10:00:00	0.355489	0.397195	0.572317	0.366269	0.347632	0.348259
2016-06-28 11:00:00	0.987434	1.06691	1.04737	1.01221	0.973449	0.981063
2016-06-28 12:00:00	0.489978	0.547166	0.639583	0.500377	0.480113	0.482584
2016-06-28 13:00:00	0.483034	0.548631	0.611623	0.500903	0.47325	0.475873
2016-06-28 14:00:00	0.282745	0.341639	0.495674	0.30861	0.27558	0.275357
2016-06-28 15:00:00	0.397301	0.458847	0.571365	0.420416	0.388368	0.389735
2016-06-28 16:00:00	0.338534	0.414536	0.54103	0.365782	0.331306	0.331862
2016-06-28 17:00:00	0.336291	0.413428	0.580078	0.375098	0.329615	0.329158
2016-06-28 18:00:00	0.281735	0.347031	0.499761	0.315233	0.275183	0.274735
2016-06-28 19:00:00	0.364416	0.408693	0.551531	0.396178	0.355645	0.356576
2016-06-28 20:00:00	0.4817	0.523267	0.615509	0.513861	0.471256	0.47395
2016-06-28 21:00:00	0.365896	0.398278	0.575083	0.40251	0.355987	0.357675
2016-06-28 22:00:00	0.698916	0.736459	0.800509	0.721429	0.684913	0.691439
2016-06-28 23:00:00	0.375624	0.407481	0.58014	0.418145	0.364851	0.367997
2016-06-29	0.418234	0.450461	0.597696	0.427839	0.414937	0.411487
2016-06-29 01:00:00	0.890729	0.942648	0.999204	0.92972	0.881271	0.882967
2016-06-29 02:00:00	0.7894	0.82667	0.93536	0.848274	0.780192	0.780401
2016-06-29 03:00:00	0.621589	0.670945	0.74236	0.648903	0.613214	0.614053
2016-06-29 04:00:00	0.52488	0.571363	0.662292	0.548751	0.517163	0.517895
2016-06-29 05:00:00	0.340789	0.368237	0.569185	0.373727	0.334818	0.333544
2016-06-29 06:00:00	0.567011	0.594863	0.694326	0.578636	0.556733	0.560009
2016-06-29 07:00:00	0.354172	0.387062	0.573272	0.406957	0.346603	0.346707
2016-06-29 08:00:00	0.41564	0.447422	0.596581	0.449618	0.408102	0.408568
2016-06-29 09:00:00	0.656894	0.699766	0.770139	0.682108	0.645574	0.650069
2016-06-29 10:00:00	0.748794	0.775809	0.853152	0.773641	0.735133	0.741657
2016-06-29 11:00:00	0.64539	0.68859	0.775537	0.672886	0.633373	0.637817
2016-06-29 12:00:00	0.794763	0.872014	0.930303	0.832003	0.78381	0.788214
2016-06-29 13:00:00	0.233884	0.280935	0.491	0.261028	0.228809	0.227123
2016-06-29 14:00:00	0.175349	0.237818	0.452564	0.204748	0.172287	0.169357
2016-06-29 15:00:00	0.262343	0.308595	0.54741	0.274946	0.259	0.255246
2016-06-29 16:00:00	0.462891	0.536563	0.69664	0.523686	0.456929	0.454941
2016-06-29 17:00:00	0.592346	0.648019	0.759371	0.631681	0.583747	0.58403
2016-06-29 18:00:00	0.13987	0.189479	0.396107	0.172748	0.136039	0.133624
2016-06-29 19:00:00	0.125929	0.169638	0.407976	0.167027	0.122621	0.119525
2016-06-29 20:00:00	0.227269	0.254172	0.47757	0.270152	0.221005	0.220777
2016-06-29 21:00:00	0.356364	0.380392	0.554206	0.394125	0.347079	0.349089
2016-06-29 22:00:00	0.406297	0.428925	0.581279	0.446104	0.395189	0.398984
2016-06-29 23:00:00	0.722894	0.768313	0.874864	0.77476	0.708742	0.715125
2016-06-30	0.57522	0.616958	0.704643	0.588172	0.569683	0.56854
2016-06-30 01:00:00	0.928594	0.949346	1.04427	0.994221	0.919394	0.920673
2016-06-30 02:00:00	0.69682	0.737832	0.841553	0.731497	0.689164	0.688419
2016-06-30 03:00:00	0.516678	0.55798	0.651976	0.536091	0.510692	0.509343
2016-06-30 04:00:00	0.730304	0.786009	0.849523	0.772677	0.720665	0.722432
2016-06-30 05:00:00	0.618491	0.673825	0.733922	0.635511	0.609907	0.611622
2016-06-30 06:00:00	0.342429	0.378152	0.56502	0.361173	0.336892	0.335339
2016-06-30 07:00:00	0.372986	0.414903	0.587327	0.392639	0.366299	0.365764
2016-06-30 08:00:00	0.432156	0.481167	0.609917	0.445605	0.424145	0.42509
2016-06-30 09:00:00	0.336767	0.377337	0.564041	0.356312	0.329616	0.329561
2016-06-30 10:00:00	0.641598	0.722311	0.76443	0.666111	0.630863	0.634801
2016-06-30 11:00:00	0.902349	0.978646	0.986791	0.938506	0.887687	0.896075
2016-06-30 12:00:00	0.472241	0.531479	0.651003	0.49051	0.462373	0.464632
2016-06-30 13:00:00	0.206278	0.271109	0.450734	0.236567	0.202001	0.199128
2016-06-30 14:00:00	0.165664	0.248656	0.424376	0.194665	0.162958	0.159088
2016-06-30 15:00:00	0.152508	0.242058	0.405157	0.188376	0.149969	0.146777
2016-06-30 16:00:00	0.123699	0.176735	0.384935	0.141332	0.119817	0.116858
2016-06-30 17:00:00	0.19306	0.269258	0.437144	0.227444	0.188828	0.186914
2016-06-30 18:00:00	0.149179	0.180839	0.403621	0.17835	0.144454	0.142079
2016-06-30 19:00:00	0.174465	0.225683	0.429985	0.21885	0.170651	0.168181
2016-06-30 20:00:00	0.206439	0.23868	0.453583	0.245774	0.200852	0.199528
2016-06-30 21:00:00	0.374336	0.416803	0.555462	0.416437	0.365559	0.367246
2016-06-30 22:00:00	0.574694	0.631644	0.710066	0.620039	0.563173	0.567022
2016-06-30 23:00:00	0.398466	0.437764	0.587684	0.444301	0.387642	0.390218
2016-07-01	0.438447	0.49303	0.612088	0.433806	0.436159	0.431048
2016-07-01 01:00:00	0.781266	0.812833	0.939016	0.791435	0.773834	0.772631
2016-07-01 02:00:00	1.0514	1.08264	1.14273	1.08709	1.0411	1.04201
2016-07-01 03:00:00	0.787611	0.832136	0.883753	0.753037	0.779277	0.780445
2016-07-01 04:00:00	1.00709	1.04262	1.09221	0.979544	0.998479	0.998953
2016-07-01 05:00:00	0.906795	0.959751	1.05274	0.880929	0.898729	0.899615
2016-07-01 06:00:00	0.339972	0.371599	0.56706	0.341925	0.335645	0.332515
2016-07-01 07:00:00	0.435951	0.477449	0.608442	0.427349	0.429852	0.428606
2016-07-01 08:00:00	0.314745	0.352236	0.551603	0.319501	0.309747	0.307155
2016-07-01 09:00:00	0.471984	0.528856	0.636812	0.463093	0.464394	0.464752
2016-07-01 10:00:00	0.426932	0.480283	0.608391	0.428169	0.419584	0.41981
2016-07-01 11:00:00	0.641197	0.695707	0.767277	0.643656	0.631716	0.633415
2016-07-01 12:00:00	0.758377	0.804818	0.88508	0.744673	0.746044	0.750362
2016-07-01 13:00:00	0.404722	0.448565	0.567857	0.378623	0.398235	0.396534
2016-07-01 14:00:00	0.565862	0.597326	0.700963	0.559905	0.556824	0.557063
2016-07-01 15:00:00	0.383394	0.41201	0.550769	0.378664	0.377748	0.375144
2016-07-01 16:00:00	0.295626	0.328629	0.521191	0.306208	0.29217	0.28747
2016-07-01 17:00:00	0.25433	0.286397	0.49928	0.265672	0.251257	0.247003
2016-07-01 18:00:00	0.353969	0.392176	0.586166	0.371332	0.348902	0.34632
2016-07-01 19:00:00	0.299852	0.321636	0.502298	0.317467	0.294399	0.291973
2016-07-01 20:00:00	0.629827	0.656376	0.75999	0.647907	0.620033	0.62022
2016-07-01 21:00:00	0.78145	0.785275	0.910111	0.793427	0.769161	0.773099
2016-07-01 22:00:00	0.665794	0.706311	0.813714	0.695116	0.655585	0.656968
2016-07-01 23:00:00	0.328711	0.338687	0.558552	0.37798	0.321581	0.320773
2016-07-02	0.483433	0.541638	0.640648	0.501031	0.480393	0.477234
2016-07-02 01:00:00	0.588622	0.651443	0.725885	0.596985	0.583701	0.581662
2016-07-02 02:00:00	0.792724	0.814062	0.938769	0.809409	0.784414	0.785014
2016-07-02 03:00:00	0.601299	0.658424	0.708334	0.60432	0.594857	0.594339
2016-07-02 04:00:00	0.367761	0.404565	0.578407	0.386196	0.36412	0.360422
2016-07-02 05:00:00	0.440557	0.481031	0.609144	0.443004	0.435484	0.433254
2016-07-02 06:00:00	0.456906	0.494696	0.617601	0.464947	0.450703	0.45003
2016-07-02 07:00:00	0.414678	0.453758	0.596761	0.415324	0.40923	0.407354
2016-07-02 08:00:00	0.379057	0.421359	0.579709	0.383635	0.373637	0.371636
2016-07-02 09:00:00	0.357409	0.400585	0.571353	0.36553	0.351908	0.349921
2016-07-02 10:00:00	0.435516	0.485309	0.610008	0.437059	0.428875	0.428219
2016-07-02 11:00:00	0.625086	0.687226	0.748538	0.636321	0.616017	0.617822
2016-07-02 12:00:00	0.55524	0.60378	0.697745	0.547556	0.546842	0.547354
2016-07-02 13:00:00	0.196362	0.23722	0.441053	0.208914	0.194479	0.188722
2016-07-02 14:00:00	0.126538	0.173383	0.388161	0.135104	0.127251	0.119847
2016-07-02 15:00:00	0.526728	0.54033	0.618521	0.490724	0.517966	0.518936
2016-07-02 16:00:00	0.306399	0.357947	0.544632	0.308545	0.303279	0.299369
2016-07-02 17:00:00	0.875451	0.909102	0.949934	0.859929	0.867873	0.866307
2016-07-02 18:00:00	0.524279	0.565359	0.708852	0.530937	0.519085	0.515028
2016-07-02 19:00:00	0.226337	0.271508	0.458694	0.238446	0.224061	0.219421
2016-07-02 20:00:00	0.0503042	0.0707742	0.360625	0.0910561	0.0510358	0.043337
2016-07-02 21:00:00	0.414336	0.454914	0.585392	0.420978	0.407116	0.406655
2016-07-02 22:00:00	0.310721	0.318722	0.515535	0.353811	0.303309	0.302629
2016-07-02 23:00:00	0.456493	0.470832	0.612824	0.486012	0.446754	0.448064
2016-07-03	0.393507	0.440162	0.587352	0.413669	0.390501	0.386468
2016-07-03 01:00:00	1.03428	1.0838	1.1347	1.04351	1.02388	1.02594
2016-07-03 02:00:00	0.52868	0.584294	0.705626	0.539851	0.522708	0.520046
2016-07-03 03:00:00	0.518944	0.560845	0.651618	0.528427	0.512674	0.511475
2016-07-03 04:00:00	0.333104	0.367349	0.559753	0.367566	0.329345	0.325591
2016-07-03 05:00:00	0.546093	0.598841	0.673652	0.553708	0.538836	0.538817
2016-07-03 06:00:00	0.423394	0.461786	0.600938	0.449886	0.417144	0.416183
2016-07-03 07:00:00	0.48414	0.517324	0.630989	0.488122	0.476709	0.476332
2016-07-03 08:00:00	0.319135	0.342639	0.550216	0.338484	0.313626	0.311123
2016-07-03 09:00:00	0.470238	0.503182	0.625178	0.480634	0.462484	0.462411
2016-07-03 10:00:00	0.327317	0.352578	0.55993	0.360123	0.321361	0.319514
2016-07-03 11:00:00	0.546746	0.590085	0.663141	0.550853	0.537423	0.539213
2016-07-03 12:00:00	0.374166	0.409399	0.579126	0.394527	0.367022	0.365755
2016-07-03 13:00:00	0.618405	0.678532	0.761648	0.618476	0.608866	0.61045
2016-07-03 14:00:00	0.571244	0.642205	0.74159	0.573036	0.562491	0.563335
2016-07-03 15:00:00	0.407487	0.456461	0.597088	0.416002	0.401547	0.399806
2016-07-03 16:00:00	0.0710522	0.101964	0.368504	0.120223	0.0726524	0.0645255
2016-07-03 17:00:00	0.213361	0.271647	0.490802	0.241658	0.211579	0.206673
2016-07-03 18:00:00	1.43723	1.4107	1.4163	1.42849	1.41864	1.42915
2016-07-03 19:00:00	0.699273	0.761619	0.858974	0.724152	0.68804	0.69126
2016-07-03 20:00:00	0.795239	0.830748	0.986459	0.797905	0.785688	0.787757
2016-07-03 21:00:00	0.946089	0.999809	1.11786	0.95815	0.936266	0.939247
2016-07-03 22:00:00	1.40427	1.37706	1.41823	1.37068	1.39087	1.39814
2016-07-03 23:00:00	0.817398	0.869555	0.954447	0.85231	0.804929	0.80952
2016-07-04	1.38663	1.44634	1.41878	1.40998	1.37379	1.38016
2016-07-04 01:00:00	1.48827	1.52283	1.49504	1.47902	1.4745	1.48246
2016-07-04 02:00:00	0.875197	0.910468	0.991217	0.872161	0.863908	0.867614
2016-07-04 03:00:00	0.714968	0.76614	0.832789	0.717077	0.705179	0.70739
2016-07-04 04:00:00	0.696312	0.75732	0.848134	0.704385	0.687516	0.689464
2016-07-04 05:00:00	0.335246	0.369072	0.557001	0.37401	0.330687	0.327815
2016-07-04 06:00:00	0.577502	0.62283	0.73318	0.578833	0.569035	0.570135
2016-07-04 07:00:00	0.371308	0.396783	0.576534	0.387552	0.365251	0.363595
2016-07-04 08:00:00	0.413447	0.436134	0.595672	0.414419	0.406223	0.405594
2016-07-04 09:00:00	0.411022	0.435138	0.594288	0.404896	0.403665	0.403111
2016-07-04 10:00:00	0.35745	0.379952	0.571206	0.350058	0.350768	0.349548
2016-07-04 11:00:00	0.528595	0.574235	0.648363	0.509003	0.519269	0.521152
2016-07-04 12:00:00	0.919504	0.995036	1.07737	0.930337	0.907226	0.911627
2016-07-04 13:00:00	1.4377	1.43367	1.47317	1.4227	1.42077	1.43143
2016-07-04 14:00:00	1.48061	1.45998	1.51871	1.44158	1.4617	1.4742
2016-07-04 15:00:00	1.5278	1.52383	1.54675	1.49846	1.50923	1.52145
2016-07-04 16:00:00	1.17287	1.18164	1.21793	1.16327	1.16126	1.16469
2016-07-04 17:00:00	0.782443	0.831655	0.8924	0.820036	0.774502	0.772837
2016-07-04 18:00:00	0.208838	0.213761	0.417911	0.203867	0.204943	0.201519
2016-07-04 19:00:00	0.386217	0.41054	0.559858	0.373261	0.379617	0.378541
2016-07-04 20:00:00	0.277516	0.310258	0.496139	0.282431	0.27184	0.27017
2016-07-04 21:00:00	0.349079	0.372682	0.554535	0.358824	0.341989	0.34127
2016-07-04 22:00:00	0.693792	0.699887	0.778935	0.698042	0.680678	0.685462
2016-07-04 23:00:00	0.755347	0.756025	0.81611	0.741461	0.74143	0.746184
2016-07-05	0.73527	0.796498	0.896631	0.721626	0.72761	0.727346
2016-07-05 01:00:00	0.855969	0.855774	0.990849	0.863573	0.846067	0.847872
2016-07-05 02:00:00	0.679635	0.722021	0.834078	0.646574	0.670868	0.670993
2016-07-05 03:00:00	0.489583	0.525353	0.637098	0.471494	0.484135	0.482256
2016-07-05 04:00:00	0.717637	0.766458	0.887383	0.705878	0.70875	0.711419
2016-07-05 05:00:00	0.447953	0.49289	0.61433	0.439167	0.442456	0.440908
2016-07-05 06:00:00	0.442032	0.491721	0.609737	0.441725	0.435879	0.435209
2016-07-05 07:00:00	0.426281	0.478081	0.604663	0.413078	0.420082	0.419053
2016-07-05 08:00:00	0.365839	0.410795	0.576553	0.354078	0.359576	0.358363
2016-07-05 09:00:00	0.386304	0.427972	0.584797	0.371818	0.379392	0.378865
2016-07-05 10:00:00	0.441569	0.485593	0.592286	0.429583	0.433636	0.433972
2016-07-05 11:00:00	1.27982	1.33834	1.32722	1.28437	1.26425	1.27389
2016-07-05 12:00:00	0.740536	0.810499	0.866559	0.723036	0.729431	0.733077
2016-07-05 13:00:00	0.436499	0.476964	0.604992	0.42275	0.428705	0.428558
2016-07-05 14:00:00	0.3161	0.350035	0.538349	0.316409	0.311083	0.30919
2016-07-05 15:00:00	0.145289	0.173197	0.431533	0.153875	0.14409	0.13842
2016-07-05 16:00:00	0.176565	0.195404	0.448783	0.192798	0.173982	0.169889
2016-07-05 17:00:00	0.11116	0.131447	0.399598	0.130635	0.110673	0.104497
2016-07-05 18:00:00	0.127004	0.144915	0.412956	0.153061	0.125863	0.120669
2016-07-05 19:00:00	0.138203	0.148978	0.422408	0.163202	0.136709	0.131493
2016-07-05 20:00:00	0.252408	0.272602	0.488947	0.281029	0.248499	0.245884
2016-07-05 21:00:00	0.318194	0.336087	0.5284	0.338919	0.312117	0.311129
2016-07-05 22:00:00	0.626755	0.668607	0.760141	0.64157	0.616357	0.618945
2016-07-05 23:00:00	0.492276	0.516872	0.64754	0.511343	0.482802	0.483675
2016-07-06	0.577698	0.643575	0.70141	0.574112	0.572978	0.570573
2016-07-06 01:00:00	0.479955	0.529981	0.641301	0.469935	0.475659	0.472152
2016-07-06 02:00:00	0.945818	0.979658	1.05565	0.935247	0.935645	0.93793
2016-07-06 03:00:00	0.781763	0.821138	0.908261	0.766395	0.771638	0.773083
2016-07-06 04:00:00	0.895303	0.948048	1.10897	0.861686	0.883877	0.888972
2016-07-06 05:00:00	0.392812	0.445232	0.591342	0.384373	0.387356	0.385753
2016-07-06 06:00:00	0.426494	0.484005	0.606123	0.413404	0.420222	0.419342
2016-07-06 07:00:00	0.356722	0.406498	0.573573	0.35067	0.350587	0.349355
2016-07-06 08:00:00	0.453185	0.513114	0.61945	0.438332	0.44548	0.445847
2016-07-06 09:00:00	0.378397	0.429127	0.58068	0.380805	0.371144	0.371041
2016-07-06 10:00:00	0.582115	0.648222	0.686794	0.574764	0.572427	0.575113
2016-07-06 11:00:00	1.02456	1.08062	1.24403	1.03792	1.01027	1.01785
2016-07-06 12:00:00	0.773627	0.840413	0.893878	0.76394	0.762523	0.766188
2016-07-06 13:00:00	0.474707	0.511614	0.622668	0.487247	0.467605	0.465905
2016-07-06 14:00:00	0.311414	0.372732	0.545042	0.303529	0.30833	0.304158
2016-07-06 15:00:00	0.684036	0.747913	0.863351	0.731302	0.677607	0.674504
2016-07-06 16:00:00	0.557779	0.629218	0.730536	0.571053	0.553022	0.549842
2016-07-06 17:00:00	0.0830803	0.11633	0.361316	0.100801	0.0831458	0.075517
2016-07-06 18:00:00	0.358483	0.401354	0.550458	0.365147	0.353261	0.350832
2016-07-06 19:00:00	0.113494	0.143755	0.386291	0.138067	0.112326	0.105861
2016-07-06 20:00:00	0.379891	0.414409	0.565718	0.389834	0.37344	0.372135
2016-07-06 21:00:00	1.21533	1.21093	1.23539	1.19827	1.19919	1.20811
2016-07-06 22:00:00	1.01703	1.05063	1.0644	1.01954	1.00271	1.00991
2016-07-06 23:00:00	7.43007	7.33698	6.78577	7.13438	7.4467	7.43153
2016-07-07	7.15796	6.94	6.76216	6.85361	7.14515	7.16405
2016-07-07 01:00:00	6.8834	6.68292	6.5964	6.71009	6.88032	6.89984
2016-07-07 02:00:00	2.76212	2.74179	2.75232	2.75105	2.75371	2.76102
2016-07-07 03:00:00	2.65332	2.6393	2.60401	2.66279	2.64386	2.6531
2016-07-07 04:00:00	1.60845	1.61394	1.59618	1.58484	1.59125	1.60222
2016-07-07 05:00:00	1.0313	1.05931	1.11539	0.993885	1.01616	1.0236
2016-07-07 06:00:00	1.2909	1.29333	1.33289	1.24781	1.27308	1.2834
2016-07-07 07:00:00	0.853865	0.882303	0.934026	0.8194	0.839442	0.846216
2016-07-07 08:00:00	0.451997	0.483009	0.622431	0.442013	0.443389	0.444231
2016-07-07 09:00:00	0.957066	0.972558	1.06332	0.922573	0.9413	0.949388
2016-07-07 10:00:00	0.314185	0.339963	0.557709	0.323874	0.307844	0.30664
2016-07-07 11:00:00	0.857727	0.920993	0.976228	0.860045	0.84569	0.850407
2016-07-07 12:00:00	0.673696	0.729036	0.807726	0.664528	0.66365	0.665953
2016-07-07 13:00:00	0.395065	0.432321	0.611861	0.374253	0.389074	0.387899
2016-07-07 14:00:00	0.816933	0.836146	0.968646	0.830614	0.807661	0.80714
2016-07-07 15:00:00	0.709812	0.75799	0.859403	0.706083	0.702006	0.702197
2016-07-07 16:00:00	0.200112	0.215597	0.463322	0.219957	0.196013	0.192691
2016-07-07 17:00:00	0.378766	0.41161	0.56194	0.387899	0.371645	0.371577
2016-07-07 18:00:00	0.234969	0.253931	0.477851	0.253088	0.230253	0.22757
2016-07-07 19:00:00	0.454229	0.470065	0.60747	0.46083	0.443176	0.44627
2016-07-07 20:00:00	0.36259	0.376216	0.552498	0.37916	0.354565	0.354759
2016-07-07 21:00:00	0.341689	0.358691	0.529687	0.368298	0.334439	0.334358
2016-07-07 22:00:00	1.09714	1.11198	1.15179	1.09051	1.07837	1.08926
2016-07-07 23:00:00	0.953067	0.962468	1.04777	0.958684	0.936036	0.944926
2016-07-08	0.778442	0.800004	0.87205	0.775134	0.767868	0.7712
2016-07-08 01:00:00	0.885516	0.913226	0.970882	0.867681	0.873065	0.878291
2016-07-08 02:00:00	4.39993	4.37237	4.34425	4.39403	4.40507	4.41026
2016-07-08 03:00:00	2.6137	2.58044	2.63376	2.61091	2.60261	2.61224
2016-07-08 04:00:00	1.53613	1.52119	1.52811	1.5026	1.51734	1.52889
2016-07-08 05:00:00	1.4497	1.4331	1.45988	1.41415	1.43185	1.44214
2016-07-08 06:00:00	0.949769	0.96188	1.04404	0.921932	0.93479	0.941884
2016-07-08 07:00:00	0.922345	0.923916	1.00761	0.890146	0.90697	0.913942
2016-07-08 08:00:00	0.959785	0.97071	1.04629	0.933542	0.94276	0.951076
2016-07-08 09:00:00	0.891174	0.9082	0.964506	0.866293	0.873228	0.881816
2016-07-08 10:00:00	1.14847	1.19276	1.18012	1.14765	1.13102	1.14023
2016-07-08 11:00:00	0.733374	0.774955	0.86693	0.735588	0.719951	0.725304
2016-07-08 12:00:00	2.64816	2.65685	2.66627	2.67706	2.64208	2.64722
2016-07-08 13:00:00	3.40347	3.37563	3.45057	3.43495	3.40888	3.40626
2016-07-08 14:00:00	1.19591	1.16964	1.23106	1.17377	1.17984	1.18792
2016-07-08 15:00:00	0.235887	0.267514	0.493309	0.273775	0.232609	0.228605
2016-07-08 16:00:00	0.585839	0.62863	0.768376	0.604364	0.577455	0.578913
2016-07-08 17:00:00	0.636562	0.67932	0.820411	0.686657	0.629248	0.628085
2016-07-08 18:00:00	0.738379	0.767711	0.903372	0.759508	0.729659	0.731439
2016-07-08 19:00:00	0.450908	0.483824	0.6425	0.488526	0.443003	0.443602
2016-07-08 20:00:00	0.408758	0.433577	0.572667	0.443797	0.399824	0.401386
2016-07-08 21:00:00	0.398359	0.423043	0.582717	0.420167	0.388597	0.390436
2016-07-08 22:00:00	0.485954	0.512407	0.634479	0.501478	0.474879	0.477819
2016-07-08 23:00:00	0.391373	0.419374	0.585399	0.417043	0.380904	0.38351
2016-07-09	0.486731	0.552767	0.635667	0.476773	0.482108	0.479841
2016-07-09 01:00:00	0.420564	0.486234	0.603561	0.422533	0.416101	0.414029
2016-07-09 02:00:00	0.470297	0.539614	0.627877	0.461781	0.464775	0.46326
2016-07-09 03:00:00	0.497422	0.563472	0.639948	0.492822	0.490177	0.490593
2016-07-09 04:00:00	0.542152	0.597331	0.666599	0.524759	0.53383	0.534837
2016-07-09 05:00:00	0.53634	0.592431	0.663307	0.518773	0.527275	0.529317
2016-07-09 06:00:00	0.484656	0.529379	0.634492	0.463404	0.475974	0.477079
2016-07-09 07:00:00	0.652911	0.706435	0.778138	0.635812	0.641985	0.645644
2016-07-09 08:00:00	0.689324	0.723894	0.812411	0.695693	0.677301	0.680661
2016-07-09 09:00:00	0.634354	0.68159	0.742977	0.620748	0.623112	0.626772
2016-07-09 10:00:00	0.376369	0.404086	0.577989	0.38041	0.368071	0.368426
2016-07-09 11:00:00	0.556496	0.58956	0.672731	0.548343	0.546118	0.548841
2016-07-09 12:00:00	0.406132	0.426258	0.582112	0.404599	0.397474	0.398469
2016-07-09 13:00:00	0.750588	0.805393	0.874099	0.766357	0.739177	0.742849
2016-07-09 14:00:00	0.650271	0.669724	0.751912	0.656245	0.638696	0.642753
2016-07-09 15:00:00	0.697838	0.708337	0.802397	0.694349	0.685377	0.690012
2016-07-09 16:00:00	0.353558	0.367822	0.554453	0.367281	0.34565	0.345915
2016-07-09 17:00:00	0.432086	0.452796	0.600697	0.448389	0.423027	0.424907
2016-07-09 18:00:00	0.48795	0.524401	0.62331	0.507458	0.478485	0.480739
2016-07-09 19:00:00	0.291157	0.290812	0.533669	0.309384	0.282738	0.283027
2016-07-09 20:00:00	0.61544	0.641747	0.719309	0.613033	0.602343	0.607452
2016-07-09 21:00:00	0.444303	0.449718	0.635777	0.444098	0.432786	0.435955
2016-07-09 22:00:00	0.685192	0.711207	0.785918	0.687729	0.6714	0.677106
2016-07-09 23:00:00	0.575007	0.594668	0.676002	0.574351	0.561691	0.56643
2016-07-10	1.07455	1.13618	1.11685	1.08329	1.06324	1.06631
2016-07-10 01:00:00	1.12914	1.16094	1.23845	1.19133	1.11653	1.12012
2016-07-10 02:00:00	1.31149	1.33109	1.38201	1.32822	1.29754	1.30492
2016-07-10 03:00:00	1.22637	1.25515	1.17637	1.21361	1.211	1.21945
2016-07-10 04:00:00	0.607031	0.662553	0.708575	0.5801	0.597315	0.599504
2016-07-10 05:00:00	0.487512	0.537836	0.636817	0.477727	0.478946	0.480409
2016-07-10 06:00:00	0.518841	0.566137	0.65358	0.497166	0.509787	0.511352
2016-07-10 07:00:00	0.396573	0.446002	0.587434	0.397336	0.389491	0.389117
2016-07-10 08:00:00	0.482575	0.517631	0.627229	0.466154	0.473544	0.474918
2016-07-10 09:00:00	0.545966	0.588263	0.665336	0.541826	0.536045	0.538958
2016-07-10 10:00:00	0.401409	0.426338	0.588313	0.406678	0.393165	0.393796
2016-07-10 11:00:00	0.405594	0.430387	0.578793	0.405903	0.396982	0.397934
2016-07-10 12:00:00	0.839749	0.884795	0.957269	0.833152	0.825946	0.832133
2016-07-10 13:00:00	0.730976	0.759066	0.826426	0.703823	0.716937	0.722568
2016-07-10 14:00:00	0.815812	0.846074	0.913412	0.795828	0.802347	0.80777
2016-07-10 15:00:00	0.63657	0.638696	0.724516	0.617809	0.623604	0.627901
2016-07-10 16:00:00	0.34619	0.37229	0.541139	0.336761	0.339179	0.338912
2016-07-10 17:00:00	0.231938	0.259167	0.470157	0.246779	0.227178	0.224852
2016-07-10 18:00:00	0.181829	0.202286	0.449495	0.214348	0.17752	0.174701
2016-07-10 19:00:00	0.30684	0.339541	0.517974	0.33213	0.300251	0.299676
2016-07-10 20:00:00	0.240055	0.262211	0.48091	0.268478	0.233799	0.232606
2016-07-10 21:00:00	0.396671	0.427777	0.585475	0.413523	0.386532	0.389077
2016-07-10 22:00:00	0.429576	0.463362	0.626312	0.440113	0.418642	0.42151
2016-07-10 23:00:00	0.446126	0.495833	0.613603	0.462026	0.434741	0.438291
2016-07-11	0.784094	0.867289	0.919813	0.77687	0.775202	0.775812
2016-07-11 01:00:00	0.734323	0.793581	0.899208	0.75059	0.72539	0.725967
2016-07-11 02:00:00	0.682522	0.769506	0.846194	0.674332	0.673183	0.675013
2016-07-11 03:00:00	0.438731	0.504446	0.611967	0.42689	0.432697	0.431605
2016-07-11 04:00:00	0.41057	0.471289	0.598541	0.405296	0.404305	0.403538
2016-07-11 05:00:00	0.429606	0.484442	0.60855	0.420153	0.422723	0.422572
2016-07-11 06:00:00	0.405321	0.453326	0.592212	0.394782	0.398573	0.398044
2016-07-11 07:00:00	0.330621	0.358219	0.561287	0.329607	0.324505	0.323117
2016-07-11 08:00:00	0.509532	0.550626	0.651414	0.501226	0.500433	0.502496
2016-07-11 09:00:00	0.33377	0.358817	0.558471	0.339261	0.32697	0.326344
2016-07-11 10:00:00	0.346086	0.369362	0.56246	0.348863	0.3388	0.338573
2016-07-11 11:00:00	0.415471	0.447146	0.579314	0.414221	0.407233	0.408248
2016-07-11 12:00:00	0.358297	0.396471	0.58394	0.375003	0.351637	0.350837
2016-07-11 13:00:00	0.279923	0.305636	0.530116	0.297477	0.275092	0.272813
2016-07-11 14:00:00	0.598371	0.635255	0.718495	0.587397	0.588508	0.590631
2016-07-11 15:00:00	0.500825	0.523603	0.641698	0.503918	0.491555	0.492116
2016-07-11 16:00:00	0.623624	0.676125	0.766305	0.625078	0.614087	0.615217
2016-07-11 17:00:00	0.373296	0.400522	0.537426	0.370982	0.366271	0.365137
2016-07-11 18:00:00	0.443702	0.482941	0.581753	0.430703	0.435582	0.435549
2016-07-11 19:00:00	0.614455	0.6469	0.713849	0.614498	0.603182	0.605645
2016-07-11 20:00:00	0.404309	0.453975	0.589155	0.424263	0.396341	0.395909
2016-07-11 21:00:00	0.755644	0.808973	0.898512	0.767565	0.742678	0.747038
2016-07-11 22:00:00	1.64757	1.66305	1.60834	1.68539	1.63079	1.64136
2016-07-11 23:00:00	1.05089	1.07383	1.09441	1.04416	1.0317	1.04182
2016-07-12	0.816703	0.880043	0.938922	0.792221	0.805343	0.808546
2016-07-12 01:00:00	1.63487	1.68047	1.55039	1.62056	1.62319	1.6292
2016-07-12 02:00:00	1.4929	1.5368	1.49222	1.54876	1.48345	1.48615
2016-07-12 03:00:00	0.714704	0.749788	0.853426	0.697256	0.704751	0.706819
2016-07-12 04:00:00	0.418144	0.457647	0.597125	0.414268	0.412362	0.410898
2016-07-12 05:00:00	0.397743	0.433303	0.587175	0.395753	0.391781	0.390448
2016-07-12 06:00:00	0.491122	0.533435	0.636739	0.488797	0.483101	0.484159
2016-07-12 07:00:00	0.465517	0.502905	0.623053	0.464239	0.457542	0.458427
2016-07-12 08:00:00	0.386055	0.411052	0.581939	0.385548	0.378775	0.378593
2016-07-12 09:00:00	0.484506	0.507942	0.626744	0.48447	0.475389	0.476766
2016-07-12 10:00:00	0.987722	1.01192	1.06675	0.995342	0.973476	0.98042
2016-07-12 11:00:00	0.840095	0.904381	0.959075	0.844766	0.828095	0.832862
2016-07-12 12:00:00	0.47013	0.492368	0.630272	0.468186	0.461014	0.461863
2016-07-12 13:00:00	0.321798	0.355161	0.542513	0.324607	0.316485	0.314082
2016-07-12 14:00:00	0.244044	0.289876	0.486468	0.243288	0.240906	0.237322
2016-07-12 15:00:00	0.137244	0.173257	0.397079	0.147789	0.136036	0.130587
2016-07-12 16:00:00	0.311728	0.362989	0.525091	0.325427	0.30677	0.30413
2016-07-12 17:00:00	0.0915964	0.12795	0.375184	0.113212	0.0909332	0.0849944
2016-07-12 18:00:00	0.0807206	0.114122	0.366794	0.109905	0.0795522	0.0743814
2016-07-12 19:00:00	0.157385	0.187346	0.419044	0.177608	0.153855	0.150291
2016-07-12 20:00:00	0.273402	0.310737	0.493709	0.29148	0.267333	0.266538
2016-07-12 21:00:00	0.218704	0.235101	0.463645	0.248641	0.211859	0.211199
2016-07-12 22:00:00	0.511281	0.552764	0.648984	0.522206	0.49936	0.503709
2016-07-12 23:00:00	0.521196	0.561619	0.704917	0.533687	0.508824	0.513193
2016-07-13	0.723604	0.794327	0.883743	0.723287	0.715792	0.715715
2016-07-13 01:00:00	0.699508	0.7445	0.858189	0.711747	0.690213	0.691668
2016-07-13 02:00:00	0.878249	0.941828	0.965395	0.860096	0.867264	0.870697
2016-07-13 03:00:00	0.553799	0.610653	0.712263	0.531728	0.546118	0.546791
2016-07-13 04:00:00	0.402931	0.451474	0.589746	0.401061	0.397001	0.396026
2016-07-13 05:00:00	0.449232	0.493023	0.613791	0.433752	0.442472	0.442083
2016-07-13 06:00:00	0.371061	0.403555	0.57593	0.362079	0.364855	0.363742
2016-07-13 07:00:00	0.438437	0.461616	0.604345	0.422831	0.430459	0.430937
2016-07-13 08:00:00	0.546435	0.572391	0.659669	0.527389	0.536055	0.539253
2016-07-13 09:00:00	0.416941	0.428946	0.595961	0.403311	0.407732	0.409257
2016-07-13 10:00:00	0.543912	0.569873	0.664806	0.528753	0.533231	0.536523
2016-07-13 11:00:00	0.859257	0.890011	1.03422	0.870529	0.845998	0.851526
2016-07-13 12:00:00	0.927592	0.981573	1.00151	0.940824	0.914136	0.920972
2016-07-13 13:00:00	0.300676	0.34054	0.549538	0.301993	0.294987	0.292639
2016-07-13 14:00:00	0.315921	0.355115	0.517109	0.316725	0.31069	0.308144
2016-07-13 15:00:00	0.224365	0.264434	0.461702	0.234839	0.220465	0.216706
2016-07-13 16:00:00	0.570869	0.661382	0.7226	0.578016	0.562622	0.563796
2016-07-13 17:00:00	0.843305	0.906916	0.962301	0.880659	0.833657	0.833728
2016-07-13 18:00:00	0.656931	0.746231	0.79353	0.671249	0.647965	0.64792
2016-07-13 19:00:00	2.33336	2.30944	2.32976	2.3717	2.32251	2.32958
2016-07-13 20:00:00	4.28485	4.31766	4.27177	4.36943	4.30643	4.29359
2016-07-13 21:00:00	3.51257	3.52127	3.40443	3.58729	3.52137	3.51644
2016-07-13 22:00:00	2.87701	2.89385	2.79689	2.94794	2.87525	2.87704
2016-07-13 23:00:00	7.65467	7.61394	6.91486	7.39867	7.66264	7.65111
2016-07-14	3.10658	3.10798	2.94043	3.1552	3.10367	3.10946
2016-07-14 01:00:00	1.83875	1.84161	1.74681	1.83766	1.82373	1.83359
2016-07-14 02:00:00	1.41231	1.40368	1.4985	1.42779	1.39791	1.40589
2016-07-14 03:00:00	2.09888	2.09236	2.2429	2.09272	2.08502	2.09463
2016-07-14 04:00:00	1.48179	1.47656	1.47109	1.45235	1.466	1.47473
2016-07-14 05:00:00	0.69061	0.732455	0.781044	0.675457	0.680467	0.682953
2016-07-14 06:00:00	0.871941	0.870458	0.935475	0.829348	0.857232	0.863355
2016-07-14 07:00:00	1.08247	1.09865	1.16726	1.05088	1.06697	1.07529
2016-07-14 08:00:00	0.856112	0.851626	0.918522	0.815455	0.840614	0.847561
2016-07-14 09:00:00	0.492604	0.520237	0.63563	0.485045	0.483329	0.485318
2016-07-14 10:00:00	0.976392	0.97616	1.07219	0.940191	0.960124	0.968576
2016-07-14 11:00:00	0.954594	0.982491	1.16306	0.968679	0.940246	0.946904
2016-07-14 12:00:00	1.00988	1.06758	1.09705	1.0182	0.995457	1.00327
2016-07-14 13:00:00	0.537741	0.560485	0.680716	0.534806	0.526601	0.529618
2016-07-14 14:00:00	0.537422	0.573569	0.637858	0.534687	0.527064	0.529335
2016-07-14 15:00:00	0.413069	0.44876	0.585645	0.412277	0.404856	0.404959
2016-07-14 16:00:00	0.697186	0.7488	0.787105	0.718036	0.684597	0.687919
2016-07-14 17:00:00	0.549976	0.591609	0.685613	0.546032	0.538426	0.541709
2016-07-14 18:00:00	0.521188	0.579185	0.683635	0.525257	0.51026	0.513831
2016-07-14 19:00:00	1.34805	1.34072	1.35565	1.32372	1.32882	1.33911
2016-07-14 20:00:00	3.76548	3.75642	3.56327	3.86129	3.78008	3.77211
2016-07-14 21:00:00	2.84423	2.8412	2.97467	2.8891	2.84159	2.84515
2016-07-14 22:00:00	2.29707	2.31494	2.42203	2.36207	2.28841	2.29396
2016-07-14 23:00:00	1.74042	1.74671	1.7071	1.75601	1.72401	1.73372
2016-07-15	2.07548	2.07935	2.15767	2.09511	2.06279	2.07189
2016-07-15 01:00:00	1.84708	1.83114	1.7848	1.86068	1.83229	1.84421
2016-07-15 02:00:00	5.15241	5.04171	4.70345	5.10527	5.17484	5.17052
2016-07-15 03:00:00	2.04128	2.0025	1.83306	1.96848	2.03025	2.03855
2016-07-15 04:00:00	1.71185	1.70311	1.6418	1.66909	1.70009	1.7075
2016-07-15 05:00:00	1.1974	1.17622	1.28764	1.10409	1.18402	1.19115
2016-07-15 06:00:00	0.950507	0.949148	1.03269	0.916874	0.935695	0.942557
2016-07-15 07:00:00	0.933765	0.932353	1.01189	0.905752	0.918246	0.925874
2016-07-15 08:00:00	0.502056	0.527002	0.639335	0.496828	0.493012	0.494462
2016-07-15 09:00:00	1.06825	1.07553	1.15933	1.04759	1.05228	1.06083
2016-07-15 10:00:00	1.50301	1.47061	1.47599	1.50804	1.48559	1.49549
2016-07-15 11:00:00	1.00616	1.04305	1.05347	1.01132	0.991628	0.998936
2016-07-15 12:00:00	0.641093	0.682541	0.756115	0.639632	0.629932	0.633328
2016-07-15 13:00:00	0.304216	0.334495	0.490221	0.315492	0.298236	0.296773
2016-07-15 14:00:00	0.313785	0.356391	0.530935	0.320148	0.30842	0.306182
2016-07-15 15:00:00	0.264101	0.318222	0.484319	0.275203	0.25892	0.256917
2016-07-15 16:00:00	2.01432	1.97957	2.05854	2.03616	1.99945	2.00898
2016-07-15 17:00:00	2.35988	2.33336	2.42606	2.40037	2.34757	2.35663
2016-07-15 18:00:00	2.37983	2.34686	2.35776	2.42795	2.3674	2.37607
2016-07-15 19:00:00	2.17087	2.15306	2.26373	2.20075	2.15549	2.16625
2016-07-15 20:00:00	2.71952	2.661	2.78285	2.77637	2.71369	2.72006
2016-07-15 21:00:00	3.12974	3.06461	3.15173	3.19729	3.13183	3.13589
2016-07-15 22:00:00	3.11019	3.12579	2.94358	3.18383	3.11347	3.11237
2016-07-15 23:00:00	8.38535	8.20172	7.76864	8.0337	8.35806	8.36501
2016-07-16	5.82507	5.83863	5.80911	5.70203	5.8396	5.83858
2016-07-16 01:00:00	2.54539	2.53253	2.56758	2.55334	2.53468	2.54328
2016-07-16 02:00:00	1.22685	1.23917	1.29039	1.246	1.21296	1.21855
2016-07-16 03:00:00	3.94408	3.94104	3.8692	3.94645	3.95304	3.9521
2016-07-16 04:00:00	1.56445	1.55464	1.54471	1.54706	1.54761	1.55797
2016-07-16 05:00:00	1.00111	1.01433	1.10194	0.978343	0.986009	0.993456
2016-07-16 06:00:00	0.903092	0.910112	0.993423	0.877828	0.888135	0.894957
2016-07-16 07:00:00	0.917105	0.920743	1.0021	0.891979	0.901797	0.908868
2016-07-16 08:00:00	0.986307	0.992293	1.08772	0.964248	0.970152	0.97849
2016-07-16 09:00:00	0.439195	0.457994	0.604147	0.440651	0.43014	0.431339
2016-07-16 10:00:00	1.57908	1.54691	1.54319	1.55864	1.5604	1.57193
2016-07-16 11:00:00	0.679619	0.700161	0.78218	0.677162	0.666919	0.671888
2016-07-16 12:00:00	0.597025	0.634926	0.726169	0.597077	0.586164	0.589462
2016-07-16 13:00:00	0.409038	0.453947	0.599504	0.41155	0.401039	0.4019
2016-07-16 14:00:00	0.632598	0.687827	0.842142	0.641959	0.623651	0.623827
2016-07-16 15:00:00	1.09925	1.14738	1.1851	1.11075	1.08682	1.09258
2016-07-16 16:00:00	0.85282	0.898696	0.971836	0.830461	0.840624	0.844968
2016-07-16 17:00:00	1.8824	1.876	1.84135	1.90366	1.86535	1.87711
2016-07-16 18:00:00	3.58884	3.5869	3.38491	3.7002	3.59547	3.59357
2016-07-16 19:00:00	3.50822	3.51047	3.41112	3.61747	3.51518	3.51287
2016-07-16 20:00:00	3.87292	3.90089	2.96738	4.04469	3.88642	3.88365
2016-07-16 21:00:00	2.71077	2.70452	2.7108	2.78341	2.70434	2.7102
2016-07-16 22:00:00	0.97308	0.947316	1.03938	0.952703	0.953012	0.963641
2016-07-16 23:00:00	0.732526	0.769169	0.876299	0.74403	0.717634	0.724482
2016-07-17	0.637049	0.672367	0.744006	0.622771	0.629325	0.630086
2016-07-17 01:00:00	1.0581	1.10138	1.1229	1.08034	1.04779	1.05038
2016-07-17 02:00:00	0.892793	0.896248	1.01401	0.941471	0.882822	0.884956
2016-07-17 03:00:00	3.21661	3.16917	2.92074	3.31141	3.21605	3.21901
2016-07-17 04:00:00	1.59167	1.58071	1.58379	1.57575	1.57503	1.58545
2016-07-17 05:00:00	0.895084	0.883854	0.970003	0.85729	0.879551	0.886466
2016-07-17 06:00:00	1.19075	1.18093	1.20603	1.15999	1.17295	1.18304
2016-07-17 07:00:00	0.923951	0.936676	1.01221	0.909267	0.910404	0.916165
2016-07-17 08:00:00	0.42054	0.460998	0.602594	0.441299	0.413278	0.413478
2016-07-17 09:00:00	0.415922	0.446336	0.604011	0.423163	0.408086	0.408507
2016-07-17 10:00:00	1.49522	1.47312	1.48648	1.46759	1.47639	1.48776
2016-07-17 11:00:00	0.79661	0.804526	0.839693	0.776304	0.78139	0.788688
2016-07-17 12:00:00	0.932652	0.934693	1.02364	0.913706	0.916466	0.924305
2016-07-17 13:00:00	0.340263	0.379516	0.57965	0.350871	0.333551	0.333057
2016-07-17 14:00:00	0.254413	0.327552	0.48902	0.250104	0.250235	0.248241
2016-07-17 15:00:00	0.271862	0.315631	0.468743	0.266695	0.264918	0.264585
2016-07-17 16:00:00	0.611975	0.673753	0.7208	0.598202	0.599644	0.604817
2016-07-17 17:00:00	1.36729	1.34763	1.3723	1.29105	1.35088	1.36122
2016-07-17 18:00:00	3.91862	3.93171	3.82147	3.97539	3.93903	3.93352
2016-07-17 19:00:00	8.83724	8.52251	8.06881	8.77204	8.77807	8.83051
2016-07-17 20:00:00	8.19284	8.01829	7.6484	7.88231	8.17134	8.178
2016-07-17 21:00:00	8.01463	7.73474	7.41792	8.08281	8.00686	8.02114
2016-07-17 22:00:00	5.60918	5.58845	5.51793	5.67181	5.654	5.62434
2016-07-17 23:00:00	1.91211	1.90923	1.86684	1.96311	1.90095	1.90705
2016-07-18	0.626249	0.675523	0.716809	0.626841	0.619423	0.619052
2016-07-18 01:00:00	0.987139	0.983614	1.05215	1.03086	0.976219	0.979942
2016-07-18 02:00:00	2.75903	2.73671	2.66974	2.76365	2.75301	2.75852
2016-07-18 03:00:00	1.71666	1.69836	1.65346	1.70283	1.70131	1.71024
2016-07-18 04:00:00	0.919196	0.93223	0.988704	0.896668	0.905764	0.910888
2016-07-18 05:00:00	0.949358	0.972952	1.03666	0.934551	0.935988	0.941637
2016-07-18 06:00:00	0.898019	0.90901	0.958967	0.872616	0.883375	0.889778
2016-07-18 07:00:00	0.948457	0.959656	1.03677	0.924661	0.932933	0.940224
2016-07-18 08:00:00	0.467322	0.511084	0.628399	0.473886	0.458939	0.459578
2016-07-18 09:00:00	0.476924	0.519452	0.669813	0.480745	0.468084	0.468976
2016-07-18 10:00:00	1.49527	1.49178	1.4782	1.48557	1.47793	1.48811
2016-07-18 11:00:00	1.15308	1.18416	1.15594	1.15479	1.13677	1.14508
2016-07-18 12:00:00	1.92542	1.91959	1.88508	1.94104	1.90949	1.91972
2016-07-18 13:00:00	0.976723	1.03218	1.05491	0.974305	0.961289	0.968115
2016-07-18 14:00:00	0.64323	0.724607	0.778394	0.635046	0.632008	0.635977
2016-07-18 15:00:00	0.0875083	0.147311	0.353039	0.106981	0.0851693	0.0803694
2016-07-18 16:00:00	0.485688	0.574699	0.693744	0.49405	0.476532	0.478119
2016-07-18 17:00:00	1.03784	1.08822	1.13403	1.05142	1.02554	1.03062
2016-07-18 18:00:00	1.72042	1.71862	1.65257	1.74136	1.7084	1.71639
2016-07-18 19:00:00	3.94013	3.94988	4.03527	4.00278	3.95441	3.94621
2016-07-18 20:00:00	3.08681	3.01686	2.94775	3.15982	3.08799	3.08893
2016-07-18 21:00:00	2.83458	2.81365	2.79902	2.87634	2.83133	2.83394
2016-07-18 22:00:00	2.53262	2.5239	2.51286	2.61061	2.52685	2.53038
2016-07-18 23:00:00	3.61548	3.64136	3.52729	3.65948	3.62919	3.61963
2016-07-19	3.3845	3.35339	3.20995	3.41629	3.38587	3.3891
2016-07-19 01:00:00	2.78112	2.73373	2.69223	2.8118	2.77579	2.78252
2016-07-19 02:00:00	1.84407	1.81171	1.80759	1.87441	1.83048	1.83954
2016-07-19 03:00:00	1.63295	1.6356	1.51114	1.70403	1.62251	1.62945
2016-07-19 04:00:00	1.21177	1.25375	1.24672	1.25485	1.20122	1.20488
2016-07-19 05:00:00	0.486356	0.518896	0.636332	0.488225	0.478501	0.479129
2016-07-19 06:00:00	0.373996	0.398173	0.579334	0.38325	0.367277	0.366663
2016-07-19 07:00:00	0.531734	0.567384	0.667607	0.534397	0.522414	0.524564
2016-07-19 08:00:00	0.369656	0.388348	0.580474	0.375866	0.362036	0.362109
2016-07-19 09:00:00	0.428758	0.450281	0.60551	0.42965	0.420008	0.421265
2016-07-19 10:00:00	0.352453	0.367839	0.570809	0.359147	0.344167	0.344878
2016-07-19 11:00:00	1.13812	1.19096	1.21655	1.16427	1.12282	1.13153
2016-07-19 12:00:00	0.875846	0.921206	0.986836	0.891026	0.860795	0.867895
2016-07-19 13:00:00	0.669914	0.663119	0.841024	0.717965	0.657628	0.661628
2016-07-19 14:00:00	0.557857	0.590067	0.737728	0.591037	0.547032	0.549578
2016-07-19 15:00:00	0.262289	0.310873	0.493163	0.28043	0.256117	0.254735
2016-07-19 16:00:00	0.251273	0.307665	0.477321	0.266697	0.245264	0.244425
2016-07-19 17:00:00	0.144941	0.193498	0.399573	0.162641	0.141175	0.138186
2016-07-19 18:00:00	0.190059	0.236287	0.425005	0.210343	0.184856	0.183387
2016-07-19 19:00:00	0.193691	0.226396	0.451536	0.219255	0.188021	0.186703
2016-07-19 20:00:00	0.36231	0.388167	0.542994	0.384758	0.352917	0.355195
2016-07-19 21:00:00	0.25197	0.266237	0.488844	0.278569	0.244163	0.244575
2016-07-19 22:00:00	0.438469	0.459378	0.593289	0.460889	0.426933	0.430984
2016-07-19 23:00:00	0.348932	0.367918	0.566498	0.391241	0.338529	0.341257
2016-07-20	0.608222	0.655625	0.742497	0.605225	0.601715	0.601791
2016-07-20 01:00:00	0.564503	0.593535	0.698096	0.55963	0.557153	0.55735
2016-07-20 02:00:00	0.666923	0.696045	0.767185	0.660201	0.657555	0.658913
2016-07-20 03:00:00	0.679351	0.706965	0.794106	0.692902	0.669957	0.671008
2016-07-20 04:00:00	0.621744	0.661139	0.736567	0.631014	0.61258	0.61429
2016-07-20 05:00:00	0.485444	0.523659	0.63731	0.496427	0.477587	0.478732
2016-07-20 06:00:00	0.397562	0.426086	0.591945	0.401807	0.390588	0.390351
2016-07-20 07:00:00	0.423541	0.459339	0.602586	0.427245	0.415448	0.416547
2016-07-20 08:00:00	0.417631	0.461972	0.602831	0.419099	0.409417	0.410464
2016-07-20 09:00:00	0.31174	0.355972	0.553138	0.323873	0.304404	0.304347
2016-07-20 10:00:00	0.391183	0.448023	0.589092	0.397496	0.382479	0.38395
2016-07-20 11:00:00	0.867218	0.963272	0.978328	0.887404	0.853396	0.860366
2016-07-20 12:00:00	0.770481	0.861808	0.917228	0.791909	0.757185	0.762774
2016-07-20 13:00:00	0.625637	0.661544	0.799473	0.671433	0.613881	0.617465
2016-07-20 14:00:00	0.143658	0.239896	0.406681	0.169727	0.140884	0.137083
2016-07-20 15:00:00	0.133756	0.223103	0.400584	0.157805	0.130871	0.127207
2016-07-20 16:00:00	0.415404	0.462358	0.680988	0.475927	0.406754	0.407194
2016-07-20 17:00:00	0.345214	0.399945	0.650708	0.406356	0.337901	0.336706
2016-07-20 18:00:00	0.133756	0.204127	0.404975	0.165517	0.130498	0.127217
2016-07-20 19:00:00	0.197595	0.241537	0.461184	0.220686	0.192931	0.190888
2016-07-20 20:00:00	0.324989	0.368635	0.539641	0.354961	0.317874	0.317584
2016-07-20 21:00:00	0.682378	0.670425	0.836654	0.730606	0.669613	0.673897
2016-07-20 22:00:00	0.633401	0.681517	0.780203	0.667187	0.621312	0.625713
2016-07-20 23:00:00	0.987426	1.01072	1.12058	1.03417	0.971765	0.978503
2016-07-21	1.05158	1.10347	1.13182	1.06559	1.04038	1.04471
2016-07-21 01:00:00	1.57463	1.56931	1.47509	1.5792	1.56318	1.57017
2016-07-21 02:00:00	1.17601	1.22244	1.23012	1.22929	1.16638	1.16868
2016-07-21 03:00:00	1.25772	1.31326	1.3397	1.30267	1.24772	1.25104
2016-07-21 04:00:00	0.589514	0.617813	0.705558	0.608967	0.580324	0.582277
2016-07-21 05:00:00	0.685693	0.735729	0.8212	0.705031	0.67602	0.678779
2016-07-21 06:00:00	0.567498	0.60651	0.692313	0.584274	0.558197	0.560138
2016-07-21 07:00:00	0.631289	0.680071	0.755009	0.646116	0.620797	0.624133
2016-07-21 08:00:00	0.553978	0.602001	0.689025	0.570057	0.543825	0.546497
2016-07-21 09:00:00	0.538878	0.589566	0.677239	0.55578	0.528185	0.531328
2016-07-21 10:00:00	0.619836	0.684352	0.738328	0.638494	0.607959	0.612629
2016-07-21 11:00:00	1.3861	1.48591	1.44714	1.43819	1.3703	1.38004
2016-07-21 12:00:00	0.869034	0.955296	1.00318	0.895504	0.855246	0.861956
2016-07-21 13:00:00	0.240747	0.314763	0.486862	0.258336	0.234797	0.233985
2016-07-21 14:00:00	0.145574	0.241952	0.416015	0.169787	0.142935	0.139391
2016-07-21 15:00:00	0.0989269	0.159812	0.366663	0.116664	0.0959535	0.0923414
2016-07-21 16:00:00	0.108061	0.184053	0.3889	0.139151	0.106356	0.102027
2016-07-21 17:00:00	0.0990447	0.128978	0.365823	0.120312	0.0962349	0.0920832
2016-07-21 18:00:00	0.143913	0.192198	0.402232	0.175341	0.140926	0.137498
2016-07-21 19:00:00	0.0753	0.108043	0.373951	0.116327	0.0729925	0.0687161
2016-07-21 20:00:00	0.318799	0.36141	0.515817	0.343545	0.311501	0.312069
2016-07-21 21:00:00	0.35861	0.384021	0.53858	0.378633	0.349103	0.350948
2016-07-21 22:00:00	0.653137	0.69679	0.773043	0.675033	0.63882	0.645453
2016-07-21 23:00:00	0.605639	0.645975	0.748312	0.622302	0.590264	0.596875
2016-07-22	0.856225	0.878518	0.980367	0.884711	0.845323	0.847604
2016-07-22 01:00:00	0.67481	0.744984	0.82343	0.705793	0.666508	0.666488
2016-07-22 02:00:00	0.955629	1.00301	1.04967	0.967106	0.941998	0.947607
2016-07-22 03:00:00	0.841095	0.891227	0.956599	0.838982	0.827849	0.833123
2016-07-22 04:00:00	0.417361	0.463025	0.595242	0.412088	0.409609	0.409155
2016-07-22 05:00:00	0.54699	0.612977	0.673587	0.568811	0.537982	0.539782
2016-07-22 06:00:00	0.459725	0.498634	0.617667	0.479146	0.45201	0.452523
2016-07-22 07:00:00	0.435614	0.480646	0.602949	0.461755	0.427444	0.428452
2016-07-22 08:00:00	0.515719	0.565394	0.654229	0.53155	0.506578	0.508223
2016-07-22 09:00:00	0.472681	0.533946	0.63203	0.489894	0.4635	0.465633
2016-07-22 10:00:00	0.413472	0.47014	0.603518	0.435638	0.404661	0.406261
2016-07-22 11:00:00	0.990966	1.07247	1.08798	1.03101	0.977521	0.984039
2016-07-22 12:00:00	0.868171	0.950672	0.996024	0.899847	0.855666	0.861325
2016-07-22 13:00:00	0.368419	0.429453	0.56348	0.386855	0.361298	0.361283
2016-07-22 14:00:00	0.804599	0.878466	0.928439	0.860982	0.794577	0.796708
2016-07-22 15:00:00	0.604105	0.65914	0.769014	0.629819	0.594898	0.595915
2016-07-22 16:00:00	0.360743	0.36718	0.537885	0.331938	0.354867	0.353897
2016-07-22 17:00:00	0.19924	0.231239	0.44748	0.234701	0.195022	0.192886
2016-07-22 18:00:00	0.193496	0.215742	0.455236	0.235655	0.188799	0.18669
2016-07-22 19:00:00	0.205716	0.229097	0.469673	0.254823	0.200244	0.199276
2016-07-22 20:00:00	0.302717	0.331397	0.526399	0.348718	0.295622	0.295549
2016-07-22 21:00:00	0.379513	0.401322	0.553717	0.416304	0.369508	0.372309
2016-07-22 22:00:00	0.393965	0.404773	0.572516	0.427095	0.383051	0.386057
2016-07-22 23:00:00	0.571982	0.619801	0.700576	0.621076	0.559913	0.564652
2016-07-23	0.355458	0.391218	0.570099	0.383225	0.352913	0.348795
2016-07-23 01:00:00	0.574538	0.634496	0.694312	0.588589	0.568681	0.568023
2016-07-23 02:00:00	0.515676	0.570537	0.654149	0.527175	0.509673	0.509112
2016-07-23 03:00:00	0.378023	0.419319	0.581582	0.393894	0.373425	0.371214
2016-07-23 04:00:00	0.589242	0.653406	0.716461	0.593433	0.581363	0.582635
2016-07-23 05:00:00	0.652811	0.718624	0.775806	0.665569	0.643349	0.645328
2016-07-23 06:00:00	0.503649	0.570402	0.651509	0.50762	0.495659	0.496828
2016-07-23 07:00:00	0.484275	0.556478	0.639835	0.492267	0.475807	0.477753
2016-07-23 08:00:00	0.425401	0.49361	0.60896	0.431513	0.417291	0.418384
2016-07-23 09:00:00	0.433039	0.505272	0.610585	0.443593	0.424215	0.426125
2016-07-23 10:00:00	0.460754	0.53603	0.627755	0.474067	0.451242	0.454014
2016-07-23 11:00:00	0.390485	0.453434	0.592796	0.403238	0.381712	0.383428
2016-07-23 12:00:00	0.449513	0.509061	0.611236	0.462542	0.439418	0.442354
2016-07-23 13:00:00	0.193669	0.248289	0.451059	0.205792	0.188559	0.186427
2016-07-23 14:00:00	0.127308	0.190773	0.406882	0.139755	0.12414	0.120022
2016-07-23 15:00:00	0.0503828	0.0936784	0.350515	0.0598335	0.0488565	0.0435874
2016-07-23 16:00:00	0.0758764	0.102301	0.364779	0.0926498	0.0738302	0.0690283
2016-07-23 17:00:00	0.0499122	0.0841523	0.359882	0.0904953	0.0485322	0.043711
2016-07-23 18:00:00	0.150788	0.185116	0.423201	0.188339	0.147081	0.14402
2016-07-23 19:00:00	0.154413	0.191775	0.42771	0.20601	0.150461	0.147912
2016-07-23 20:00:00	0.258879	0.281805	0.494293	0.322675	0.251493	0.251898
2016-07-23 21:00:00	0.396788	0.422039	0.567814	0.455162	0.385808	0.389486
2016-07-23 22:00:00	0.374495	0.405009	0.544215	0.425195	0.36377	0.366899
2016-07-23 23:00:00	0.519736	0.577997	0.653425	0.568338	0.505773	0.511811
2016-07-24	0.409511	0.470201	0.596953	0.437301	0.405745	0.402636
2016-07-24 01:00:00	0.470652	0.540159	0.636168	0.494499	0.465176	0.463687
2016-07-24 02:00:00	0.442302	0.505841	0.615822	0.481861	0.435719	0.43526
2016-07-24 03:00:00	0.512471	0.577509	0.656889	0.542433	0.504807	0.505275
2016-07-24 04:00:00	0.36644	0.407812	0.576992	0.401117	0.360243	0.358984
2016-07-24 05:00:00	0.545524	0.600695	0.675134	0.573481	0.536494	0.538335
2016-07-24 06:00:00	0.392172	0.419172	0.587007	0.433236	0.385105	0.384963
2016-07-24 07:00:00	0.482949	0.519627	0.637619	0.51121	0.474384	0.475573
2016-07-24 08:00:00	0.42907	0.466821	0.603548	0.4596	0.420874	0.421949
2016-07-24 09:00:00	0.492413	0.538832	0.641728	0.507132	0.483306	0.485328
2016-07-24 10:00:00	0.384347	0.418162	0.584878	0.406597	0.376132	0.377048
2016-07-24 11:00:00	0.468806	0.513787	0.62647	0.489562	0.458911	0.461626
2016-07-24 12:00:00	0.380475	0.418642	0.571383	0.403359	0.371264	0.372919
2016-07-24 13:00:00	0.215878	0.255493	0.458544	0.248581	0.211138	0.208873
2016-07-24 14:00:00	0.151179	0.20325	0.409936	0.184525	0.148099	0.144582
2016-07-24 15:00:00	0.0960125	0.142857	0.375632	0.126346	0.0939557	0.0892004
2016-07-24 16:00:00	0.11984	0.178476	0.392918	0.159287	0.117331	0.113458
2016-07-24 17:00:00	0.0490617	0.0876543	0.3447	0.085341	0.0471863	0.0423133
2016-07-24 18:00:00	0.162557	0.213132	0.422534	0.205607	0.158478	0.155761
2016-07-24 19:00:00	0.100093	0.120874	0.380338	0.164126	0.0970509	0.093463
2016-07-24 20:00:00	0.309122	0.346839	0.525088	0.35655	0.301902	0.302059
2016-07-24 21:00:00	0.303359	0.334264	0.514706	0.353233	0.294893	0.29616
2016-07-24 22:00:00	0.452083	0.494503	0.602841	0.495785	0.441041	0.444616
2016-07-24 23:00:00	0.441227	0.483416	0.608765	0.490713	0.429741	0.433679
2016-07-25	0.448924	0.497808	0.617124	0.472131	0.445351	0.442372
2016-07-25 01:00:00	0.462357	0.512705	0.621402	0.483294	0.457611	0.455809
2016-07-25 02:00:00	0.48304	0.541605	0.631678	0.498694	0.477501	0.476591
2016-07-25 03:00:00	0.907159	0.936674	0.978144	0.888839	0.894553	0.899822
2016-07-25 04:00:00	6.32537	6.32509	6.24214	6.1455	6.34625	6.33686
2016-07-25 05:00:00	2.57848	2.55976	2.64519	2.59278	2.56979	2.5763
2016-07-25 06:00:00	2.13561	2.11891	2.15055	2.15437	2.11925	2.13099
2016-07-25 07:00:00	1.32874	1.3054	1.35938	1.3106	1.30968	1.32058
2016-07-25 08:00:00	0.950089	0.950697	1.03167	0.941163	0.934376	0.942179
2016-07-25 09:00:00	0.856846	0.863653	0.908274	0.861536	0.841175	0.849107
2016-07-25 10:00:00	1.30217	1.28699	1.34425	1.2918	1.28397	1.29451
2016-07-25 11:00:00	1.18219	1.15168	1.16298	1.16782	1.1624	1.17332
2016-07-25 12:00:00	1.71145	1.70059	1.70642	1.71781	1.69287	1.70537
2016-07-25 13:00:00	2.80835	2.80069	2.64422	2.87796	2.80194	2.80818
2016-07-25 14:00:00	3.90268	3.86109	3.88178	4.01593	3.91427	3.90989
2016-07-25 15:00:00	2.59377	2.53919	2.58735	2.65814	2.58358	2.59211
2016-07-25 16:00:00	4.00439	3.98295	4.06709	4.09707	4.018	4.01192
2016-07-25 17:00:00	4.85345	4.89654	4.85937	4.94519	4.87922	4.8649
2016-07-25 18:00:00	3.35314	3.35709	3.34435	3.44637	3.35478	3.35579
2016-07-25 19:00:00	3.91159	3.95575	3.72249	3.99207	3.92651	3.9186
2016-07-25 20:00:00	7.37186	7.33361	6.9197	7.03385	7.38543	7.37504
2016-07-25 21:00:00	5.99805	6.09696	6.02896	5.75389	6.03058	6.0119
2016-07-25 22:00:00	5.03161	5.18237	4.91629	5.0337	5.06736	5.05607
2016-07-25 23:00:00	4.06238	4.1946	3.93227	4.04773	4.08502	4.07828
2016-07-26	3.13646	3.14555	3.00102	3.1836	3.1328	3.13872
2016-07-26 01:00:00	2.03719	2.02882	2.00976	2.06334	2.02515	2.03261
2016-07-26 02:00:00	2.03966	2.01995	1.96764	2.16188	2.02963	2.03477
2016-07-26 03:00:00	4.24025	4.21784	4.18576	4.2443	4.25795	4.25036
2016-07-26 04:00:00	1.66545	1.6653	1.62949	1.66221	1.65074	1.65967
2016-07-26 05:00:00	1.75307	1.7346	1.70167	1.74538	1.73511	1.74686
2016-07-26 06:00:00	1.21824	1.22936	1.27621	1.20374	1.20287	1.2108
2016-07-26 07:00:00	0.617701	0.652015	0.704525	0.610172	0.606125	0.609564
2016-07-26 08:00:00	0.910142	0.932867	0.993947	0.891686	0.895606	0.902313
2016-07-26 09:00:00	0.721641	0.803246	0.8581	0.732532	0.710681	0.714847
2016-07-26 10:00:00	1.19117	1.23758	1.21311	1.22325	1.17643	1.18518
2016-07-26 11:00:00	0.872454	0.914982	0.94679	0.896143	0.858275	0.865203
2016-07-26 12:00:00	1.10301	1.15607	1.20861	1.12016	1.08805	1.09626
2016-07-26 13:00:00	0.646373	0.651834	0.730555	0.639974	0.63427	0.638162
2016-07-26 14:00:00	0.939763	0.942506	1.02585	0.929334	0.928827	0.929883
2016-07-26 15:00:00	1.20676	1.21575	1.26641	1.21522	1.19618	1.19965
2016-07-26 16:00:00	1.31667	1.26897	1.30329	1.30657	1.30037	1.30864
2016-07-26 17:00:00	1.4326	1.40171	1.44638	1.45593	1.41804	1.42616
2016-07-26 18:00:00	2.17433	2.09832	2.25871	2.25444	2.16754	2.1702
2016-07-26 19:00:00	4.91823	4.88323	4.85624	5.07331	4.95916	4.9304
2016-07-26 20:00:00	5.90592	5.90832	5.92425	5.94869	5.95637	5.9198
2016-07-26 21:00:00	6.72131	6.69111	6.59357	6.61753	6.769	6.73203
2016-07-26 22:00:00	6.37824	6.31299	6.23479	6.35845	6.43082	6.3957
2016-07-26 23:00:00	3.92655	3.92088	3.68697	4.01407	3.95247	3.93466
2016-07-27	2.04219	2.01445	1.98613	2.08567	2.03166	2.04051
2016-07-27 01:00:00	2.61068	2.55473	2.58808	2.67886	2.60761	2.61212
2016-07-27 02:00:00	4.40107	4.32819	4.1383	4.41524	4.42129	4.41621
2016-07-27 03:00:00	3.64265	3.64608	3.64224	3.68608	3.65048	3.64905
2016-07-27 04:00:00	1.81305	1.82311	1.76527	1.81235	1.79703	1.80744
2016-07-27 05:00:00	1.02773	1.06817	1.1235	1.00277	1.01278	1.02026
2016-07-27 06:00:00	0.882267	0.916831	0.958509	0.857562	0.867374	0.874215
2016-07-27 07:00:00	1.05486	1.10161	1.16243	1.03959	1.03955	1.04797
2016-07-27 08:00:00	0.947528	0.97291	1.04669	0.930896	0.93182	0.939973
2016-07-27 09:00:00	0.52996	0.570094	0.656258	0.524949	0.519921	0.522559
2016-07-27 10:00:00	1.26081	1.2444	1.29453	1.23564	1.24281	1.25275
2016-07-27 11:00:00	0.979631	1.0439	1.04571	1.00267	0.966371	0.973197
2016-07-27 12:00:00	0.965347	1.00699	1.07592	0.974936	0.951123	0.958325
2016-07-27 13:00:00	0.641269	0.645692	0.736951	0.625064	0.629626	0.633108
2016-07-27 14:00:00	0.161129	0.199537	0.439251	0.185403	0.158746	0.154431
2016-07-27 15:00:00	0.35193	0.373006	0.520862	0.358066	0.345087	0.345409
2016-07-27 16:00:00	0.18796	0.196194	0.430654	0.210674	0.183761	0.181409
2016-07-27 17:00:00	0.111174	0.13029	0.398156	0.151721	0.108869	0.105142
2016-07-27 18:00:00	0.222334	0.240064	0.471883	0.256393	0.21697	0.215718
2016-07-27 19:00:00	1.95277	1.90566	1.97092	1.9689	1.93829	1.94723
2016-07-27 20:00:00	4.51247	4.545	4.45913	4.56921	4.5422	4.52239
2016-07-27 21:00:00	4.98537	5.059	4.92483	4.99556	5.02202	4.99655
2016-07-27 22:00:00	4.671	4.70723	4.59825	4.7168	4.70744	4.68249
2016-07-27 23:00:00	3.12167	3.13691	3.10271	3.17217	3.12706	3.12237
2016-07-28	3.28414	3.26097	3.11354	3.36881	3.28849	3.28918
2016-07-28 01:00:00	1.18977	1.23543	1.2499	1.21418	1.17769	1.18269
2016-07-28 02:00:00	5.62649	5.63906	5.52709	5.5699	5.65059	5.64151
2016-07-28 03:00:00	0.535869	0.613124	0.67194	0.537112	0.528932	0.528892
2016-07-28 04:00:00	1.38313	1.4119	1.40739	1.37913	1.36677	1.37675
2016-07-28 05:00:00	0.963472	1.01732	1.07158	0.94986	0.949619	0.956209
2016-07-28 06:00:00	0.849498	0.892317	0.928512	0.83583	0.835405	0.842039
2016-07-28 07:00:00	0.510693	0.582359	0.66018	0.514001	0.502145	0.503872
2016-07-28 08:00:00	0.815909	0.837376	0.87721	0.796515	0.801712	0.807965
2016-07-28 09:00:00	0.441749	0.484586	0.613485	0.451914	0.433485	0.434719
2016-07-28 10:00:00	0.565743	0.611985	0.696319	0.577324	0.55564	0.558932
2016-07-28 11:00:00	1.05957	1.1213	1.15847	1.09802	1.04618	1.05267
2016-07-28 12:00:00	0.728818	0.787998	0.874677	0.747005	0.717547	0.721602
2016-07-28 13:00:00	0.345324	0.385777	0.553274	0.366856	0.339351	0.338251
2016-07-28 14:00:00	0.497436	0.540011	0.647804	0.539763	0.488708	0.488996
2016-07-28 15:00:00	0.270518	0.308622	0.508021	0.302092	0.265561	0.263308
2016-07-28 16:00:00	0.450175	0.48856	0.659793	0.483969	0.441778	0.443023
2016-07-28 17:00:00	1.49332	1.50128	1.42308	1.49884	1.48284	1.48751
2016-07-28 18:00:00	2.11627	2.07576	1.90758	2.116	2.10939	2.11363
2016-07-28 19:00:00	6.07279	6.0977	5.72939	6.08558	6.11718	6.09357
2016-07-28 20:00:00	7.92254	7.75498	7.60441	7.69917	7.92561	7.91532
2016-07-28 21:00:00	4.29025	4.33698	4.31103	4.33673	4.31693	4.29772
2016-07-28 22:00:00	2.76904	2.78047	2.6907	2.85508	2.76858	2.76888
2016-07-28 23:00:00	2.31584	2.32024	2.4731	2.37002	2.30636	2.31245
2016-07-29	2.50893	2.45026	2.46637	2.59017	2.50168	2.50925
2016-07-29 01:00:00	2.32468	2.2832	2.34935	2.38742	2.31545	2.32416
2016-07-29 02:00:00	1.945	1.95588	2.13762	1.97707	1.93149	1.94054
2016-07-29 03:00:00	3.02553	3.04864	3.04695	3.10995	3.02461	3.02875
2016-07-29 04:00:00	3.36609	3.37251	3.29827	3.42615	3.36806	3.37041
