# Supplementary material for: Deep learning-based novel ensemble method with best score transferred-adaptive neuro fuzzy inference system for energy consumption prediction
Source: PeerJ journal article supplement (doi:10.7717/peerj-cs.2680), 2025-02-21
Supplement: Tdsdlmdatabase.zip [file Tdsdlmdatabase.zip]

## Sheet: PredTrainV2
time	House overall	LSTM	CNN	RNN	GRU	Bi-LSTM
2016-01-01 05:00:00	1.04413	1.03805	1.01324	1.02585	1.01918	1.05869
2016-01-01 06:00:00	0.918167	0.904739	0.941552	0.931659	0.892818	0.933091
2016-01-01 07:00:00	0.714736	0.702457	0.766155	0.739824	0.689286	0.729535
2016-01-01 08:00:00	0.960013	0.943759	0.984787	0.971582	0.933991	0.974322
2016-01-01 09:00:00	0.639836	0.631441	0.694552	0.663966	0.614473	0.654736
2016-01-01 10:00:00	1.21942	1.22377	1.21374	1.24399	1.19318	1.23361
2016-01-01 11:00:00	0.798747	0.789005	0.835825	0.822356	0.772707	0.813273
2016-01-01 12:00:00	0.537055	0.530409	0.617606	0.564294	0.51182	0.552254
2016-01-01 13:00:00	0.358377	0.36527	0.513813	0.392377	0.334327	0.374284
2016-01-01 14:00:00	0.75672	0.730031	0.824177	0.750836	0.731434	0.771259
2016-01-01 15:00:00	1.47058	1.40847	1.50201	1.42896	1.44591	1.4849
2016-01-01 16:00:00	1.32164	1.29919	1.31262	1.30646	1.29764	1.33571
2016-01-01 17:00:00	1.91669	1.87639	1.90632	1.88522	1.89517	1.9321
2016-01-01 18:00:00	2.09539	2.04602	1.95851	2.04203	2.07473	2.11177
2016-01-01 19:00:00	1.30432	1.26668	1.23662	1.28131	1.27944	1.31999
2016-01-01 20:00:00	1.27128	1.23714	1.21809	1.24776	1.2456	1.28654
2016-01-01 21:00:00	1.48499	1.48428	1.50781	1.48022	1.46238	1.4993
2016-01-01 22:00:00	1.92876	1.95251	1.86559	1.92208	1.91061	1.94411
2016-01-01 23:00:00	2.03032	2.02096	2.05817	2.01166	2.01174	2.04555
2016-01-02	2.75844	2.78595	2.74112	2.69105	2.74119	2.77776
2016-01-02 01:00:00	1.4312	1.4409	1.38894	1.38834	1.40886	1.446
2016-01-02 02:00:00	0.945283	0.950625	0.919909	0.935319	0.920287	0.961256
2016-01-02 03:00:00	0.774271	0.7918	0.848279	0.768867	0.748973	0.789728
2016-01-02 04:00:00	1.48901	1.49372	1.431	1.44883	1.46514	1.50475
2016-01-02 05:00:00	1.3494	1.34935	1.28558	1.32086	1.32546	1.36581
2016-01-02 06:00:00	0.769654	0.764923	0.805663	0.742874	0.744268	0.784628
2016-01-02 07:00:00	0.784055	0.776344	0.826733	0.818462	0.758755	0.798763
2016-01-02 08:00:00	0.994467	0.996678	1.03562	1.01448	0.968189	1.00859
2016-01-02 09:00:00	0.778566	0.767592	0.823488	0.806117	0.753042	0.793238
2016-01-02 10:00:00	0.814647	0.809525	0.85017	0.836607	0.788376	0.828992
2016-01-02 11:00:00	0.922265	0.911302	0.935957	0.943598	0.896362	0.936639
2016-01-02 12:00:00	1.61104	1.61746	1.52089	1.60687	1.58793	1.62598
2016-01-02 13:00:00	1.39428	1.40457	1.40108	1.39491	1.37073	1.40913
2016-01-02 14:00:00	0.72421	0.719386	0.784598	0.744913	0.698199	0.738736
2016-01-02 15:00:00	0.731881	0.724233	0.800866	0.757615	0.706741	0.746525
2016-01-02 16:00:00	0.28691	0.300351	0.440464	0.3338	0.264296	0.303156
2016-01-02 17:00:00	0.260415	0.278143	0.437457	0.30665	0.238421	0.27679
2016-01-02 18:00:00	0.630465	0.630659	0.700389	0.655493	0.606289	0.645334
2016-01-02 19:00:00	1.6248	1.63904	1.52877	1.61776	1.60273	1.63927
2016-01-02 20:00:00	1.76722	1.79559	1.75401	1.76552	1.74607	1.78211
2016-01-02 21:00:00	2.15725	2.20062	2.05976	2.14626	2.13959	2.17329
2016-01-02 22:00:00	2.92425	2.96523	2.86544	2.87079	2.90996	2.94397
2016-01-02 23:00:00	2.93471	2.90578	2.90537	2.85676	2.91786	2.95452
2016-01-03	1.738	1.6995	1.75295	1.70559	1.71515	1.75321
2016-01-03 01:00:00	2.07386	2.03575	1.9966	2.02645	2.05647	2.09187
2016-01-03 02:00:00	1.6121	1.61553	1.55082	1.57523	1.59038	1.62924
2016-01-03 03:00:00	0.798349	0.815495	0.851436	0.796479	0.773168	0.814056
2016-01-03 04:00:00	0.997916	0.996844	0.982919	0.999431	0.973431	1.01224
2016-01-03 05:00:00	0.713656	0.711467	0.790128	0.744118	0.688293	0.728453
2016-01-03 06:00:00	0.869194	0.86607	0.900882	0.893552	0.843985	0.884118
2016-01-03 07:00:00	0.904869	0.903904	0.929336	0.923258	0.8791	0.919727
2016-01-03 08:00:00	0.790551	0.782879	0.829119	0.823803	0.764637	0.805248
2016-01-03 09:00:00	0.793403	0.791899	0.834179	0.825243	0.766699	0.807844
2016-01-03 10:00:00	0.817984	0.809904	0.850313	0.850735	0.791699	0.832572
2016-01-03 11:00:00	0.877742	0.872448	0.909286	0.904783	0.851109	0.892059
2016-01-03 12:00:00	1.24504	1.23156	1.26169	1.26136	1.21999	1.25925
2016-01-03 13:00:00	0.738852	0.730139	0.796224	0.769371	0.712817	0.753506
2016-01-03 14:00:00	0.686422	0.68312	0.780948	0.718174	0.660753	0.701099
2016-01-03 15:00:00	0.715184	0.705947	0.761006	0.739565	0.69076	0.729958
2016-01-03 16:00:00	1.23359	1.22743	1.23043	1.17695	1.21006	1.24985
2016-01-03 17:00:00	1.14159	1.12655	1.0793	1.1251	1.11711	1.15721
2016-01-03 18:00:00	0.78357	0.787651	0.8435	0.803721	0.758407	0.797999
2016-01-03 19:00:00	0.776253	0.777447	0.811406	0.789728	0.75076	0.790759
2016-01-03 20:00:00	1.37164	1.38917	1.38032	1.38718	1.34849	1.38633
2016-01-03 21:00:00	1.88624	1.92888	1.83059	1.87449	1.86656	1.90157
2016-01-03 22:00:00	2.0527	2.09388	1.88354	2.00695	2.03405	2.07102
2016-01-03 23:00:00	1.90011	1.95455	1.8384	1.84144	1.87852	1.91975
2016-01-04	1.6276	1.6583	1.61181	1.60167	1.60669	1.64268
2016-01-04 01:00:00	1.53868	1.56322	1.56478	1.49889	1.51661	1.55346
2016-01-04 02:00:00	1.09611	1.10521	1.00943	1.08017	1.07056	1.11246
2016-01-04 03:00:00	0.700465	0.722927	0.822368	0.706155	0.674788	0.716187
2016-01-04 04:00:00	0.925734	0.931665	0.940426	0.937301	0.900674	0.940121
2016-01-04 05:00:00	0.559207	0.566016	0.650662	0.600472	0.534092	0.574365
2016-01-04 06:00:00	0.752742	0.748493	0.805949	0.788791	0.727063	0.767539
2016-01-04 07:00:00	0.669524	0.667541	0.747057	0.707266	0.643488	0.684365
2016-01-04 08:00:00	0.925768	0.920829	0.946985	0.956681	0.899318	0.940183
2016-01-04 09:00:00	0.797567	0.786431	0.840248	0.829335	0.771266	0.812151
2016-01-04 10:00:00	1.21521	1.21943	1.19381	1.23896	1.18844	1.22954
2016-01-04 11:00:00	1.02252	1.02321	1.06802	1.04953	0.99611	1.03732
2016-01-04 12:00:00	0.674694	0.672728	0.746032	0.715069	0.647673	0.689538
2016-01-04 13:00:00	0.569048	0.55864	0.649335	0.609569	0.543325	0.584248
2016-01-04 14:00:00	1.12017	1.08696	1.18164	1.11386	1.09363	1.13423
2016-01-04 15:00:00	1.61223	1.58006	1.72811	1.55607	1.5906	1.62892
2016-01-04 16:00:00	1.09534	1.09105	1.06818	1.04838	1.06975	1.11113
2016-01-04 17:00:00	0.983486	0.973625	1.04404	0.947797	0.95836	0.998471
2016-01-04 18:00:00	0.623871	0.634571	0.659717	0.645651	0.598098	0.638638
2016-01-04 19:00:00	0.475175	0.494083	0.523966	0.50719	0.449047	0.49037
2016-01-04 20:00:00	0.639476	0.650293	0.693494	0.663839	0.612836	0.654117
2016-01-04 21:00:00	1.22737	1.23334	1.18013	1.23822	1.20074	1.24121
2016-01-04 22:00:00	2.06341	2.03192	1.95917	2.01085	2.04034	2.07922
2016-01-04 23:00:00	2.09603	2.04976	2.0172	2.03406	2.07546	2.11226
2016-01-05	1.31559	1.31318	1.30569	1.31953	1.29066	1.33006
2016-01-05 01:00:00	1.92733	1.92107	1.7962	1.87547	1.90649	1.94405
2016-01-05 02:00:00	2.36018	2.37841	2.16387	2.24736	2.34121	2.38161
2016-01-05 03:00:00	2.38923	2.36524	2.32576	2.31954	2.3682	2.40799
2016-01-05 04:00:00	1.70383	1.69977	1.75065	1.64399	1.67975	1.72126
2016-01-05 05:00:00	1.45336	1.43964	1.39229	1.41106	1.42668	1.46996
2016-01-05 06:00:00	1.33032	1.31198	1.30322	1.30167	1.3035	1.34683
2016-01-05 07:00:00	1.0311	1.0162	1.07445	1.06867	1.00294	1.04555
2016-01-05 08:00:00	0.991052	0.980004	1.02634	1.03408	0.962048	1.0053
2016-01-05 09:00:00	1.14128	1.12328	1.16729	1.17575	1.11274	1.15567
2016-01-05 10:00:00	1.36895	1.35914	1.32238	1.40206	1.33969	1.38318
2016-01-05 11:00:00	1.21453	1.19511	1.23101	1.24328	1.18605	1.22888
2016-01-05 12:00:00	1.29051	1.23716	1.2784	1.28444	1.2637	1.30466
2016-01-05 13:00:00	1.05745	1.01056	1.09358	1.06866	1.02859	1.07189
2016-01-05 14:00:00	0.625175	0.61747	0.6795	0.669787	0.597287	0.640064
2016-01-05 15:00:00	0.524366	0.525183	0.594391	0.573673	0.497498	0.539817
2016-01-05 16:00:00	0.503166	0.51273	0.582868	0.554208	0.476226	0.518565
2016-01-05 17:00:00	0.207993	0.229469	0.415414	0.270881	0.183961	0.22489
2016-01-05 18:00:00	0.261037	0.279147	0.443841	0.311602	0.236225	0.277466
2016-01-05 19:00:00	0.289017	0.303155	0.465405	0.339295	0.264464	0.305389
2016-01-05 20:00:00	0.384842	0.398329	0.537476	0.419537	0.358812	0.400741
2016-01-05 21:00:00	0.945684	0.946609	0.969072	0.958191	0.918466	0.96022
2016-01-05 22:00:00	1.27042	1.2727	1.2639	1.27193	1.24455	1.28423
2016-01-05 23:00:00	1.04641	1.05086	1.06611	1.05505	1.01898	1.06019
2016-01-06	1.19431	1.18879	1.17862	1.19146	1.16862	1.20879
2016-01-06 01:00:00	1.09085	1.08673	1.12182	1.09511	1.06457	1.10527
2016-01-06 02:00:00	0.943179	0.937369	0.891265	0.927849	0.91588	0.958914
2016-01-06 03:00:00	1.35283	1.35377	1.31474	1.32151	1.32696	1.36898
2016-01-06 04:00:00	1.04416	1.03004	1.05442	1.05024	1.01696	1.05852
2016-01-06 05:00:00	1.08066	1.07913	1.11993	1.10453	1.0528	1.09488
2016-01-06 06:00:00	0.950363	0.931236	0.985373	0.973311	0.922286	0.964784
2016-01-06 07:00:00	0.964373	0.94435	0.972682	0.985078	0.936611	0.978793
2016-01-06 08:00:00	0.933474	0.918272	0.950308	0.957456	0.905221	0.947808
2016-01-06 09:00:00	0.992591	0.976733	1.01335	1.01494	0.964815	1.00689
2016-01-06 10:00:00	1.44921	1.44468	1.36371	1.45868	1.42265	1.46388
2016-01-06 11:00:00	1.41949	1.39658	1.42639	1.41032	1.39544	1.43449
2016-01-06 12:00:00	1.19633	1.15823	1.2208	1.18412	1.17056	1.21055
2016-01-06 13:00:00	0.726452	0.699604	0.837449	0.744027	0.699557	0.741167
2016-01-06 14:00:00	0.737549	0.71821	0.807685	0.750078	0.711091	0.752218
2016-01-06 15:00:00	0.368096	0.366669	0.492714	0.399139	0.343236	0.383984
2016-01-06 16:00:00	0.362285	0.366802	0.511919	0.394237	0.337625	0.378173
2016-01-06 17:00:00	0.315956	0.324643	0.466526	0.355568	0.291593	0.332211
2016-01-06 18:00:00	0.141357	0.162811	0.36878	0.198628	0.11898	0.158535
2016-01-06 19:00:00	0.165207	0.186889	0.391335	0.220012	0.142337	0.182086
2016-01-06 20:00:00	0.273908	0.290194	0.470029	0.319745	0.249557	0.290163
2016-01-06 21:00:00	0.71622	0.716401	0.78673	0.748688	0.688957	0.730697
2016-01-06 22:00:00	0.545664	0.557375	0.653117	0.582218	0.51869	0.560589
2016-01-06 23:00:00	2.15654	2.13953	2.04683	2.14808	2.13767	2.17229
2016-01-07	2.02625	2.04793	1.9039	2.00916	2.00612	2.04281
2016-01-07 01:00:00	2.07198	2.06829	1.91943	2.03246	2.05351	2.09123
2016-01-07 02:00:00	1.28255	1.27195	1.23377	1.25009	1.25701	1.29912
2016-01-07 03:00:00	1.22006	1.2088	1.12242	1.18319	1.19577	1.23647
2016-01-07 04:00:00	0.660853	0.659846	0.720618	0.673468	0.634605	0.675647
2016-01-07 05:00:00	0.580155	0.568099	0.668939	0.619876	0.553779	0.595454
2016-01-07 06:00:00	0.688944	0.661766	0.769433	0.718713	0.660971	0.703876
2016-01-07 07:00:00	0.933253	0.917852	0.977139	0.965702	0.905115	0.947739
2016-01-07 08:00:00	0.798615	0.785855	0.84604	0.834633	0.77015	0.813233
2016-01-07 09:00:00	0.808942	0.797357	0.857318	0.843754	0.780764	0.823498
2016-01-07 10:00:00	1.31103	1.30142	1.27525	1.3318	1.28397	1.3254
2016-01-07 11:00:00	0.936174	0.912758	0.971249	0.957329	0.908649	0.950447
2016-01-07 12:00:00	1.02147	0.976922	1.0892	1.02398	0.996054	1.03591
2016-01-07 13:00:00	0.72402	0.679096	0.81378	0.738602	0.695982	0.73877
2016-01-07 14:00:00	0.977719	0.946931	1.02594	0.995129	0.951563	0.992218
2016-01-07 15:00:00	0.700569	0.68645	0.779987	0.722997	0.673616	0.715287
2016-01-07 16:00:00	0.573016	0.554072	0.618136	0.59625	0.547113	0.588296
2016-01-07 17:00:00	0.639399	0.620553	0.726287	0.656341	0.613063	0.654183
2016-01-07 18:00:00	0.265101	0.267418	0.453037	0.291008	0.241101	0.281922
2016-01-07 19:00:00	0.530808	0.527342	0.60292	0.55384	0.504612	0.546259
2016-01-07 20:00:00	0.761811	0.751819	0.852889	0.787569	0.734831	0.776416
2016-01-07 21:00:00	1.07623	1.06866	1.07256	1.09595	1.04957	1.09021
2016-01-07 22:00:00	1.04309	1.04261	1.07767	1.05569	1.01679	1.05703
2016-01-07 23:00:00	1.50869	1.46854	1.49322	1.49762	1.48419	1.52288
2016-01-08	1.18172	1.15683	1.15703	1.17475	1.15731	1.1972
2016-01-08 01:00:00	1.45048	1.44656	1.37547	1.43473	1.42599	1.46775
2016-01-08 02:00:00	1.09023	1.04767	1.06736	1.10591	1.06463	1.10546
2016-01-08 03:00:00	1.21522	1.19241	1.21694	1.20105	1.19	1.22974
2016-01-08 04:00:00	1.29492	1.2839	1.26306	1.30376	1.2707	1.30959
2016-01-08 05:00:00	1.02086	1.00597	1.02869	1.04716	0.994799	1.03578
2016-01-08 06:00:00	0.916882	0.89697	0.927842	0.953836	0.890205	0.931521
2016-01-08 07:00:00	1.12244	1.10226	1.13251	1.15547	1.09608	1.13692
2016-01-08 08:00:00	0.885446	0.859958	0.90908	0.917767	0.858788	0.900065
2016-01-08 09:00:00	1.01093	0.985183	1.02657	1.03889	0.984518	1.0254
2016-01-08 10:00:00	1.38039	1.36151	1.3252	1.40652	1.35491	1.39493
2016-01-08 11:00:00	0.866264	0.837575	0.887854	0.893096	0.839653	0.880838
2016-01-08 12:00:00	1.36085	1.30822	1.38018	1.35569	1.33762	1.37529
2016-01-08 13:00:00	0.776939	0.731922	0.879416	0.785594	0.750345	0.791755
2016-01-08 14:00:00	1.20385	1.16077	1.14289	1.16588	1.17739	1.21828
2016-01-08 15:00:00	1.00745	0.975264	0.9846	0.988868	0.981798	1.0232
2016-01-08 16:00:00	0.787403	0.770252	0.830945	0.819296	0.76083	0.801981
2016-01-08 17:00:00	0.621382	0.60895	0.686294	0.640595	0.595466	0.636377
2016-01-08 18:00:00	0.716826	0.704164	0.763898	0.726138	0.691089	0.73174
2016-01-08 19:00:00	1.11896	1.11169	1.1437	1.12901	1.09264	1.13339
2016-01-08 20:00:00	1.60637	1.59579	1.55825	1.61762	1.58294	1.62104
2016-01-08 21:00:00	1.37142	1.36465	1.35201	1.36559	1.34693	1.38564
2016-01-08 22:00:00	1.38149	1.38935	1.34266	1.38992	1.35637	1.39539
2016-01-08 23:00:00	1.02549	1.01767	1.08659	1.02172	1.00031	1.03942
2016-01-09	0.81724	0.799938	0.852858	0.830458	0.791456	0.831842
2016-01-09 01:00:00	0.726029	0.722498	0.778882	0.738681	0.701124	0.740716
2016-01-09 02:00:00	0.826121	0.809097	0.884156	0.827615	0.802156	0.840842
2016-01-09 03:00:00	0.850156	0.857674	0.86549	0.82803	0.824143	0.86621
2016-01-09 04:00:00	0.867271	0.860271	0.894481	0.869609	0.842058	0.881779
2016-01-09 05:00:00	0.738603	0.726829	0.795797	0.753705	0.713523	0.753838
2016-01-09 06:00:00	0.693258	0.685107	0.751093	0.70751	0.66764	0.708282
2016-01-09 07:00:00	0.755591	0.738844	0.806617	0.779965	0.729747	0.770433
2016-01-09 08:00:00	0.6504	0.635718	0.710965	0.671133	0.624243	0.665425
2016-01-09 09:00:00	0.730124	0.716291	0.787685	0.748997	0.703457	0.744772
2016-01-09 10:00:00	0.763392	0.743083	0.811489	0.786725	0.73738	0.778169
2016-01-09 11:00:00	0.807306	0.779801	0.841986	0.814579	0.779909	0.821776
2016-01-09 12:00:00	1.10799	1.05885	1.1205	1.1039	1.08075	1.12212
2016-01-09 13:00:00	1.14947	1.09338	1.18564	1.13486	1.12413	1.16387
2016-01-09 14:00:00	0.929825	0.892154	0.978048	0.935257	0.902245	0.944046
2016-01-09 15:00:00	0.798377	0.783805	0.844835	0.815543	0.772123	0.813345
2016-01-09 16:00:00	0.595278	0.587033	0.657658	0.621923	0.569067	0.610459
2016-01-09 17:00:00	0.499068	0.500475	0.589419	0.509692	0.473585	0.514317
2016-01-09 18:00:00	0.973608	0.963112	0.989235	0.9885	0.94755	0.987942
2016-01-09 19:00:00	0.659075	0.657023	0.6886	0.666769	0.633065	0.673954
2016-01-09 20:00:00	0.956299	0.95865	0.957135	0.966044	0.929611	0.970206
2016-01-09 21:00:00	1.25482	1.24674	1.26928	1.27597	1.23006	1.26895
2016-01-09 22:00:00	1.78678	1.79379	1.7532	1.77161	1.76585	1.80154
2016-01-09 23:00:00	1.79238	1.76063	1.76952	1.76444	1.76952	1.80718
2016-01-10	1.83104	1.80257	1.80722	1.80754	1.80911	1.84681
2016-01-10 01:00:00	1.16059	1.10992	1.13712	1.15073	1.13384	1.17537
2016-01-10 02:00:00	1.37422	1.32748	1.3789	1.34261	1.35049	1.39001
2016-01-10 03:00:00	0.727984	0.718524	0.835884	0.714033	0.702533	0.743657
2016-01-10 04:00:00	0.8118	0.804243	0.861552	0.76477	0.786605	0.827207
2016-01-10 05:00:00	0.80155	0.768174	0.846919	0.788778	0.776846	0.815762
2016-01-10 06:00:00	0.659798	0.635745	0.716584	0.650479	0.634789	0.674376
2016-01-10 07:00:00	0.677124	0.653597	0.744975	0.666806	0.651604	0.691512
2016-01-10 08:00:00	0.743946	0.708096	0.799453	0.736521	0.717915	0.758318
2016-01-10 09:00:00	0.678683	0.645377	0.742895	0.673527	0.652696	0.693218
2016-01-10 10:00:00	0.736539	0.705404	0.791031	0.727378	0.709607	0.750747
2016-01-10 11:00:00	0.755316	0.721136	0.809516	0.74612	0.728315	0.76959
2016-01-10 12:00:00	1.07079	1.02691	1.07673	1.0659	1.04349	1.08495
2016-01-10 13:00:00	1.1006	1.06501	1.15564	1.08582	1.0749	1.11496
2016-01-10 14:00:00	1.92053	1.88143	1.88159	1.89849	1.89753	1.93561
2016-01-10 15:00:00	1.40471	1.34767	1.35076	1.33963	1.38019	1.42061
2016-01-10 16:00:00	1.42653	1.38269	1.31972	1.40286	1.40139	1.44271
2016-01-10 17:00:00	1.27795	1.24407	1.31632	1.30669	1.25257	1.29253
2016-01-10 18:00:00	0.921103	0.905431	0.932653	0.964485	0.894703	0.935302
2016-01-10 19:00:00	0.813663	0.808869	0.834225	0.819378	0.786919	0.827802
2016-01-10 20:00:00	0.774494	0.78299	0.818317	0.785971	0.747523	0.788736
2016-01-10 21:00:00	1.2386	1.23036	1.28388	1.23768	1.2127	1.25249
2016-01-10 22:00:00	1.45782	1.45982	1.45692	1.44647	1.43268	1.47172
2016-01-10 23:00:00	2.93702	2.8736	2.76494	2.84444	2.91957	2.95722
2016-01-11	1.47151	1.43654	1.4131	1.45158	1.44697	1.48625
2016-01-11 01:00:00	2.4324	2.39819	2.30757	2.36139	2.41248	2.45083
2016-01-11 02:00:00	1.8309	1.86455	1.8033	1.78017	1.8107	1.84873
2016-01-11 03:00:00	1.37039	1.37608	1.25389	1.32489	1.34622	1.38649
2016-01-11 04:00:00	0.841385	0.835712	0.819095	0.850762	0.815131	0.855975
2016-01-11 05:00:00	0.522057	0.51783	0.633432	0.565214	0.49732	0.537616
2016-01-11 06:00:00	0.561221	0.557614	0.654509	0.597567	0.53555	0.576504
2016-01-11 07:00:00	0.866066	0.857099	0.906053	0.89796	0.839523	0.880656
2016-01-11 08:00:00	0.761281	0.748239	0.809607	0.793224	0.734822	0.776098
2016-01-11 09:00:00	0.92605	0.918918	0.94616	0.956014	0.898846	0.94034
2016-01-11 10:00:00	1.1441	1.13363	1.1451	1.16784	1.11752	1.15843
2016-01-11 11:00:00	1.1307	1.12291	1.14989	1.16035	1.10367	1.14499
2016-01-11 12:00:00	0.620536	0.60743	0.69303	0.647062	0.594723	0.635572
2016-01-11 13:00:00	0.827289	0.793239	0.914759	0.842573	0.80046	0.841887
2016-01-11 14:00:00	1.49915	1.47655	1.48918	1.46429	1.4747	1.51364
2016-01-11 15:00:00	1.54445	1.52038	1.54612	1.51621	1.52052	1.55909
2016-01-11 16:00:00	1.50563	1.49134	1.50763	1.4743	1.48226	1.5204
2016-01-11 17:00:00	0.721154	0.717895	0.802892	0.73251	0.696654	0.736208
2016-01-11 18:00:00	1.25885	1.24544	1.23415	1.28718	1.23393	1.27279
2016-01-11 19:00:00	0.688304	0.689773	0.729182	0.694928	0.661855	0.702767
2016-01-11 20:00:00	0.603482	0.615547	0.690637	0.632855	0.576772	0.618075
2016-01-11 21:00:00	1.15611	1.1633	1.14964	1.17528	1.12933	1.16981
2016-01-11 22:00:00	1.17394	1.16885	1.17206	1.21444	1.14761	1.18795
2016-01-11 23:00:00	1.13773	1.13933	1.13266	1.16755	1.11134	1.15155
2016-01-12	1.57728	1.5736	1.57684	1.59371	1.55436	1.59217
2016-01-12 01:00:00	1.73467	1.75011	1.62879	1.759	1.71183	1.74989
2016-01-12 02:00:00	1.21078	1.19861	1.22206	1.2094	1.18661	1.22525
2016-01-12 03:00:00	1.28556	1.25436	1.25198	1.28016	1.2601	1.30014
2016-01-12 04:00:00	2.23848	2.20571	2.1772	2.21883	2.21906	2.25645
2016-01-12 05:00:00	1.40976	1.37929	1.31592	1.36648	1.38273	1.42207
2016-01-12 06:00:00	0.858077	0.849134	0.887113	0.893561	0.831943	0.872708
2016-01-12 07:00:00	0.963772	0.955208	1.01214	0.996754	0.937698	0.978247
2016-01-12 08:00:00	0.851033	0.834195	0.884416	0.878611	0.825155	0.865655
2016-01-12 09:00:00	1.02521	1.01156	1.06647	1.04846	0.999199	1.03966
2016-01-12 10:00:00	1.36863	1.38027	1.29075	1.39229	1.34388	1.38354
2016-01-12 11:00:00	1.03357	1.03619	1.06661	1.05588	1.00902	1.04809
2016-01-12 12:00:00	1.18436	1.17081	1.21047	1.14782	1.16116	1.19851
2016-01-12 13:00:00	0.788884	0.751011	0.906442	0.747887	0.76265	0.803552
2016-01-12 14:00:00	0.74705	0.729788	0.80878	0.742259	0.722034	0.761506
2016-01-12 15:00:00	0.707683	0.691841	0.767852	0.721888	0.681872	0.722349
2016-01-12 16:00:00	0.518518	0.513071	0.597742	0.541831	0.493515	0.533773
2016-01-12 17:00:00	0.900065	0.905749	0.925009	0.918529	0.875017	0.914298
2016-01-12 18:00:00	0.388388	0.391816	0.533601	0.421057	0.364698	0.404047
2016-01-12 19:00:00	0.635489	0.645591	0.691208	0.665253	0.610747	0.650061
2016-01-12 20:00:00	1.00903	1.01722	1.00848	1.03594	0.983345	1.02293
2016-01-12 21:00:00	0.995633	1.00415	0.991766	1.02292	0.969277	1.00951
2016-01-12 22:00:00	1.15867	1.18124	1.12032	1.1627	1.13232	1.17375
2016-01-12 23:00:00	1.51436	1.54805	1.38037	1.49219	1.48759	1.53505
2016-01-13	1.03368	1.04062	1.04214	1.05241	1.00963	1.04808
2016-01-13 01:00:00	1.13425	1.15059	1.09853	1.13101	1.10944	1.14961
2016-01-13 02:00:00	0.891986	0.908306	0.879502	0.88862	0.867736	0.907906
2016-01-13 03:00:00	1.2541	1.2788	1.25666	1.24441	1.23004	1.26903
2016-01-13 04:00:00	1.11741	1.12432	1.14716	1.14179	1.09218	1.13179
2016-01-13 05:00:00	0.856119	0.850456	0.887191	0.88725	0.830164	0.870722
2016-01-13 06:00:00	1.0107	1.00846	1.05861	1.03873	0.984468	1.02506
2016-01-13 07:00:00	0.893728	0.886067	0.921811	0.920296	0.866985	0.908186
2016-01-13 08:00:00	0.874376	0.862725	0.905786	0.901462	0.847787	0.888874
2016-01-13 09:00:00	1.03739	1.03052	1.07641	1.06616	1.01058	1.05172
2016-01-13 10:00:00	1.41913	1.42627	1.33836	1.44816	1.39289	1.4336
2016-01-13 11:00:00	1.28276	1.2839	1.24739	1.31606	1.256	1.29706
2016-01-13 12:00:00	1.54508	1.50133	1.52752	1.53482	1.5214	1.55971
2016-01-13 13:00:00	1.79124	1.7695	1.70335	1.7559	1.76862	1.80626
2016-01-13 14:00:00	1.1814	1.16375	1.14814	1.16252	1.1561	1.1974
2016-01-13 15:00:00	1.26557	1.23954	1.29008	1.27411	1.24121	1.28117
2016-01-13 16:00:00	0.548066	0.543811	0.662985	0.588772	0.521731	0.563162
2016-01-13 17:00:00	0.571132	0.567316	0.688228	0.610315	0.544624	0.586108
2016-01-13 18:00:00	0.275471	0.285208	0.449077	0.319546	0.251347	0.291861
2016-01-13 19:00:00	0.356949	0.357639	0.519369	0.402638	0.332628	0.372945
2016-01-13 20:00:00	0.668874	0.678338	0.778337	0.689403	0.642393	0.683382
2016-01-13 21:00:00	1.59875	1.62609	1.52996	1.59561	1.57599	1.61555
2016-01-13 22:00:00	1.39919	1.42329	1.31953	1.40697	1.3745	1.41359
2016-01-13 23:00:00	1.38069	1.40254	1.33646	1.39505	1.3566	1.39464
2016-01-14	1.48221	1.50149	1.39487	1.50404	1.45903	1.49683
2016-01-14 01:00:00	1.29819	1.29229	1.28563	1.30807	1.27545	1.31261
2016-01-14 02:00:00	1.26418	1.28211	1.22259	1.24586	1.24153	1.28039
2016-01-14 03:00:00	0.671608	0.676313	0.700362	0.701987	0.647106	0.686468
2016-01-14 04:00:00	0.741499	0.738688	0.812529	0.780693	0.716097	0.756272
2016-01-14 05:00:00	0.680571	0.673371	0.75543	0.716038	0.655173	0.695548
2016-01-14 06:00:00	1.09985	1.1023	1.12044	1.13397	1.07362	1.1142
2016-01-14 07:00:00	0.829396	0.820987	0.866888	0.861636	0.803134	0.844015
2016-01-14 08:00:00	0.86467	0.854721	0.899172	0.895594	0.838186	0.87921
2016-01-14 09:00:00	1.10975	1.10563	1.13007	1.14116	1.08314	1.12403
2016-01-14 10:00:00	1.23762	1.23927	1.20973	1.26152	1.21135	1.25211
2016-01-14 11:00:00	1.2179	1.20374	1.20781	1.22488	1.19321	1.23262
2016-01-14 12:00:00	1.4445	1.39114	1.43821	1.41841	1.42028	1.45934
2016-01-14 13:00:00	1.41492	1.39444	1.38606	1.38547	1.39175	1.43148
2016-01-14 14:00:00	0.835198	0.811894	0.837245	0.829514	0.80921	0.851441
2016-01-14 15:00:00	0.798634	0.782214	0.822136	0.758406	0.772964	0.814364
2016-01-14 16:00:00	0.268161	0.276701	0.41151	0.301394	0.244658	0.284735
2016-01-14 17:00:00	0.969263	0.971625	1.01894	0.981219	0.942418	0.983465
2016-01-14 18:00:00	0.619906	0.618191	0.687625	0.634318	0.594414	0.634602
2016-01-14 19:00:00	0.492599	0.483112	0.572323	0.518804	0.467516	0.508002
2016-01-14 20:00:00	0.492103	0.499228	0.616276	0.515176	0.466314	0.507151
2016-01-14 21:00:00	1.25225	1.25638	1.21767	1.27191	1.22546	1.26609
2016-01-14 22:00:00	1.11647	1.11466	1.13523	1.1515	1.08981	1.13037
2016-01-14 23:00:00	1.13742	1.13785	1.17226	1.16209	1.11113	1.15112
2016-01-15	1.44234	1.42871	1.33238	1.43821	1.41949	1.45752
2016-01-15 01:00:00	1.14819	1.13018	1.13	1.14395	1.12177	1.16331
2016-01-15 02:00:00	0.765183	0.748965	0.790077	0.7823	0.740215	0.779855
2016-01-15 03:00:00	1.0246	1.00671	1.01124	1.03942	0.998959	1.0391
2016-01-15 04:00:00	1.03359	1.01209	0.993677	1.0591	1.00752	1.04798
2016-01-15 05:00:00	0.819982	0.800316	0.850304	0.851643	0.794028	0.834703
2016-01-15 06:00:00	0.724688	0.709392	0.786354	0.753877	0.698499	0.739469
2016-01-15 07:00:00	0.766013	0.743609	0.807729	0.801184	0.739697	0.78084
2016-01-15 08:00:00	0.913748	0.89665	0.935354	0.953229	0.886513	0.928069
2016-01-15 09:00:00	0.795016	0.771534	0.829651	0.83056	0.76844	0.809736
2016-01-15 10:00:00	1.27614	1.27324	1.21178	1.31741	1.24966	1.29059
2016-01-15 11:00:00	0.882612	0.860179	0.932728	0.90502	0.856568	0.897669
2016-01-15 12:00:00	1.42022	1.3649	1.41549	1.40875	1.39641	1.43489
2016-01-15 13:00:00	0.770433	0.743317	0.82209	0.789511	0.744504	0.78523
2016-01-15 14:00:00	0.489642	0.480955	0.614172	0.510701	0.463884	0.505114
2016-01-15 15:00:00	0.283	0.280838	0.451301	0.336932	0.259273	0.299468
2016-01-15 16:00:00	0.470137	0.462703	0.587299	0.511222	0.444426	0.485507
2016-01-15 17:00:00	0.428158	0.42067	0.556988	0.479679	0.403412	0.443842
2016-01-15 18:00:00	0.238182	0.247936	0.450524	0.282138	0.214818	0.254617
2016-01-15 19:00:00	0.346724	0.346453	0.502009	0.390126	0.322836	0.362706
2016-01-15 20:00:00	0.732207	0.723173	0.764569	0.750737	0.705874	0.746395
2016-01-15 21:00:00	1.24341	1.21121	1.20278	1.24857	1.21773	1.2573
2016-01-15 22:00:00	0.962011	0.934704	0.975557	0.959402	0.935235	0.975684
2016-01-15 23:00:00	1.41571	1.35543	1.38252	1.40067	1.39095	1.42956
2016-01-16	1.33222	1.31131	1.32822	1.30659	1.30769	1.3463
2016-01-16 01:00:00	1.6304	1.60763	1.50178	1.59448	1.60437	1.64491
2016-01-16 02:00:00	0.820187	0.803417	0.861019	0.79275	0.794314	0.834267
2016-01-16 03:00:00	0.862214	0.833104	0.857322	0.832797	0.836206	0.876384
2016-01-16 04:00:00	1.13833	1.09129	1.12501	1.09022	1.10855	1.15033
2016-01-16 05:00:00	1.22449	1.17647	1.21689	1.23719	1.19486	1.23736
2016-01-16 06:00:00	0.580702	0.582256	0.649479	0.604432	0.553814	0.595817
2016-01-16 07:00:00	0.724612	0.720704	0.780177	0.735279	0.698367	0.739719
2016-01-16 08:00:00	0.745695	0.743118	0.79769	0.7608	0.719382	0.760663
2016-01-16 09:00:00	0.819987	0.821275	0.866862	0.837235	0.792859	0.834271
2016-01-16 10:00:00	0.810678	0.802653	0.853681	0.840943	0.784138	0.825154
2016-01-16 11:00:00	0.913681	0.908932	0.932263	0.932222	0.886447	0.927796
2016-01-16 12:00:00	1.14937	1.14473	1.15673	1.1762	1.12271	1.16354
2016-01-16 13:00:00	0.85339	0.853164	0.898602	0.878326	0.82611	0.867621
2016-01-16 14:00:00	0.849022	0.835029	0.885875	0.869106	0.822296	0.863317
2016-01-16 15:00:00	0.736396	0.730411	0.799976	0.761059	0.70992	0.750911
2016-01-16 16:00:00	0.83581	0.838679	0.88331	0.858722	0.808948	0.850013
2016-01-16 17:00:00	0.651289	0.645457	0.718371	0.683649	0.625384	0.66605
2016-01-16 18:00:00	1.10911	1.10664	1.10038	1.11798	1.08344	1.12317
2016-01-16 19:00:00	1.12833	1.13228	1.13464	1.14789	1.10287	1.14262
2016-01-16 20:00:00	1.14668	1.14175	1.15941	1.16928	1.121	1.1608
2016-01-16 21:00:00	1.47956	1.47707	1.48516	1.50109	1.45554	1.4939
2016-01-16 22:00:00	1.18248	1.17906	1.15357	1.20833	1.15636	1.19638
2016-01-16 23:00:00	1.54701	1.54629	1.57243	1.55905	1.5231	1.56127
2016-01-17	1.49637	1.50036	1.48342	1.49697	1.47399	1.51139
2016-01-17 01:00:00	1.51348	1.49538	1.51244	1.53711	1.49166	1.52849
2016-01-17 02:00:00	1.7082	1.71071	1.60861	1.66238	1.68519	1.72534
2016-01-17 03:00:00	1.42841	1.41756	1.37485	1.40126	1.4026	1.44103
2016-01-17 04:00:00	1.09646	1.08768	1.08387	1.09929	1.07132	1.11063
2016-01-17 05:00:00	0.73612	0.712306	0.777847	0.766314	0.710829	0.751064
2016-01-17 06:00:00	0.641343	0.624961	0.706342	0.682002	0.615366	0.656414
2016-01-17 07:00:00	0.912061	0.894689	0.930848	0.954809	0.885674	0.926559
2016-01-17 08:00:00	0.582771	0.562052	0.649519	0.621606	0.556825	0.597996
2016-01-17 09:00:00	1.06135	1.03748	1.09083	1.10512	1.03529	1.07575
2016-01-17 10:00:00	0.829992	0.806063	0.86291	0.863014	0.803311	0.844401
2016-01-17 11:00:00	0.875986	0.848383	0.908063	0.919185	0.84986	0.890496
2016-01-17 12:00:00	1.34646	1.32863	1.31437	1.36027	1.3228	1.36067
2016-01-17 13:00:00	1.43759	1.41295	1.45576	1.42395	1.41245	1.45195
2016-01-17 14:00:00	0.734921	0.729382	0.796269	0.755766	0.708861	0.749544
2016-01-17 15:00:00	0.617084	0.616439	0.675327	0.638815	0.591028	0.631844
2016-01-17 16:00:00	0.866148	0.856292	0.911212	0.88975	0.838715	0.880429
2016-01-17 17:00:00	0.660522	0.652439	0.715944	0.684935	0.633794	0.675163
2016-01-17 18:00:00	1.12219	1.12226	1.12595	1.12231	1.09742	1.13624
2016-01-17 19:00:00	1.38328	1.39767	1.36605	1.41265	1.3599	1.39749
2016-01-17 20:00:00	0.782567	0.784155	0.827452	0.817485	0.756663	0.797075
2016-01-17 21:00:00	1.49664	1.52251	1.45034	1.52175	1.47371	1.51142
2016-01-17 22:00:00	1.74429	1.75297	1.74244	1.7583	1.72261	1.75975
2016-01-17 23:00:00	1.59446	1.54288	1.52642	1.58219	1.56984	1.60889
2016-01-18	2.63366	2.58579	2.61816	2.59474	2.61387	2.65228
2016-01-18 01:00:00	2.86831	2.82366	2.72594	2.81686	2.84797	2.88828
2016-01-18 02:00:00	2.6382	2.5698	2.53165	2.54284	2.61793	2.65811
2016-01-18 03:00:00	1.76871	1.69805	1.74897	1.70427	1.74597	1.78597
2016-01-18 04:00:00	0.97887	0.963549	1.04133	0.996052	0.952386	0.993394
2016-01-18 05:00:00	0.606075	0.607407	0.686327	0.640792	0.579883	0.621134
2016-01-18 06:00:00	0.640279	0.633512	0.712713	0.677186	0.614805	0.655347
2016-01-18 07:00:00	0.733224	0.727505	0.794964	0.76206	0.707836	0.74798
2016-01-18 08:00:00	0.903217	0.898399	0.934017	0.934331	0.877108	0.917541
2016-01-18 09:00:00	1.00278	0.991628	1.02008	1.03507	0.976768	1.01712
2016-01-18 10:00:00	1.34328	1.3567	1.2777	1.3762	1.31821	1.35763
2016-01-18 11:00:00	0.865604	0.857582	0.889353	0.892244	0.839506	0.87988
2016-01-18 12:00:00	0.918276	0.906563	0.948118	0.953882	0.891922	0.932613
2016-01-18 13:00:00	1.06911	1.04831	1.08281	1.08956	1.04354	1.08334
2016-01-18 14:00:00	1.56708	1.53314	1.48653	1.55801	1.54292	1.5817
2016-01-18 15:00:00	1.79987	1.78196	1.7814	1.76424	1.7771	1.81533
2016-01-18 16:00:00	1.80694	1.77442	1.76162	1.77248	1.78515	1.82242
2016-01-18 17:00:00	2.13195	2.10803	2.04638	2.10191	2.11183	2.14854
2016-01-18 18:00:00	1.99274	2.03163	1.83162	1.99419	1.97305	2.00843
2016-01-18 19:00:00	1.47693	1.49521	1.466	1.47989	1.45431	1.49145
2016-01-18 20:00:00	1.36488	1.3787	1.32727	1.38685	1.3407	1.37911
2016-01-18 21:00:00	1.96317	1.99921	1.87297	1.96719	1.94265	1.97897
2016-01-18 22:00:00	2.43418	2.49517	2.34456	2.42595	2.41687	2.45209
2016-01-18 23:00:00	1.91727	1.94149	1.85927	1.93553	1.89542	1.93305
2016-01-19	1.2535	1.26402	1.2297	1.28659	1.22754	1.26798
2016-01-19 01:00:00	1.15151	1.15936	1.15746	1.18418	1.12543	1.16588
2016-01-19 02:00:00	1.10237	1.08902	1.08834	1.08926	1.07583	1.11665
2016-01-19 03:00:00	1.56804	1.57854	1.52893	1.57079	1.54308	1.5828
2016-01-19 04:00:00	1.28256	1.28997	1.24122	1.31316	1.25597	1.29699
2016-01-19 05:00:00	1.13606	1.13691	1.13465	1.1676	1.10904	1.15037
2016-01-19 06:00:00	1.25551	1.26302	1.21721	1.28617	1.22861	1.26976
2016-01-19 07:00:00	1.36963	1.37393	1.29507	1.39999	1.34273	1.38405
2016-01-19 08:00:00	1.41123	1.41726	1.33957	1.44495	1.38496	1.4257
2016-01-19 09:00:00	1.28194	1.27342	1.23036	1.31274	1.2549	1.29615
2016-01-19 10:00:00	1.40383	1.40224	1.33766	1.44037	1.377	1.41817
2016-01-19 11:00:00	1.35931	1.35344	1.35479	1.39646	1.33298	1.37369
2016-01-19 12:00:00	1.6781	1.61141	1.63176	1.65716	1.65469	1.69306
2016-01-19 13:00:00	1.80091	1.78211	1.77157	1.75202	1.77952	1.81824
2016-01-19 14:00:00	1.85452	1.80952	1.79029	1.66643	1.82576	1.85943
2016-01-19 15:00:00	0.750207	0.745571	0.822691	0.773957	0.723967	0.764731
2016-01-19 16:00:00	0.611742	0.614525	0.672174	0.646486	0.585509	0.626654
2016-01-19 17:00:00	1.05066	1.0481	1.10366	1.06492	1.02444	1.06478
2016-01-19 18:00:00	1.64978	1.65571	1.5064	1.66579	1.62535	1.6644
2016-01-19 19:00:00	1.42552	1.424	1.33597	1.44706	1.40018	1.43972
2016-01-19 20:00:00	0.897375	0.894174	0.906962	0.93538	0.869913	0.911464
2016-01-19 21:00:00	1.52397	1.53508	1.46409	1.52786	1.49926	1.53924
2016-01-19 22:00:00	1.43713	1.43867	1.33345	1.44088	1.41243	1.45259
2016-01-19 23:00:00	1.86222	1.88914	1.80537	1.86026	1.84106	1.87826
2016-01-20	1.39968	1.41492	1.34423	1.39285	1.37635	1.41499
2016-01-20 01:00:00	1.46069	1.47403	1.4139	1.44762	1.43672	1.47654
2016-01-20 02:00:00	0.820721	0.820819	0.854832	0.839428	0.795741	0.835299
2016-01-20 03:00:00	1.06528	1.06563	1.04628	1.08114	1.0393	1.07958
2016-01-20 04:00:00	1.22903	1.23332	1.22784	1.2663	1.20244	1.24333
2016-01-20 05:00:00	0.964356	0.958793	1.01756	0.999174	0.938068	0.978846
2016-01-20 06:00:00	1.0076	1.00147	1.05419	1.04307	0.981031	1.02201
2016-01-20 07:00:00	1.13616	1.13234	1.15661	1.17416	1.10935	1.15047
2016-01-20 08:00:00	0.866839	0.856259	0.907592	0.902814	0.839843	0.88127
2016-01-20 09:00:00	0.90534	0.88895	0.924896	0.938028	0.878425	0.919787
2016-01-20 10:00:00	1.5205	1.5143	1.42939	1.55572	1.49413	1.53512
2016-01-20 11:00:00	1.26384	1.25222	1.23866	1.30232	1.23701	1.27815
2016-01-20 12:00:00	1.25233	1.20074	1.23778	1.24886	1.22728	1.26658
2016-01-20 13:00:00	0.834498	0.820434	0.860314	0.858959	0.808185	0.849055
2016-01-20 14:00:00	0.711014	0.695168	0.789563	0.742089	0.684895	0.725847
2016-01-20 15:00:00	0.325126	0.330682	0.47062	0.364933	0.301281	0.341427
2016-01-20 16:00:00	0.465497	0.471909	0.562384	0.507401	0.439696	0.481188
2016-01-20 17:00:00	0.245046	0.263272	0.421117	0.295869	0.221355	0.261635
2016-01-20 18:00:00	0.0886597	0.122644	0.342701	0.150945	0.0669577	0.106129
2016-01-20 19:00:00	0.477502	0.480728	0.600319	0.525614	0.451637	0.492918
2016-01-20 20:00:00	0.332144	0.351453	0.510425	0.386372	0.306846	0.348149
2016-01-20 21:00:00	1.30919	1.30721	1.30278	1.34593	1.28318	1.32331
2016-01-20 22:00:00	1.40802	1.4093	1.36539	1.44101	1.38345	1.42254
2016-01-20 23:00:00	1.64788	1.6297	1.61299	1.69586	1.62523	1.66278
2016-01-21	1.35199	1.35973	1.34623	1.37411	1.32786	1.36666
2016-01-21 01:00:00	1.02038	1.02965	1.11693	1.04271	0.994835	1.03462
2016-01-21 02:00:00	1.08071	1.06976	1.05007	1.07098	1.05592	1.09597
2016-01-21 03:00:00	0.781424	0.786369	0.812344	0.79533	0.755799	0.795951
2016-01-21 04:00:00	0.871919	0.864946	0.882613	0.904857	0.845605	0.88652
2016-01-21 05:00:00	1.05673	1.05161	1.13431	1.09393	1.03028	1.07114
2016-01-21 06:00:00	0.746883	0.742036	0.810347	0.786737	0.720289	0.761563
2016-01-21 07:00:00	0.902966	0.891786	0.93632	0.942423	0.876223	0.917501
2016-01-21 08:00:00	0.878704	0.866737	0.919478	0.918327	0.851614	0.893221
2016-01-21 09:00:00	0.760368	0.749858	0.816802	0.799918	0.733013	0.774982
2016-01-21 10:00:00	1.43178	1.42285	1.40185	1.47365	1.40469	1.44628
2016-01-21 11:00:00	1.00864	0.990227	1.0602	1.04812	0.981113	1.02297
2016-01-21 12:00:00	0.980907	0.947414	1.0426	0.993249	0.954575	0.995174
2016-01-21 13:00:00	0.78038	0.764975	0.829601	0.812672	0.75377	0.79513
2016-01-21 14:00:00	0.493962	0.485091	0.579226	0.536492	0.468036	0.50948
2016-01-21 15:00:00	0.706448	0.70448	0.778351	0.750316	0.67901	0.721243
2016-01-21 16:00:00	0.304651	0.318886	0.45976	0.35678	0.280043	0.321078
2016-01-21 17:00:00	0.17306	0.200929	0.410888	0.225517	0.150335	0.190263
2016-01-21 18:00:00	0.376838	0.386081	0.528909	0.417854	0.351812	0.392683
2016-01-21 19:00:00	0.452369	0.451596	0.579662	0.462894	0.42734	0.469148
2016-01-21 20:00:00	0.802705	0.784629	0.810298	0.828862	0.775607	0.81867
2016-01-21 21:00:00	1.53606	1.51487	1.4771	1.50658	1.51142	1.5529
2016-01-21 22:00:00	1.16894	1.15939	1.22279	1.20621	1.14271	1.18342
2016-01-21 23:00:00	1.25866	1.20117	1.25994	1.2862	1.23203	1.27274
2016-01-22	1.41841	1.41821	1.32361	1.43805	1.39458	1.43291
2016-01-22 01:00:00	1.38559	1.38993	1.31146	1.36096	1.35993	1.40431
2016-01-22 02:00:00	1.0216	1.0041	0.983466	1.02891	0.99666	1.03693
2016-01-22 03:00:00	0.972895	0.954931	0.969568	1.0087	0.946907	0.987335
2016-01-22 04:00:00	0.933072	0.91191	0.963538	0.97807	0.906836	0.947605
2016-01-22 05:00:00	0.831099	0.806628	0.860495	0.874355	0.804713	0.845803
2016-01-22 06:00:00	1.10758	1.08429	1.12781	1.15683	1.08095	1.12191
2016-01-22 07:00:00	0.766685	0.739208	0.81659	0.806026	0.739951	0.781418
2016-01-22 08:00:00	1.06773	1.03863	1.09855	1.11808	1.04109	1.08213
2016-01-22 09:00:00	1.03364	1.00642	1.07879	1.08563	1.00665	1.04799
2016-01-22 10:00:00	1.11595	1.08882	1.124	1.1657	1.08898	1.13015
2016-01-22 11:00:00	1.16967	1.13937	1.16634	1.22448	1.14306	1.184
2016-01-22 12:00:00	1.36443	1.29057	1.36101	1.37812	1.34032	1.37884
2016-01-22 13:00:00	0.642414	0.618112	0.69112	0.673184	0.616334	0.657438
2016-01-22 14:00:00	0.662644	0.635298	0.742442	0.709466	0.63637	0.677646
2016-01-22 15:00:00	0.272129	0.269574	0.426822	0.325039	0.24808	0.288718
2016-01-22 16:00:00	0.471814	0.465846	0.561462	0.525908	0.445644	0.487287
2016-01-22 17:00:00	0.204353	0.211307	0.394733	0.265584	0.181003	0.221258
2016-01-22 18:00:00	0.565257	0.546616	0.623728	0.613133	0.539824	0.580479
2016-01-22 19:00:00	0.686193	0.670292	0.730246	0.724298	0.659754	0.70119
2016-01-22 20:00:00	1.48226	1.47432	1.43194	1.53206	1.45917	1.49717
2016-01-22 21:00:00	1.29236	1.27287	1.29108	1.34418	1.26808	1.30668
2016-01-22 22:00:00	1.42993	1.41303	1.39059	1.48198	1.40535	1.44412
2016-01-22 23:00:00	1.43275	1.43136	1.39753	1.49525	1.40923	1.44686
2016-01-23	0.913037	0.892191	0.929794	0.951295	0.889494	0.927606
2016-01-23 01:00:00	1.05079	1.04442	1.08602	1.10032	1.02677	1.06519
2016-01-23 02:00:00	0.823236	0.808348	0.854757	0.833587	0.800118	0.837775
2016-01-23 03:00:00	0.940607	0.946172	0.900979	0.951753	0.916663	0.955259
2016-01-23 04:00:00	0.819476	0.808698	0.855962	0.861155	0.795392	0.83417
2016-01-23 05:00:00	0.981585	0.977546	1.03145	1.01927	0.956558	0.995758
2016-01-23 06:00:00	0.768589	0.746146	0.80999	0.799079	0.744244	0.78327
2016-01-23 07:00:00	0.764843	0.750472	0.813605	0.815131	0.739665	0.77954
2016-01-23 08:00:00	0.895852	0.883712	0.928677	0.951553	0.870042	0.910258
2016-01-23 09:00:00	0.961099	0.939649	1.0046	1.02068	0.935285	0.975526
2016-01-23 10:00:00	0.729918	0.703467	0.788852	0.779779	0.70335	0.744543
2016-01-23 11:00:00	0.973194	0.941249	0.999107	1.03408	0.94661	0.9876
2016-01-23 12:00:00	1.38866	1.38364	1.3536	1.43902	1.36328	1.40336
2016-01-23 13:00:00	1.32673	1.30348	1.32441	1.3454	1.30298	1.34151
2016-01-23 14:00:00	0.982804	0.952182	1.01147	1.04836	0.956204	0.997286
2016-01-23 15:00:00	1.12246	1.11038	1.11144	1.16522	1.09645	1.13658
2016-01-23 16:00:00	1.30618	1.29435	1.31548	1.34352	1.28013	1.32057
2016-01-23 17:00:00	1.61524	1.62388	1.51481	1.64414	1.59167	1.62998
2016-01-23 18:00:00	1.51675	1.49188	1.47888	1.52645	1.49404	1.53159
2016-01-23 19:00:00	2.31202	2.28366	2.17327	2.28645	2.29258	2.32893
2016-01-23 20:00:00	1.73145	1.70958	1.74521	1.72375	1.70983	1.74861
2016-01-23 21:00:00	1.98475	1.93602	1.93949	2.01739	1.96349	2.00005
2016-01-23 22:00:00	2.69727	2.66438	2.55593	2.71094	2.68009	2.71527
2016-01-23 23:00:00	1.58461	1.52396	1.46043	1.58764	1.55938	1.59876
2016-01-24	1.26229	1.24602	1.26717	1.27866	1.23852	1.27672
2016-01-24 01:00:00	1.28139	1.30195	1.3185	1.26338	1.25641	1.29859
2016-01-24 02:00:00	1.24203	1.25291	1.20846	1.23149	1.21715	1.2585
2016-01-24 03:00:00	1.24116	1.2221	1.1998	1.22215	1.2158	1.25693
2016-01-24 04:00:00	1.24319	1.20141	1.2189	1.22382	1.2155	1.25584
2016-01-24 05:00:00	0.696088	0.689239	0.770677	0.729322	0.670338	0.71092
2016-01-24 06:00:00	0.519664	0.515377	0.626229	0.557372	0.494776	0.535147
2016-01-24 07:00:00	1.02357	1.01006	1.0694	1.05741	0.996899	1.03792
2016-01-24 08:00:00	0.670256	0.660761	0.739792	0.702555	0.643627	0.685036
2016-01-24 09:00:00	1.10217	1.08598	1.12985	1.13774	1.07519	1.11645
2016-01-24 10:00:00	0.870357	0.849065	0.902465	0.901653	0.843239	0.884832
2016-01-24 11:00:00	1.08168	1.06018	1.11386	1.11324	1.05419	1.09584
2016-01-24 12:00:00	1.16057	1.13977	1.16767	1.19896	1.13301	1.17471
2016-01-24 13:00:00	0.972626	0.935787	1.02098	0.994924	0.946316	0.986978
2016-01-24 14:00:00	0.752109	0.737248	0.819389	0.790851	0.72523	0.76677
2016-01-24 15:00:00	0.571615	0.565393	0.635375	0.590611	0.546158	0.586715
2016-01-24 16:00:00	0.733036	0.72312	0.796376	0.766553	0.705726	0.747941
2016-01-24 17:00:00	0.575601	0.572539	0.62115	0.612206	0.548633	0.590902
2016-01-24 18:00:00	0.617683	0.613764	0.686597	0.644854	0.590558	0.632721
2016-01-24 19:00:00	0.537016	0.520361	0.609125	0.567903	0.51142	0.552314
2016-01-24 20:00:00	1.11971	1.085	1.14114	1.17014	1.09364	1.13391
2016-01-24 21:00:00	2.37215	2.35977	2.26917	2.424	2.3552	2.38972
2016-01-24 22:00:00	1.58333	1.55775	1.56319	1.60645	1.56074	1.59837
2016-01-24 23:00:00	0.813723	0.804928	0.857292	0.853069	0.786463	0.828209
2016-01-25	0.64102	0.635137	0.710697	0.685725	0.616992	0.65606
2016-01-25 01:00:00	0.97243	0.960568	1.02272	1.01831	0.947371	0.986881
2016-01-25 02:00:00	0.672774	0.664052	0.733454	0.714605	0.648069	0.687769
2016-01-25 03:00:00	0.613158	0.603563	0.692711	0.64537	0.588632	0.628444
2016-01-25 04:00:00	0.62056	0.611437	0.691231	0.660375	0.595623	0.635699
2016-01-25 05:00:00	0.882881	0.870318	0.915362	0.926777	0.856774	0.897358
2016-01-25 06:00:00	0.801973	0.788218	0.842924	0.845489	0.775691	0.816566
2016-01-25 07:00:00	0.80547	0.789099	0.844583	0.849514	0.779045	0.820083
2016-01-25 08:00:00	0.805927	0.787707	0.842226	0.849223	0.779371	0.820538
2016-01-25 09:00:00	0.77819	0.758658	0.821806	0.821715	0.751617	0.792855
2016-01-25 10:00:00	1.42193	1.40315	1.37912	1.47328	1.39591	1.43638
2016-01-25 11:00:00	1.2025	1.16934	1.19098	1.2363	1.17704	1.2167
2016-01-25 12:00:00	1.28723	1.21802	1.25388	1.29577	1.26104	1.30146
2016-01-25 13:00:00	0.986473	0.939814	1.03662	0.996227	0.95972	1.00076
2016-01-25 14:00:00	0.684686	0.663183	0.735238	0.716359	0.658863	0.699563
2016-01-25 15:00:00	0.830549	0.807606	0.84132	0.858821	0.804933	0.845115
2016-01-25 16:00:00	1.18853	1.1669	1.3077	1.21648	1.16387	1.20276
2016-01-25 17:00:00	0.351955	0.36355	0.493867	0.38745	0.329235	0.367778
2016-01-25 18:00:00	0.677259	0.667335	0.718783	0.654017	0.652817	0.693815
2016-01-25 19:00:00	0.953153	0.931678	0.976206	0.949752	0.928598	0.969324
2016-01-25 20:00:00	0.790066	0.781025	0.814062	0.765628	0.764272	0.805981
2016-01-25 21:00:00	1.00641	0.98515	0.990505	1.06032	0.980382	1.02036
2016-01-25 22:00:00	1.9582	1.92005	1.90178	1.97208	1.93915	1.97369
2016-01-25 23:00:00	1.13508	1.11157	1.13821	1.17739	1.10935	1.14899
2016-01-26	1.69508	1.68231	1.71115	1.72456	1.67358	1.7101
2016-01-26 01:00:00	2.18723	2.15432	2.0904	2.15714	2.17051	2.20655
2016-01-26 02:00:00	1.48313	1.45713	1.41447	1.48552	1.4603	1.49814
2016-01-26 03:00:00	1.27819	1.25835	1.30398	1.31617	1.25411	1.29251
2016-01-26 04:00:00	0.812867	0.799771	0.852583	0.875076	0.788083	0.827506
2016-01-26 05:00:00	0.707635	0.707778	0.768461	0.754375	0.68206	0.722305
2016-01-26 06:00:00	0.742161	0.734001	0.794822	0.784904	0.716604	0.756872
2016-01-26 07:00:00	0.810731	0.801869	0.848536	0.846621	0.784581	0.825179
2016-01-26 08:00:00	0.749373	0.736735	0.800902	0.786084	0.72364	0.764088
2016-01-26 09:00:00	0.987929	0.970764	1.04154	1.01992	0.961235	1.00207
2016-01-26 10:00:00	1.03461	1.01615	1.06935	1.06551	1.00767	1.04881
2016-01-26 11:00:00	0.950207	0.929909	0.973522	0.976206	0.923999	0.96505
2016-01-26 12:00:00	1.41714	1.35171	1.33984	1.40164	1.39237	1.43178
2016-01-26 13:00:00	0.651034	0.632111	0.741349	0.68821	0.625482	0.66603
2016-01-26 14:00:00	0.317094	0.32865	0.500348	0.358043	0.293111	0.333167
2016-01-26 15:00:00	0.462785	0.45984	0.585772	0.50855	0.437965	0.478337
2016-01-26 16:00:00	0.654271	0.646845	0.742174	0.691061	0.627971	0.668997
2016-01-26 17:00:00	0.659377	0.641199	0.767306	0.691851	0.634523	0.674117
2016-01-26 18:00:00	0.562736	0.566441	0.65851	0.597379	0.537187	0.5775
2016-01-26 19:00:00	0.851432	0.837094	0.915264	0.892434	0.8247	0.86581
2016-01-26 20:00:00	1.32684	1.29347	1.32375	1.36623	1.30137	1.34109
2016-01-26 21:00:00	1.31889	1.28715	1.30965	1.35453	1.29291	1.33299
2016-01-26 22:00:00	1.47939	1.44999	1.48565	1.52272	1.4547	1.49378
2016-01-26 23:00:00	1.48112	1.45607	1.49824	1.51291	1.45688	1.49541
2016-01-27	1.01591	1.00117	1.05961	1.04171	0.992521	1.03027
2016-01-27 01:00:00	0.923736	0.920299	0.946081	0.94029	0.899456	0.938195
2016-01-27 02:00:00	0.823187	0.818315	0.842797	0.845037	0.798467	0.838554
2016-01-27 03:00:00	1.1474	1.14218	1.07281	1.13277	1.12236	1.1629
2016-01-27 04:00:00	0.711171	0.707927	0.786395	0.744947	0.686417	0.725884
2016-01-27 05:00:00	0.589356	0.593848	0.659083	0.628999	0.563762	0.604385
2016-01-27 06:00:00	0.746283	0.740162	0.803589	0.78077	0.720425	0.76138
2016-01-27 07:00:00	0.758468	0.748959	0.790799	0.781788	0.731817	0.77352
2016-01-27 08:00:00	0.730199	0.714711	0.790211	0.769749	0.703843	0.745091
2016-01-27 09:00:00	0.81414	0.796904	0.854221	0.861334	0.78708	0.828617
2016-01-27 10:00:00	0.991145	0.967301	1.0302	1.03715	0.963926	1.00543
2016-01-27 11:00:00	0.706149	0.686022	0.756437	0.748388	0.678823	0.720932
2016-01-27 12:00:00	1.05364	1.00198	1.12596	1.05351	1.0274	1.06788
2016-01-27 13:00:00	0.782251	0.752583	0.859294	0.809912	0.755581	0.79701
2016-01-27 14:00:00	0.425209	0.421716	0.577755	0.471195	0.39874	0.440792
2016-01-27 15:00:00	0.425626	0.414598	0.56594	0.476196	0.400212	0.441383
2016-01-27 16:00:00	0.242941	0.253566	0.421704	0.291145	0.219125	0.259412
2016-01-27 17:00:00	0.246341	0.253033	0.435285	0.298701	0.223406	0.262896
2016-01-27 18:00:00	0.483935	0.482619	0.622624	0.536873	0.458661	0.499186
2016-01-27 19:00:00	0.16822	0.191291	0.385646	0.234573	0.146757	0.185186
2016-01-27 20:00:00	0.187178	0.21147	0.412352	0.247945	0.165061	0.20389
2016-01-27 21:00:00	0.737323	0.726704	0.795621	0.796056	0.710632	0.751781
2016-01-27 22:00:00	0.94543	0.933288	0.996723	1.00564	0.918534	0.959423
2016-01-27 23:00:00	0.896436	0.886657	0.915164	0.958358	0.86958	0.910483
2016-01-28	2.71643	2.68863	2.60163	2.73555	2.69898	2.73561
2016-01-28 01:00:00	1.95925	1.94344	1.89603	1.98378	1.93904	1.97539
2016-01-28 02:00:00	1.44063	1.42217	1.37393	1.42662	1.41845	1.45625
2016-01-28 03:00:00	1.17604	1.16407	1.11323	1.19212	1.15213	1.19165
2016-01-28 04:00:00	0.94835	0.935694	0.896882	0.939211	0.923963	0.963851
2016-01-28 05:00:00	0.602323	0.602686	0.676432	0.650336	0.576951	0.617293
2016-01-28 06:00:00	0.702309	0.693355	0.758767	0.750685	0.676797	0.717161
2016-01-28 07:00:00	0.953925	0.94699	0.961552	1.00437	0.927414	0.968084
2016-01-28 08:00:00	0.822886	0.806037	0.850653	0.871621	0.796965	0.837447
2016-01-28 09:00:00	0.695997	0.681775	0.759403	0.743135	0.669886	0.710722
2016-01-28 10:00:00	1.26624	1.25331	1.22622	1.32418	1.24013	1.2804
2016-01-28 11:00:00	0.929397	0.912294	0.956355	0.969172	0.902393	0.943707
2016-01-28 12:00:00	1.08157	1.04109	1.14712	1.08602	1.0561	1.09565
2016-01-28 13:00:00	0.741891	0.729563	0.81457	0.77621	0.716129	0.756416
2016-01-28 14:00:00	0.451231	0.457429	0.554594	0.467395	0.425976	0.466499
2016-01-28 15:00:00	0.527332	0.531136	0.608649	0.554997	0.501608	0.542455
2016-01-28 16:00:00	0.449565	0.458029	0.538374	0.47219	0.425033	0.464915
2016-01-28 17:00:00	0.261229	0.280541	0.449111	0.293185	0.239159	0.277463
2016-01-28 18:00:00	0.87737	0.878836	0.921218	0.90443	0.850796	0.891573
2016-01-28 19:00:00	0.49455	0.499871	0.566479	0.529233	0.470581	0.509819
2016-01-28 20:00:00	0.541701	0.540979	0.597269	0.584427	0.516832	0.556808
2016-01-28 21:00:00	0.840369	0.828071	0.860377	0.875444	0.81328	0.854419
2016-01-28 22:00:00	0.806366	0.803039	0.873004	0.851591	0.779916	0.820642
2016-01-28 23:00:00	1.3409	1.33056	1.33701	1.38324	1.31635	1.35507
2016-01-29	0.999326	0.99247	1.02253	1.03649	0.976543	1.01407
2016-01-29 01:00:00	1.38734	1.39488	1.38986	1.43518	1.36465	1.40232
2016-01-29 02:00:00	0.955026	0.943396	0.972268	1.02384	0.930621	0.969437
2016-01-29 03:00:00	0.732727	0.733163	0.749728	0.75258	0.707929	0.747362
2016-01-29 04:00:00	0.789245	0.79434	0.815156	0.820691	0.763609	0.803668
2016-01-29 05:00:00	0.792967	0.79081	0.83104	0.843432	0.767367	0.807631
2016-01-29 06:00:00	0.63791	0.64237	0.704811	0.680014	0.612105	0.652728
2016-01-29 07:00:00	0.927744	0.921599	0.96172	0.976427	0.901367	0.94215
2016-01-29 08:00:00	0.622881	0.627532	0.677938	0.665494	0.596535	0.637703
2016-01-29 09:00:00	1.0262	1.01807	1.07127	1.07679	0.999433	1.04046
2016-01-29 10:00:00	0.92081	0.91118	0.947921	0.962931	0.893558	0.935043
2016-01-29 11:00:00	0.917338	0.90514	0.956869	0.961881	0.890024	0.931586
2016-01-29 12:00:00	1.00235	0.967547	1.06183	1.01955	0.97647	1.01666
2016-01-29 13:00:00	1.36309	1.27387	1.35593	1.3313	1.33486	1.37591
2016-01-29 14:00:00	0.933869	0.903531	0.93172	0.953873	0.907159	0.949405
2016-01-29 15:00:00	0.382148	0.389664	0.551647	0.415733	0.357566	0.397878
2016-01-29 16:00:00	0.722298	0.711196	0.777108	0.748695	0.696571	0.736692
2016-01-29 17:00:00	0.825825	0.802259	0.916829	0.855501	0.800256	0.840211
2016-01-29 18:00:00	0.61659	0.605966	0.656015	0.653957	0.590608	0.631491
2016-01-29 19:00:00	0.880075	0.862428	0.929041	0.926494	0.853952	0.894385
2016-01-29 20:00:00	1.3248	1.30306	1.30353	1.38131	1.29992	1.33896
2016-01-29 21:00:00	1.18181	1.16483	1.19088	1.23626	1.1559	1.19572
2016-01-29 22:00:00	1.46037	1.44875	1.4424	1.51961	1.43667	1.47509
2016-01-29 23:00:00	1.32495	1.31028	1.31813	1.38262	1.30033	1.33917
2016-01-30	0.942493	0.935669	0.956827	0.988669	0.918448	0.956898
2016-01-30 01:00:00	0.959064	0.955953	0.987086	1.01232	0.934666	0.973424
2016-01-30 02:00:00	0.568591	0.573344	0.659818	0.607063	0.54532	0.58423
2016-01-30 03:00:00	0.935758	0.92579	0.958758	0.970304	0.911594	0.950371
2016-01-30 04:00:00	0.894963	0.89068	0.924546	0.938904	0.86974	0.909267
2016-01-30 05:00:00	0.844472	0.836221	0.879315	0.893362	0.819367	0.85899
2016-01-30 06:00:00	0.794055	0.784501	0.832092	0.838755	0.768767	0.808636
2016-01-30 07:00:00	1.00215	0.998865	1.04562	1.04859	0.976192	1.01627
2016-01-30 08:00:00	0.912564	0.89981	0.918654	0.958382	0.886992	0.926887
2016-01-30 09:00:00	0.740715	0.732931	0.792157	0.780623	0.714631	0.755163
2016-01-30 10:00:00	1.07918	1.06284	1.10134	1.13044	1.05319	1.09336
2016-01-30 11:00:00	0.938052	0.922246	0.957291	0.983783	0.911485	0.952189
2016-01-30 12:00:00	2.10115	2.01463	2.03852	2.10427	2.08114	2.11728
2016-01-30 13:00:00	0.91472	0.894277	0.913816	0.95401	0.888527	0.929023
2016-01-30 14:00:00	0.852605	0.838545	0.890879	0.894758	0.826244	0.866805
2016-01-30 15:00:00	0.522723	0.511911	0.602543	0.563086	0.498138	0.537922
2016-01-30 16:00:00	0.471188	0.467992	0.567904	0.508839	0.446348	0.486427
2016-01-30 17:00:00	0.641593	0.627305	0.716597	0.682424	0.61617	0.656358
2016-01-30 18:00:00	0.304644	0.319396	0.439845	0.337602	0.281351	0.320944
2016-01-30 19:00:00	0.301231	0.315069	0.46088	0.33684	0.278241	0.317787
2016-01-30 20:00:00	0.324281	0.340734	0.463526	0.36163	0.300355	0.340423
2016-01-30 21:00:00	0.525045	0.528891	0.600229	0.57923	0.498965	0.540057
2016-01-30 22:00:00	1.17561	1.15789	1.20934	1.21731	1.1498	1.18941
2016-01-30 23:00:00	1.87699	1.8082	1.74311	1.89873	1.85515	1.89208
2016-01-31	1.31852	1.31111	1.31053	1.36595	1.29539	1.33286
2016-01-31 01:00:00	1.07128	1.0684	1.05162	1.11506	1.04658	1.08537
2016-01-31 02:00:00	1.25141	1.23561	1.26942	1.2696	1.22814	1.26564
2016-01-31 03:00:00	0.803134	0.802358	0.816929	0.84069	0.778254	0.818353
2016-01-31 04:00:00	0.597655	0.609007	0.647929	0.63583	0.573188	0.612458
2016-01-31 05:00:00	0.503217	0.51435	0.598807	0.55614	0.479063	0.518595
2016-01-31 06:00:00	0.472641	0.484451	0.577466	0.528028	0.448406	0.488153
2016-01-31 07:00:00	0.582025	0.588787	0.654046	0.637149	0.556632	0.597039
2016-01-31 08:00:00	0.519896	0.52487	0.607978	0.576181	0.494926	0.535219
2016-01-31 09:00:00	0.62574	0.628761	0.684474	0.679215	0.599644	0.64051
2016-01-31 10:00:00	0.737283	0.729618	0.793204	0.788582	0.711375	0.752289
2016-01-31 11:00:00	1.02359	1.00812	1.08981	1.06615	0.997572	1.03825
2016-01-31 12:00:00	0.990533	0.976595	1.03463	1.04377	0.963966	1.00493
2016-01-31 13:00:00	0.847413	0.825894	0.885515	0.884501	0.822243	0.861826
2016-01-31 14:00:00	1.22324	1.16978	1.23559	1.22081	1.19704	1.23724
2016-01-31 15:00:00	0.680727	0.66428	0.745924	0.693983	0.656054	0.695594
2016-01-31 16:00:00	1.21098	1.16961	1.1534	1.1532	1.18429	1.22598
2016-01-31 17:00:00	0.976152	0.945218	0.989177	0.980711	0.950437	0.992042
2016-01-31 18:00:00	0.449581	0.464931	0.572069	0.495382	0.424344	0.464942
2016-01-31 19:00:00	2.91468	2.8673	2.83309	2.91463	2.8979	2.93438
2016-01-31 20:00:00	2.04277	1.99257	1.99553	2.07114	2.02181	2.05853
2016-01-31 21:00:00	1.40016	1.37157	1.4085	1.4535	1.37561	1.41432
2016-01-31 22:00:00	2.01131	1.95621	1.96533	2.02889	1.99031	2.02675
2016-01-31 23:00:00	1.43144	1.39171	1.449	1.46016	1.4071	1.44554
2016-02-01	1.3813	1.38253	1.38019	1.373	1.35734	1.39578
2016-02-01 01:00:00	2.25673	2.284	2.15557	2.17616	2.23729	2.27612
2016-02-01 02:00:00	2.04129	2.0201	1.91064	1.94494	2.01916	2.05476
2016-02-01 03:00:00	1.03208	1.01635	0.96709	1.05791	1.00659	1.04603
2016-02-01 04:00:00	0.335019	0.35975	0.496174	0.392011	0.31111	0.35105
2016-02-01 05:00:00	0.345159	0.368119	0.502522	0.40145	0.32082	0.361128
2016-02-01 06:00:00	0.484257	0.494435	0.591064	0.533268	0.458924	0.499769
2016-02-01 07:00:00	0.590388	0.598066	0.636079	0.624109	0.563975	0.605315
2016-02-01 08:00:00	0.73704	0.736349	0.73724	0.75758	0.709897	0.751524
2016-02-01 09:00:00	0.759817	0.750001	0.809612	0.795855	0.733085	0.774504
2016-02-01 10:00:00	0.885524	0.879819	0.913051	0.915398	0.857534	0.899693
2016-02-01 11:00:00	0.727697	0.715535	0.786127	0.754736	0.700317	0.742277
2016-02-01 12:00:00	0.898109	0.87696	0.978782	0.904182	0.872383	0.912521
2016-02-01 13:00:00	0.389293	0.403985	0.548739	0.435635	0.365041	0.404966
2016-02-01 14:00:00	0.328964	0.338108	0.488309	0.381605	0.306077	0.345116
2016-02-01 15:00:00	0.240202	0.262208	0.444706	0.291147	0.217235	0.256605
2016-02-01 16:00:00	0.372131	0.385796	0.516747	0.417932	0.347443	0.387922
2016-02-01 17:00:00	0.247638	0.275667	0.4445	0.305116	0.223902	0.263984
2016-02-01 18:00:00	0.322999	0.349931	0.487526	0.371823	0.298032	0.33892
2016-02-01 19:00:00	0.863154	0.863728	0.91457	0.869291	0.837237	0.877965
2016-02-01 20:00:00	1.68359	1.676	1.60868	1.62594	1.66143	1.69976
2016-02-01 21:00:00	1.73913	1.72693	1.74445	1.69317	1.71828	1.75574
2016-02-01 22:00:00	3.69544	3.55661	3.56035	3.6541	3.67885	3.71941
2016-02-01 23:00:00	2.44715	2.36553	2.42116	2.40298	2.42913	2.46423
2016-02-02	0.764743	0.755963	0.789142	0.77859	0.739406	0.779552
2016-02-02 01:00:00	1.20038	1.18786	1.18823	1.18406	1.17591	1.21464
2016-02-02 02:00:00	0.964281	0.961075	0.925131	0.944558	0.938946	0.979216
2016-02-02 03:00:00	1.32933	1.32706	1.28287	1.27392	1.30527	1.34512
2016-02-02 04:00:00	0.903665	0.886461	0.896543	0.893055	0.878067	0.919798
2016-02-02 05:00:00	0.785955	0.757098	0.863347	0.794108	0.760338	0.800821
2016-02-02 06:00:00	0.581487	0.574542	0.670289	0.61905	0.555886	0.596749
2016-02-02 07:00:00	0.457145	0.4564	0.584492	0.490397	0.431725	0.472642
2016-02-02 08:00:00	0.789857	0.781072	0.832762	0.812057	0.76299	0.804292
2016-02-02 09:00:00	0.69074	0.674953	0.731884	0.706576	0.664787	0.705607
2016-02-02 10:00:00	1.23199	1.19192	1.18846	1.2188	1.20411	1.24594
2016-02-02 11:00:00	0.794924	0.758681	0.827288	0.77875	0.768728	0.809271
2016-02-02 12:00:00	1.30802	1.22978	1.30112	1.25125	1.28363	1.32252
2016-02-02 13:00:00	0.938182	0.907661	0.954227	0.914032	0.912964	0.952338
2016-02-02 14:00:00	0.325712	0.321836	0.49395	0.33346	0.304462	0.341511
2016-02-02 15:00:00	0.305229	0.310075	0.480985	0.317415	0.283797	0.321031
2016-02-02 16:00:00	0.239816	0.26384	0.442433	0.258442	0.219571	0.255887
2016-02-02 17:00:00	0.640699	0.623882	0.670696	0.624834	0.617291	0.655062
2016-02-02 18:00:00	0.46208	0.467361	0.524852	0.467631	0.439484	0.477097
2016-02-02 19:00:00	0.170531	0.206974	0.352394	0.202245	0.150786	0.187073
2016-02-02 20:00:00	0.465713	0.471128	0.5346	0.478411	0.442685	0.480745
2016-02-02 21:00:00	0.713723	0.713684	0.778548	0.711731	0.687656	0.727816
2016-02-02 22:00:00	0.502526	0.521291	0.576518	0.516897	0.476956	0.517322
2016-02-02 23:00:00	0.844079	0.862182	0.884846	0.861632	0.817801	0.85815
2016-02-03	0.779311	0.795192	0.809648	0.78046	0.755203	0.793889
2016-02-03 01:00:00	1.06738	1.07729	1.02949	1.05675	1.04211	1.08262
2016-02-03 02:00:00	0.769135	0.778074	0.791169	0.770663	0.744684	0.784111
2016-02-03 03:00:00	0.855882	0.850344	0.846207	0.84342	0.829639	0.870688
2016-02-03 04:00:00	0.933186	0.925904	0.962626	0.919957	0.906407	0.947305
2016-02-03 05:00:00	0.783341	0.769483	0.82501	0.793143	0.756674	0.797916
2016-02-03 06:00:00	0.683171	0.674013	0.740934	0.696322	0.656688	0.697966
2016-02-03 07:00:00	0.751653	0.741459	0.802315	0.761099	0.725831	0.766272
2016-02-03 08:00:00	0.609757	0.604171	0.663627	0.617377	0.584672	0.624562
2016-02-03 09:00:00	0.980043	0.953815	1.02146	0.988951	0.952149	0.994208
2016-02-03 10:00:00	0.903283	0.882236	0.915894	0.919957	0.875199	0.917553
2016-02-03 11:00:00	0.694537	0.681358	0.743544	0.71763	0.667174	0.709217
2016-02-03 12:00:00	1.17446	1.13172	1.18539	1.15685	1.14893	1.1886
2016-02-03 13:00:00	0.707599	0.702502	0.789039	0.727027	0.681508	0.722311
2016-02-03 14:00:00	0.631548	0.627354	0.69816	0.657418	0.605597	0.646467
2016-02-03 15:00:00	0.617896	0.615721	0.681951	0.652168	0.591641	0.632742
2016-02-03 16:00:00	0.641096	0.642345	0.698866	0.675521	0.61453	0.655828
2016-02-03 17:00:00	0.64804	0.652491	0.710794	0.684724	0.621441	0.662717
2016-02-03 18:00:00	0.594743	0.602632	0.653963	0.626366	0.568498	0.609614
2016-02-03 19:00:00	0.674467	0.683353	0.731676	0.693824	0.648129	0.689478
2016-02-03 20:00:00	0.860325	0.867699	0.896455	0.874381	0.833559	0.874647
2016-02-03 21:00:00	0.747096	0.761956	0.800944	0.774785	0.720068	0.761284
2016-02-03 22:00:00	0.899637	0.913562	0.896841	0.919713	0.872253	0.913591
2016-02-03 23:00:00	0.92927	0.945113	0.978879	0.952854	0.902161	0.94321
2016-02-04	0.668244	0.677808	0.716845	0.706236	0.643841	0.6833
2016-02-04 01:00:00	0.564924	0.57643	0.642556	0.609691	0.540851	0.580231
2016-02-04 02:00:00	0.398141	0.417057	0.538666	0.452075	0.375238	0.413995
2016-02-04 03:00:00	0.476326	0.489083	0.555238	0.519059	0.451911	0.491945
2016-02-04 04:00:00	0.446786	0.454975	0.561461	0.494726	0.423126	0.462504
2016-02-04 05:00:00	0.39737	0.404745	0.541724	0.443624	0.374803	0.413223
2016-02-04 06:00:00	0.376958	0.380223	0.539674	0.40794	0.354453	0.392817
2016-02-04 07:00:00	0.362675	0.369258	0.536392	0.376218	0.340084	0.378368
2016-02-04 08:00:00	0.447556	0.447357	0.590542	0.460796	0.422931	0.462921
2016-02-04 09:00:00	0.648137	0.635872	0.715562	0.636466	0.622793	0.663262
2016-02-04 10:00:00	1.32214	1.31264	1.31827	1.29486	1.29589	1.33662
2016-02-04 11:00:00	0.672038	0.655635	0.742072	0.677209	0.645281	0.686439
2016-02-04 12:00:00	1.51075	1.43352	1.39913	1.39753	1.48576	1.52679
2016-02-04 13:00:00	0.927927	0.899712	0.887373	0.874573	0.903036	0.943635
2016-02-04 14:00:00	0.278165	0.279981	0.455445	0.31078	0.25594	0.294437
2016-02-04 15:00:00	0.23718	0.25009	0.435626	0.291424	0.214807	0.2537
2016-02-04 16:00:00	0.223805	0.239765	0.425043	0.281062	0.201349	0.240393
2016-02-04 17:00:00	0.176028	0.20041	0.399533	0.239811	0.153752	0.192858
2016-02-04 18:00:00	0.191285	0.22374	0.403685	0.25354	0.168194	0.207917
2016-02-04 19:00:00	0.348191	0.373922	0.496546	0.388379	0.323781	0.363977
2016-02-04 20:00:00	0.545777	0.567725	0.624015	0.579925	0.519657	0.560564
2016-02-04 21:00:00	0.876873	0.892671	0.896287	0.902873	0.849763	0.890898
2016-02-04 22:00:00	0.889411	0.911143	0.901759	0.904611	0.862072	0.903181
2016-02-04 23:00:00	1.04806	1.06954	1.10088	1.0646	1.02199	1.06177
2016-02-05	1.37776	1.39163	1.391	1.39637	1.35382	1.39277
2016-02-05 01:00:00	1.11147	1.12166	1.14662	1.13695	1.08637	1.12647
2016-02-05 02:00:00	0.943137	0.931707	0.993722	0.971323	0.917865	0.957821
2016-02-05 03:00:00	0.850872	0.842594	0.8503	0.862467	0.825008	0.865752
2016-02-05 04:00:00	0.963423	0.956385	0.943438	0.973953	0.93753	0.97777
2016-02-05 05:00:00	1.00689	0.978152	0.954265	1.05344	0.979925	1.02113
2016-02-05 06:00:00	0.688088	0.682584	0.752597	0.729146	0.660825	0.702842
2016-02-05 07:00:00	0.577251	0.567044	0.660797	0.616099	0.550187	0.592365
2016-02-05 08:00:00	0.772166	0.76366	0.822321	0.81224	0.744362	0.786751
2016-02-05 09:00:00	0.714292	0.698835	0.776477	0.750653	0.687228	0.729149
2016-02-05 10:00:00	1.05832	1.05218	1.06427	1.08835	1.03079	1.0724
2016-02-05 11:00:00	0.756814	0.740448	0.806439	0.788512	0.730192	0.771515
2016-02-05 12:00:00	1.1079	1.07976	1.1331	1.10572	1.08275	1.12205
2016-02-05 13:00:00	0.715183	0.701997	0.772525	0.720427	0.689887	0.729758
2016-02-05 14:00:00	0.542589	0.537682	0.66021	0.55312	0.51689	0.55745
2016-02-05 15:00:00	0.711385	0.703459	0.762836	0.723905	0.685009	0.725854
2016-02-05 16:00:00	0.770413	0.75901	0.809179	0.789143	0.743813	0.784851
2016-02-05 17:00:00	0.796662	0.791302	0.826713	0.816092	0.769707	0.810914
2016-02-05 18:00:00	0.694847	0.696506	0.761818	0.717756	0.668508	0.709481
2016-02-05 19:00:00	0.698718	0.699081	0.754802	0.720145	0.672576	0.713747
2016-02-05 20:00:00	0.642757	0.652211	0.71686	0.670401	0.617352	0.657748
2016-02-05 21:00:00	0.759696	0.774298	0.830125	0.782299	0.73324	0.773916
2016-02-05 22:00:00	1.37745	1.4022	1.33879	1.39878	1.35305	1.39139
2016-02-05 23:00:00	1.30343	1.30606	1.2677	1.30487	1.27904	1.31724
2016-02-06	1.36011	1.37937	1.36013	1.35663	1.33717	1.37458
2016-02-06 01:00:00	1.55171	1.58465	1.52208	1.55262	1.52907	1.56632
2016-02-06 02:00:00	1.94927	1.96519	1.75911	1.884	1.92964	1.96603
2016-02-06 03:00:00	1.61676	1.60651	1.57978	1.56643	1.59083	1.62838
2016-02-06 04:00:00	0.574068	0.57334	0.646057	0.612155	0.549203	0.589321
2016-02-06 05:00:00	0.745401	0.73917	0.80976	0.781505	0.71909	0.760067
2016-02-06 06:00:00	0.732304	0.722119	0.782745	0.765928	0.706423	0.747106
2016-02-06 07:00:00	1.02691	1.02638	1.0919	1.05786	1.00031	1.0412
2016-02-06 08:00:00	0.769992	0.75522	0.822098	0.799608	0.743075	0.784539
2016-02-06 09:00:00	0.786189	0.77391	0.827176	0.814443	0.75931	0.800781
2016-02-06 10:00:00	1.00158	0.98931	1.05811	1.02692	0.97416	1.01584
2016-02-06 11:00:00	0.785696	0.765181	0.825347	0.807944	0.758316	0.800202
2016-02-06 12:00:00	1.23751	1.21288	1.23047	1.24207	1.21253	1.25205
2016-02-06 13:00:00	1.28434	1.28149	1.28425	1.2902	1.26025	1.29914
2016-02-06 14:00:00	0.384589	0.374446	0.531636	0.418917	0.359979	0.4005
2016-02-06 15:00:00	0.637363	0.629071	0.706248	0.666491	0.611547	0.652292
2016-02-06 16:00:00	0.355303	0.355045	0.455437	0.382548	0.330387	0.371434
2016-02-06 17:00:00	0.251629	0.262552	0.432329	0.27923	0.228317	0.26814
2016-02-06 18:00:00	0.325117	0.339821	0.476272	0.367406	0.300362	0.341066
2016-02-06 19:00:00	0.230613	0.249602	0.411665	0.275768	0.207029	0.247145
2016-02-06 20:00:00	0.381501	0.395555	0.519649	0.421223	0.356316	0.397202
2016-02-06 21:00:00	0.416899	0.441073	0.546252	0.455261	0.390373	0.432207
2016-02-06 22:00:00	0.658092	0.670937	0.734233	0.699881	0.631004	0.672626
2016-02-06 23:00:00	0.706721	0.718128	0.762907	0.743043	0.679711	0.721097
2016-02-07	0.876894	0.873155	0.919048	0.908337	0.852063	0.891473
2016-02-07 01:00:00	0.825045	0.821374	0.853773	0.857193	0.799896	0.839675
2016-02-07 02:00:00	0.652683	0.647432	0.714594	0.689556	0.627993	0.667798
2016-02-07 03:00:00	0.609134	0.606311	0.65208	0.638213	0.583895	0.624355
2016-02-07 04:00:00	0.723575	0.722483	0.791798	0.759897	0.697558	0.738344
2016-02-07 05:00:00	0.796265	0.789208	0.830425	0.82769	0.770499	0.811168
2016-02-07 06:00:00	1.01549	1.01409	1.05228	1.04041	0.990048	1.03043
2016-02-07 07:00:00	0.747958	0.734047	0.802464	0.775096	0.722121	0.762837
2016-02-07 08:00:00	0.64629	0.627102	0.695167	0.674393	0.620896	0.661259
2016-02-07 09:00:00	0.953658	0.947669	0.985661	0.976389	0.928828	0.968012
2016-02-07 10:00:00	0.632946	0.616234	0.674227	0.651837	0.608156	0.647879
2016-02-07 11:00:00	1.06236	1.05048	1.09105	1.06846	1.03607	1.07636
2016-02-07 12:00:00	0.99397	0.972795	1.04186	0.991368	0.967003	1.00813
2016-02-07 13:00:00	0.763841	0.727056	0.805241	0.755052	0.737803	0.778398
2016-02-07 14:00:00	0.54712	0.527001	0.679763	0.550191	0.522548	0.562039
2016-02-07 15:00:00	0.412386	0.402411	0.550252	0.431896	0.388647	0.428168
2016-02-07 16:00:00	0.454312	0.440892	0.590602	0.46072	0.430527	0.469927
2016-02-07 17:00:00	0.138081	0.136112	0.375558	0.162886	0.116474	0.155515
2016-02-07 18:00:00	0.0912344	0.103921	0.353405	0.113273	0.0705011	0.108582
2016-02-07 19:00:00	0.369566	0.376837	0.515303	0.38778	0.34599	0.385618
2016-02-07 20:00:00	0.813488	0.795395	0.851253	0.816142	0.788613	0.82834
2016-02-07 21:00:00	1.11039	1.12166	1.07972	1.12946	1.08516	1.12463
2016-02-07 22:00:00	1.4183	1.4357	1.4076	1.44678	1.39487	1.43239
2016-02-07 23:00:00	1.08413	1.09001	1.08734	1.09824	1.05817	1.09794
2016-02-08	1.62235	1.66059	1.60011	1.63177	1.60158	1.6373
2016-02-08 01:00:00	2.85442	2.89885	2.7576	2.79999	2.83849	2.87426
2016-02-08 02:00:00	1.516	1.51004	1.44771	1.44863	1.4955	1.53267
2016-02-08 03:00:00	1.2119	1.22617	1.12105	1.1927	1.18886	1.22734
2016-02-08 04:00:00	0.919061	0.910677	0.947641	0.902815	0.894814	0.93504
2016-02-08 05:00:00	0.663588	0.650665	0.716032	0.71333	0.637491	0.678682
2016-02-08 06:00:00	0.665567	0.64494	0.715055	0.724891	0.640025	0.680514
2016-02-08 07:00:00	0.799748	0.793424	0.834986	0.834964	0.773725	0.814209
2016-02-08 08:00:00	0.655753	0.636218	0.718425	0.685333	0.629535	0.67055
2016-02-08 09:00:00	0.770688	0.742316	0.819193	0.781733	0.744311	0.785248
2016-02-08 10:00:00	1.35539	1.33737	1.29283	1.35788	1.3292	1.36955
2016-02-08 11:00:00	0.994647	0.97584	1.02639	1.0085	0.967503	1.0087
2016-02-08 12:00:00	0.704501	0.685481	0.746128	0.720852	0.67888	0.719304
2016-02-08 13:00:00	0.919977	0.886914	1.01127	0.90538	0.892392	0.934512
2016-02-08 14:00:00	1.76029	1.70137	1.71598	1.70644	1.73773	1.77535
2016-02-08 15:00:00	1.95375	1.9416	1.84434	1.93712	1.93368	1.96921
2016-02-08 16:00:00	1.94869	1.95701	1.81456	1.93988	1.92962	1.96473
2016-02-08 17:00:00	1.65491	1.63523	1.59591	1.63291	1.63271	1.66969
2016-02-08 18:00:00	1.27445	1.25404	1.20571	1.28002	1.24931	1.28844
2016-02-08 19:00:00	0.912703	0.899831	0.958818	0.910995	0.886755	0.926668
2016-02-08 20:00:00	1.12534	1.11168	1.12529	1.13429	1.09975	1.13913
2016-02-08 21:00:00	1.7617	1.76072	1.63518	1.75696	1.74014	1.7764
2016-02-08 22:00:00	3.89755	3.90127	3.6015	3.86215	3.88232	3.92284
2016-02-08 23:00:00	3.59553	3.57969	3.18552	3.63687	3.58029	3.62277
2016-02-09	2.42911	2.45255	2.32956	2.34788	2.41076	2.44969
2016-02-09 01:00:00	1.8519	1.93495	1.72362	1.84105	1.83235	1.86822
2016-02-09 02:00:00	1.02751	1.0563	0.963515	1.01694	1.00308	1.04288
2016-02-09 03:00:00	0.83492	0.851569	0.834697	0.818075	0.810073	0.849784
2016-02-09 04:00:00	0.832539	0.849297	0.843399	0.831109	0.807289	0.846926
2016-02-09 05:00:00	0.824481	0.83647	0.850201	0.839608	0.798771	0.839044
2016-02-09 06:00:00	0.85517	0.866182	0.880533	0.874542	0.82959	0.869682
2016-02-09 07:00:00	1.00432	1.0051	0.985283	1.04023	0.978955	1.01847
2016-02-09 08:00:00	0.969023	0.978753	1.00234	0.979821	0.943636	0.983202
2016-02-09 09:00:00	0.766156	0.753232	0.795389	0.759218	0.740926	0.780472
2016-02-09 10:00:00	1.28807	1.26931	1.20453	1.28585	1.26057	1.30233
2016-02-09 11:00:00	1.10038	1.09324	1.11361	1.11609	1.07493	1.1151
2016-02-09 12:00:00	1.12943	1.10688	1.18435	1.10991	1.1046	1.14371
2016-02-09 13:00:00	0.649881	0.646653	0.700838	0.675167	0.625107	0.66479
2016-02-09 14:00:00	0.405522	0.406323	0.530409	0.435695	0.38149	0.421089
2016-02-09 15:00:00	0.498084	0.49812	0.583488	0.529796	0.473383	0.513431
2016-02-09 16:00:00	0.166191	0.186741	0.358079	0.214262	0.144311	0.183236
2016-02-09 17:00:00	0.587729	0.591427	0.639209	0.600223	0.562511	0.602548
2016-02-09 18:00:00	0.476409	0.478769	0.58187	0.50903	0.451823	0.491658
2016-02-09 19:00:00	0.839899	0.847578	0.843944	0.851473	0.813386	0.85426
2016-02-09 20:00:00	1.48149	1.51067	1.46062	1.51618	1.45754	1.49594
2016-02-09 21:00:00	1.55261	1.58554	1.39001	1.57829	1.52843	1.56683
2016-02-09 22:00:00	1.38543	1.40973	1.38303	1.41998	1.36041	1.39953
2016-02-09 23:00:00	1.31432	1.34445	1.28118	1.33039	1.28955	1.328
2016-02-10	1.31354	1.33229	1.37561	1.28729	1.29154	1.32845
2016-02-10 01:00:00	1.76754	1.80846	1.59234	1.70521	1.74486	1.78209
2016-02-10 02:00:00	1.20667	1.22449	1.17811	1.19261	1.18305	1.22203
2016-02-10 03:00:00	0.704866	0.709717	0.682474	0.720197	0.680276	0.71954
2016-02-10 04:00:00	0.704272	0.702962	0.735799	0.735964	0.679603	0.719362
2016-02-10 05:00:00	0.933328	0.937681	0.973853	0.966571	0.907162	0.947716
2016-02-10 06:00:00	0.859212	0.855861	0.888269	0.892915	0.833112	0.873808
2016-02-10 07:00:00	0.791688	0.78484	0.832953	0.815592	0.765544	0.806649
2016-02-10 08:00:00	1.06701	1.06826	1.09508	1.08648	1.04154	1.08184
2016-02-10 09:00:00	0.70742	0.69519	0.758989	0.736222	0.681408	0.722231
2016-02-10 10:00:00	1.27482	1.28307	1.23254	1.29997	1.24843	1.28906
2016-02-10 11:00:00	0.778643	0.767721	0.824346	0.806869	0.75224	0.79323
2016-02-10 12:00:00	1.30327	1.27186	1.30711	1.29247	1.27877	1.31761
2016-02-10 13:00:00	0.489649	0.479971	0.612271	0.528924	0.463742	0.505136
2016-02-10 14:00:00	0.470733	0.464611	0.587799	0.512601	0.444067	0.486116
2016-02-10 15:00:00	0.629113	0.61611	0.69892	0.671165	0.602019	0.644067
2016-02-10 16:00:00	0.602593	0.596225	0.685957	0.643054	0.575254	0.617393
2016-02-10 17:00:00	0.730881	0.718734	0.791886	0.768803	0.703681	0.745587
2016-02-10 18:00:00	0.584071	0.584611	0.682227	0.629202	0.556351	0.59888
2016-02-10 19:00:00	0.577145	0.577301	0.669662	0.626581	0.549731	0.592139
2016-02-10 20:00:00	1.01151	1.0152	1.03151	1.05431	0.983254	1.02537
2016-02-10 21:00:00	0.837802	0.839448	0.870119	0.884349	0.809673	0.852044
2016-02-10 22:00:00	1.01562	1.02458	1.03903	1.05756	0.98742	1.02951
2016-02-10 23:00:00	1.20356	1.21578	1.21378	1.23496	1.1776	1.21801
2016-02-11	1.6295	1.60282	1.46269	1.6282	1.6051	1.64471
2016-02-11 01:00:00	1.53741	1.53593	1.5306	1.54745	1.51424	1.5523
2016-02-11 02:00:00	0.934312	0.939557	0.877416	0.93385	0.907426	0.950439
2016-02-11 03:00:00	0.763809	0.75509	0.763375	0.783557	0.737647	0.778668
2016-02-11 04:00:00	0.692999	0.680155	0.748331	0.740274	0.667282	0.708064
2016-02-11 05:00:00	0.765997	0.755234	0.814544	0.806693	0.739733	0.78084
2016-02-11 06:00:00	0.967687	0.959576	1.00244	1.00183	0.941195	0.982151
2016-02-11 07:00:00	0.731544	0.71729	0.785724	0.769822	0.705325	0.746443
2016-02-11 08:00:00	1.04482	1.03578	1.07467	1.07671	1.01858	1.05925
2016-02-11 09:00:00	0.930489	0.918129	0.958129	0.963255	0.903836	0.944958
2016-02-11 10:00:00	1.25491	1.25342	1.22502	1.28616	1.2288	1.26927
2016-02-11 11:00:00	0.922502	0.903634	0.937217	0.957759	0.896068	0.936999
2016-02-11 12:00:00	1.21482	1.17271	1.22937	1.21582	1.18936	1.22907
2016-02-11 13:00:00	0.699916	0.68932	0.756434	0.724294	0.67357	0.714646
2016-02-11 14:00:00	1.03231	1.01886	1.04847	1.06575	1.00609	1.04662
2016-02-11 15:00:00	0.780119	0.772141	0.807068	0.809234	0.753168	0.794566
2016-02-11 16:00:00	0.754746	0.741121	0.799994	0.790162	0.7279	0.769366
2016-02-11 17:00:00	1.10055	1.10421	1.13658	1.12516	1.07455	1.11453
2016-02-11 18:00:00	0.465987	0.457719	0.584411	0.500595	0.440614	0.48152
2016-02-11 19:00:00	1.1805	1.16531	1.15148	1.15728	1.15279	1.19444
2016-02-11 20:00:00	1.64775	1.63307	1.49325	1.59743	1.6218	1.66081
2016-02-11 21:00:00	1.30005	1.31844	1.26193	1.32507	1.27333	1.31447
2016-02-11 22:00:00	1.49511	1.52157	1.42977	1.52356	1.46958	1.5097
2016-02-11 23:00:00	1.59549	1.57504	1.53832	1.59501	1.57086	1.60977
2016-02-12	1.69762	1.72283	1.65118	1.71267	1.67521	1.7127
2016-02-12 01:00:00	1.76538	1.83236	1.60996	1.73836	1.74169	1.7821
2016-02-12 02:00:00	1.42112	1.44832	1.34165	1.42582	1.39747	1.43583
2016-02-12 03:00:00	1.64041	1.66074	1.48396	1.65673	1.61668	1.65531
2016-02-12 04:00:00	1.57031	1.59538	1.50564	1.59464	1.54555	1.58518
2016-02-12 05:00:00	1.35631	1.36372	1.28538	1.38246	1.32992	1.37085
2016-02-12 06:00:00	1.61531	1.59447	1.56434	1.64736	1.58934	1.63004
2016-02-12 07:00:00	1.33113	1.33761	1.24769	1.35935	1.30315	1.34534
2016-02-12 08:00:00	1.25143	1.25614	1.20145	1.28256	1.223	1.26559
2016-02-12 09:00:00	1.36994	1.37637	1.29379	1.39736	1.3417	1.3842
2016-02-12 10:00:00	1.63707	1.6417	1.47597	1.65814	1.60994	1.65201
2016-02-12 11:00:00	1.35458	1.35194	1.27113	1.38603	1.32642	1.36873
2016-02-12 12:00:00	1.56379	1.51853	1.44515	1.56598	1.53771	1.57815
2016-02-12 13:00:00	1.46088	1.43257	1.46378	1.47058	1.43548	1.47547
2016-02-12 14:00:00	0.698874	0.688173	0.793446	0.741861	0.670706	0.713751
2016-02-12 15:00:00	0.999169	0.985807	1.10073	1.02583	0.972381	1.01408
2016-02-12 16:00:00	1.1205	1.11888	1.14647	1.16395	1.09077	1.13483
2016-02-12 17:00:00	1.15603	1.13262	1.27511	1.17512	1.12938	1.1703
2016-02-12 18:00:00	0.505718	0.503041	0.650066	0.556516	0.478136	0.520964
2016-02-12 19:00:00	0.686498	0.677909	0.823278	0.730218	0.65836	0.701106
2016-02-12 20:00:00	1.0241	1.01712	1.16742	1.05567	0.995234	1.03793
2016-02-12 21:00:00	1.10428	1.08391	1.20902	1.13905	1.07616	1.11823
2016-02-12 22:00:00	1.11233	1.09667	1.16096	1.13319	1.08361	1.12599
2016-02-12 23:00:00	1.16178	1.14115	1.22583	1.19261	1.1336	1.17566
2016-02-13	0.843883	0.818819	0.905055	0.896836	0.816538	0.858524
2016-02-13 01:00:00	1.15098	1.12081	1.2253	1.18865	1.12349	1.16543
2016-02-13 02:00:00	1.07988	1.04534	1.1028	1.07265	1.05316	1.09504
2016-02-13 03:00:00	1.22338	1.22049	1.24889	1.20507	1.19559	1.23898
2016-02-13 04:00:00	0.923891	0.902552	0.941657	0.957063	0.896178	0.938464
2016-02-13 05:00:00	0.973206	0.960789	1.00685	1.01454	0.944615	0.987506
2016-02-13 06:00:00	1.05076	1.0355	1.09501	1.07495	1.02328	1.06572
2016-02-13 07:00:00	1.00472	0.99072	1.06839	1.03364	0.976493	1.01932
2016-02-13 08:00:00	0.813658	0.79239	0.865716	0.850138	0.785375	0.828337
2016-02-13 09:00:00	1.0805	1.06235	1.12893	1.11299	1.05186	1.09478
2016-02-13 10:00:00	1.03702	1.00962	1.0829	1.07189	1.00888	1.05146
2016-02-13 11:00:00	1.06299	1.01436	1.04786	1.10792	1.03477	1.07723
2016-02-13 12:00:00	1.38389	1.36148	1.36221	1.41175	1.35623	1.39837
2016-02-13 13:00:00	1.08455	1.06558	1.09904	1.11758	1.05494	1.09863
2016-02-13 14:00:00	0.728211	0.705725	0.798453	0.762227	0.699991	0.742854
2016-02-13 15:00:00	1.01937	1.00239	1.1106	1.05175	0.991441	1.03385
2016-02-13 16:00:00	1.55685	1.53716	1.48337	1.5744	1.53211	1.57174
2016-02-13 17:00:00	1.92571	1.9108	1.85665	1.9107	1.90183	1.9429
2016-02-13 18:00:00	1.27437	1.24849	1.31941	1.24311	1.24833	1.2907
2016-02-13 19:00:00	1.53567	1.5083	1.51016	1.56492	1.51139	1.55042
2016-02-13 20:00:00	1.51778	1.50485	1.50549	1.54933	1.49322	1.53243
2016-02-13 21:00:00	1.51888	1.50849	1.46304	1.54349	1.49388	1.53375
2016-02-13 22:00:00	2.48725	2.48104	2.29003	2.5073	2.46921	2.50547
2016-02-13 23:00:00	2.39507	2.33946	2.19139	2.39503	2.37344	2.41197
2016-02-14	1.67198	1.65203	1.56178	1.69261	1.64685	1.68712
2016-02-14 01:00:00	2.18323	2.15124	1.98119	2.14452	2.16304	2.20309
2016-02-14 02:00:00	1.98855	1.95989	1.81701	1.97395	1.96759	2.00592
2016-02-14 03:00:00	0.888349	0.865138	0.922626	0.922481	0.860834	0.902854
2016-02-14 04:00:00	1.22393	1.21276	1.21379	1.24854	1.19815	1.23835
2016-02-14 05:00:00	1.28102	1.28744	1.23106	1.29534	1.25567	1.29533
2016-02-14 06:00:00	1.37776	1.37141	1.3007	1.39551	1.35205	1.39222
2016-02-14 07:00:00	1.3721	1.3741	1.29469	1.3942	1.34659	1.38653
2016-02-14 08:00:00	1.31124	1.31357	1.25537	1.3324	1.2856	1.32555
2016-02-14 09:00:00	1.34376	1.34474	1.27803	1.36924	1.31821	1.35814
2016-02-14 10:00:00	1.98237	1.97565	1.86445	1.99925	1.96124	1.99805
2016-02-14 11:00:00	1.45242	1.43805	1.34399	1.45205	1.42682	1.46688
2016-02-14 12:00:00	1.51244	1.48461	1.39282	1.49899	1.48463	1.52683
2016-02-14 13:00:00	1.28424	1.25112	1.23565	1.27209	1.25594	1.2982
2016-02-14 14:00:00	0.987232	0.949509	1.01109	0.987384	0.959475	1.00146
2016-02-14 15:00:00	0.639192	0.620875	0.718959	0.649929	0.611343	0.653962
2016-02-14 16:00:00	0.595141	0.571725	0.69643	0.608839	0.568053	0.610222
2016-02-14 17:00:00	0.586489	0.569402	0.68076	0.600818	0.558684	0.601394
2016-02-14 18:00:00	0.432962	0.421457	0.572001	0.448998	0.407481	0.448454
2016-02-14 19:00:00	0.371866	0.36932	0.523689	0.388588	0.347405	0.387507
2016-02-14 20:00:00	0.222329	0.239107	0.436239	0.234094	0.199916	0.238674
2016-02-14 21:00:00	0.916275	0.883976	0.938304	0.912627	0.888655	0.930741
2016-02-14 22:00:00	1.07529	1.06203	1.0731	1.07623	1.04709	1.08936
2016-02-14 23:00:00	1.24902	1.24582	1.26177	1.27154	1.22176	1.26292
2016-02-15	1.73662	1.74184	1.65014	1.70429	1.71296	1.75205
2016-02-15 01:00:00	1.69745	1.72541	1.53999	1.65764	1.67327	1.71471
2016-02-15 02:00:00	1.52599	1.54653	1.52583	1.49693	1.50256	1.5407
2016-02-15 03:00:00	1.05506	1.07321	1.07354	1.0626	1.03049	1.06919
2016-02-15 04:00:00	1.25664	1.26141	1.22049	1.26454	1.23187	1.27081
2016-02-15 05:00:00	1.15671	1.12842	1.13198	1.16026	1.12922	1.17057
2016-02-15 06:00:00	1.17213	1.13499	1.1517	1.16758	1.14483	1.18609
2016-02-15 07:00:00	1.21714	1.16971	1.1967	1.20168	1.18739	1.23084
2016-02-15 08:00:00	1.35292	1.29138	1.3444	1.34105	1.32333	1.36689
2016-02-15 09:00:00	1.22459	1.18815	1.20177	1.23117	1.1972	1.2385
2016-02-15 10:00:00	1.47231	1.45092	1.39717	1.49434	1.44465	1.48648
2016-02-15 11:00:00	1.3564	1.33811	1.28762	1.37537	1.32957	1.37058
2016-02-15 12:00:00	0.939506	0.914575	0.912026	0.94865	0.912812	0.953544
2016-02-15 13:00:00	0.842073	0.828546	0.866854	0.872802	0.815392	0.856539
2016-02-15 14:00:00	1.38161	1.38979	1.34425	1.42359	1.35459	1.39586
2016-02-15 15:00:00	1.27052	1.27932	1.2828	1.30871	1.24446	1.2852
2016-02-15 16:00:00	1.21843	1.22315	1.2409	1.24924	1.19287	1.23312
2016-02-15 17:00:00	1.54215	1.54821	1.53092	1.57307	1.51757	1.5566
2016-02-15 18:00:00	1.79723	1.81809	1.67825	1.78628	1.77581	1.814
2016-02-15 19:00:00	1.6664	1.67514	1.68397	1.65307	1.64285	1.6833
2016-02-15 20:00:00	1.75556	1.76446	1.71961	1.75536	1.7332	1.77278
2016-02-15 21:00:00	2.03597	2.04715	1.98195	2.04674	2.01413	2.05156
2016-02-15 22:00:00	3.42209	3.33653	3.27487	3.38477	3.40318	3.44465
2016-02-15 23:00:00	2.91006	2.86262	2.77638	2.8817	2.89229	2.9298
2016-02-16	1.69056	1.69268	1.69395	1.71109	1.66754	1.7056
2016-02-16 01:00:00	2.31077	2.30584	2.13887	2.30832	2.29025	2.32796
2016-02-16 02:00:00	1.46672	1.47442	1.43939	1.45861	1.44319	1.4823
2016-02-16 03:00:00	1.33407	1.31581	1.33133	1.36548	1.30973	1.34831
2016-02-16 04:00:00	1.06841	1.05326	1.00765	1.08088	1.04196	1.08262
2016-02-16 05:00:00	1.20969	1.20941	1.17941	1.23934	1.18379	1.22403
2016-02-16 06:00:00	1.00289	1.00934	1.01524	1.04229	0.975793	1.01706
2016-02-16 07:00:00	0.999329	1.00306	1.00715	1.03397	0.972099	1.01347
2016-02-16 08:00:00	1.28745	1.2946	1.28176	1.31533	1.26215	1.30232
2016-02-16 09:00:00	0.906571	0.901486	0.912357	0.924465	0.87967	0.921082
2016-02-16 10:00:00	1.59369	1.59584	1.4761	1.61989	1.56786	1.60847
2016-02-16 11:00:00	0.892902	0.88252	0.896499	0.912801	0.865641	0.907086
2016-02-16 12:00:00	1.38909	1.35475	1.40502	1.38828	1.3648	1.40345
2016-02-16 13:00:00	0.985268	0.95678	1.06152	0.963168	0.959197	0.99981
2016-02-16 14:00:00	1.20948	1.17393	1.15037	1.18078	1.1817	1.22419
2016-02-16 15:00:00	1.36617	1.34117	1.2863	1.34011	1.34014	1.38236
2016-02-16 16:00:00	0.567707	0.563159	0.646338	0.601684	0.540819	0.582869
2016-02-16 17:00:00	1.13461	1.12115	1.18418	1.15472	1.10861	1.14883
2016-02-16 18:00:00	0.694385	0.685458	0.738923	0.721791	0.667005	0.709065
2016-02-16 19:00:00	0.854902	0.844108	0.878005	0.891519	0.827168	0.869253
2016-02-16 20:00:00	1.03045	1.03096	1.06441	1.05314	1.00255	1.04424
2016-02-16 21:00:00	1.16088	1.15711	1.16337	1.18654	1.13391	1.17478
2016-02-16 22:00:00	0.966373	0.970297	0.96513	0.989274	0.938552	0.980174
2016-02-16 23:00:00	1.14265	1.1377	1.18985	1.1712	1.11585	1.15671
2016-02-17	1.19733	1.20033	1.22835	1.22207	1.17224	1.21232
2016-02-17 01:00:00	1.33042	1.33649	1.31173	1.34603	1.30499	1.34522
2016-02-17 02:00:00	0.722576	0.72214	0.756797	0.741719	0.696727	0.737315
2016-02-17 03:00:00	0.846589	0.849232	0.850448	0.842362	0.819911	0.861674
2016-02-17 04:00:00	1.0795	1.07213	1.09931	1.09698	1.05295	1.09388
2016-02-17 05:00:00	0.888528	0.883061	0.913703	0.921714	0.860643	0.902939
2016-02-17 06:00:00	1.112	1.10125	1.15359	1.1441	1.08435	1.12641
2016-02-17 07:00:00	0.817343	0.809143	0.843997	0.852243	0.789057	0.831822
2016-02-17 08:00:00	0.955346	0.937537	0.979158	0.984769	0.927255	0.9698
2016-02-17 09:00:00	0.989656	0.973296	1.05131	1.02035	0.961024	1.00393
2016-02-17 10:00:00	1.44218	1.42747	1.41543	1.47051	1.41453	1.4567
2016-02-17 11:00:00	0.850564	0.828486	0.874003	0.878639	0.821676	0.865041
2016-02-17 12:00:00	1.4357	1.36262	1.43654	1.42644	1.40892	1.45016
2016-02-17 13:00:00	0.863329	0.843127	0.896649	0.884584	0.835817	0.877977
2016-02-17 14:00:00	0.599505	0.588287	0.657144	0.632058	0.571006	0.614482
2016-02-17 15:00:00	0.843696	0.820876	0.87727	0.878328	0.814968	0.858195
2016-02-17 16:00:00	0.6024	0.593349	0.669518	0.640455	0.573711	0.617275
2016-02-17 17:00:00	0.89747	0.874938	0.924313	0.930074	0.868843	0.911848
2016-02-17 18:00:00	0.641899	0.634623	0.696543	0.6806	0.612973	0.656663
2016-02-17 19:00:00	0.999224	0.983914	1.04875	1.02827	0.970348	1.01384
2016-02-17 20:00:00	1.08315	1.06225	1.12371	1.11244	1.05404	1.09749
2016-02-17 21:00:00	0.86576	0.847475	0.885382	0.900084	0.83669	0.879869
2016-02-17 22:00:00	1.27772	1.24126	1.28386	1.31739	1.25062	1.29182
2016-02-17 23:00:00	1.23169	1.18218	1.15561	1.24177	1.20423	1.24556
2016-02-18	1.1974	1.17323	1.16648	1.224	1.17208	1.21188
2016-02-18 01:00:00	2.43923	2.38271	2.41851	2.44138	2.42011	2.45931
2016-02-18 02:00:00	2.39395	2.26932	2.26953	2.31814	2.37156	2.40857
2016-02-18 03:00:00	1.42865	1.38773	1.43451	1.41372	1.4035	1.44313
2016-02-18 04:00:00	1.10094	1.08014	1.09018	1.11512	1.0751	1.11535
2016-02-18 05:00:00	0.719453	0.705483	0.772775	0.746713	0.693049	0.734242
2016-02-18 06:00:00	1.15302	1.13228	1.14814	1.17836	1.12704	1.16746
2016-02-18 07:00:00	0.877233	0.859574	0.89383	0.900006	0.850672	0.891615
2016-02-18 08:00:00	0.923094	0.895785	0.92506	0.941197	0.89682	0.937601
2016-02-18 09:00:00	1.23045	1.2152	1.20467	1.2579	1.20393	1.24465
2016-02-18 10:00:00	1.38429	1.37232	1.36919	1.40758	1.35886	1.39901
2016-02-18 11:00:00	1.16188	1.14183	1.14554	1.18101	1.1358	1.17662
2016-02-18 12:00:00	1.44612	1.39033	1.46082	1.44284	1.42193	1.46057
2016-02-18 13:00:00	0.881654	0.861508	0.919088	0.892095	0.856603	0.896171
2016-02-18 14:00:00	0.486439	0.477859	0.559017	0.519138	0.461295	0.501911
2016-02-18 15:00:00	0.546782	0.544985	0.602526	0.586701	0.520502	0.561992
2016-02-18 16:00:00	0.314937	0.332879	0.460114	0.361039	0.290855	0.331168
2016-02-18 17:00:00	0.121346	0.168341	0.341521	0.177218	0.0998237	0.138557
2016-02-18 18:00:00	0.368261	0.376333	0.496465	0.402273	0.344523	0.384126
2016-02-18 19:00:00	0.243902	0.261084	0.419341	0.255284	0.222694	0.260083
2016-02-18 20:00:00	0.387219	0.391317	0.514035	0.407695	0.363109	0.402883
2016-02-18 21:00:00	1.03993	1.02649	1.04137	1.05931	1.01266	1.0538
2016-02-18 22:00:00	0.813079	0.813281	0.852652	0.846393	0.786612	0.827147
2016-02-18 23:00:00	0.980166	0.989275	1.03883	1.00764	0.953585	0.993873
2016-02-19	1.72098	1.73458	1.6714	1.7656	1.69816	1.73619
2016-02-19 01:00:00	1.19372	1.19016	1.21736	1.22221	1.16932	1.20806
2016-02-19 02:00:00	1.5785	1.56782	1.56197	1.57658	1.55573	1.59568
2016-02-19 03:00:00	1.17135	1.16101	1.15774	1.18568	1.14659	1.18607
2016-02-19 04:00:00	1.31213	1.30687	1.31326	1.35879	1.28654	1.32663
2016-02-19 05:00:00	1.33543	1.30321	1.30182	1.40105	1.31013	1.34979
2016-02-19 06:00:00	1.04945	1.04218	1.09167	1.07829	1.02357	1.0643
2016-02-19 07:00:00	1.22667	1.22364	1.18919	1.2566	1.20033	1.24099
2016-02-19 08:00:00	1.03832	1.02574	1.05535	1.06547	1.01166	1.05244
2016-02-19 09:00:00	1.17874	1.16604	1.17962	1.22115	1.15264	1.19306
2016-02-19 10:00:00	1.44117	1.44097	1.38107	1.48982	1.41455	1.45545
2016-02-19 11:00:00	1.15111	1.14115	1.17296	1.18849	1.12427	1.16515
2016-02-19 12:00:00	1.41444	1.37309	1.44265	1.41567	1.39021	1.42867
2016-02-19 13:00:00	0.943863	0.93067	0.974993	0.968019	0.91809	0.9582
2016-02-19 14:00:00	0.841298	0.839183	0.911317	0.863776	0.814808	0.855674
2016-02-19 15:00:00	0.415623	0.417452	0.520173	0.453112	0.391162	0.431382
2016-02-19 16:00:00	0.326616	0.344679	0.474194	0.373537	0.302571	0.342625
2016-02-19 17:00:00	0.422343	0.425284	0.528046	0.459395	0.397682	0.437968
2016-02-19 18:00:00	0.617506	0.617117	0.684666	0.651926	0.591065	0.632258
2016-02-19 19:00:00	0.671467	0.669051	0.706187	0.703075	0.64495	0.68616
2016-02-19 20:00:00	0.828599	0.828773	0.860599	0.867554	0.801389	0.84278
2016-02-19 21:00:00	0.909746	0.90682	0.913712	0.95411	0.882357	0.923813
2016-02-19 22:00:00	1.56106	1.56058	1.52362	1.61094	1.53594	1.57537
2016-02-19 23:00:00	1.11711	1.11268	1.15242	1.14632	1.09065	1.13155
2016-02-20	1.19526	1.19634	1.18167	1.2263	1.17036	1.20984
2016-02-20 01:00:00	0.89578	0.891481	0.913372	0.932021	0.870664	0.910286
2016-02-20 02:00:00	0.797758	0.797204	0.830571	0.820625	0.772374	0.812449
2016-02-20 03:00:00	0.747753	0.745419	0.785341	0.783511	0.722259	0.762547
2016-02-20 04:00:00	1.00934	1.00926	1.05	1.0465	0.982613	1.02357
2016-02-20 05:00:00	0.836467	0.830762	0.861629	0.869666	0.810276	0.851052
2016-02-20 06:00:00	0.956018	0.952819	0.972957	0.988042	0.928962	0.970238
2016-02-20 07:00:00	0.846366	0.838139	0.869364	0.879167	0.819629	0.860913
2016-02-20 08:00:00	0.787074	0.783864	0.810884	0.819902	0.759815	0.801506
2016-02-20 09:00:00	1.04272	1.02861	1.06589	1.07372	1.01574	1.05702
2016-02-20 10:00:00	0.723076	0.714823	0.766718	0.745575	0.695811	0.737618
2016-02-20 11:00:00	1.02308	1.00297	1.05887	1.04917	0.996023	1.03739
2016-02-20 12:00:00	1.47043	1.43822	1.46468	1.48996	1.44469	1.48488
2016-02-20 13:00:00	1.8623	1.75614	1.83973	1.82536	1.83811	1.87703
2016-02-20 14:00:00	1.12048	1.1015	1.12079	1.09706	1.09519	1.13669
2016-02-20 15:00:00	0.829073	0.817031	0.82628	0.781845	0.802751	0.844896
2016-02-20 16:00:00	0.667157	0.668943	0.715011	0.688835	0.639658	0.682172
2016-02-20 17:00:00	0.252181	0.279119	0.415717	0.288491	0.228622	0.268827
2016-02-20 18:00:00	0.486786	0.498795	0.544466	0.510988	0.46192	0.502009
2016-02-20 19:00:00	0.617276	0.61754	0.64501	0.651626	0.590862	0.632298
2016-02-20 20:00:00	0.997886	0.987171	1.0548	1.02823	0.97116	1.01215
2016-02-20 21:00:00	1.56464	1.55246	1.54044	1.60653	1.54	1.57934
2016-02-20 22:00:00	1.51821	1.50186	1.43485	1.54776	1.49307	1.5326
2016-02-20 23:00:00	1.01182	1.00433	1.0562	1.04147	0.984868	1.02639
2016-02-21	0.525112	0.533282	0.618659	0.57054	0.501508	0.540581
2016-02-21 01:00:00	0.553403	0.558501	0.629947	0.601116	0.529202	0.56879
2016-02-21 02:00:00	0.499764	0.506897	0.593137	0.546952	0.475518	0.515331
2016-02-21 03:00:00	0.50784	0.516958	0.59574	0.548337	0.482795	0.523267
2016-02-21 04:00:00	0.532967	0.533596	0.618342	0.576729	0.507885	0.548449
2016-02-21 05:00:00	0.435024	0.444214	0.561495	0.479953	0.409806	0.450669
2016-02-21 06:00:00	0.577165	0.569623	0.648601	0.614832	0.55107	0.592461
2016-02-21 07:00:00	0.521417	0.515221	0.628955	0.558986	0.495505	0.536695
2016-02-21 08:00:00	0.718316	0.690461	0.780519	0.758375	0.691375	0.733168
2016-02-21 09:00:00	0.573084	0.549541	0.66059	0.612414	0.546255	0.588317
2016-02-21 10:00:00	0.743757	0.712523	0.801054	0.781703	0.716196	0.758448
2016-02-21 11:00:00	0.75235	0.719727	0.80489	0.792397	0.724924	0.767097
2016-02-21 12:00:00	1.1633	1.13452	1.1623	1.21133	1.13581	1.17739
2016-02-21 13:00:00	0.727019	0.691175	0.767785	0.759577	0.70061	0.741958
2016-02-21 14:00:00	0.621863	0.596004	0.677681	0.645381	0.595496	0.637332
2016-02-21 15:00:00	0.58844	0.561842	0.651526	0.617076	0.562925	0.603876
2016-02-21 16:00:00	0.836357	0.803817	0.868559	0.87011	0.809859	0.851038
2016-02-21 17:00:00	0.766901	0.739098	0.867918	0.794957	0.739978	0.781539
2016-02-21 18:00:00	1.08099	1.05001	1.08766	1.11047	1.05543	1.09536
2016-02-21 19:00:00	1.10486	1.07022	1.07906	1.12157	1.07866	1.11889
2016-02-21 20:00:00	1.77259	1.72152	1.61162	1.73556	1.7511	1.78878
2016-02-21 21:00:00	1.25592	1.23396	1.20267	1.23337	1.23048	1.27129
2016-02-21 22:00:00	1.00896	0.991818	0.981782	1.01095	0.98236	1.0233
2016-02-21 23:00:00	1.38111	1.34611	1.36755	1.38332	1.35698	1.39554
2016-02-22	1.40363	1.34434	1.39839	1.41182	1.37967	1.41827
2016-02-22 01:00:00	1.35743	1.30413	1.37225	1.37516	1.33352	1.37201
2016-02-22 02:00:00	1.28572	1.26149	1.255	1.26896	1.2638	1.30107
2016-02-22 03:00:00	0.859415	0.86211	0.86837	0.833071	0.834682	0.875045
2016-02-22 04:00:00	0.828351	0.820022	0.852607	0.840447	0.804138	0.842768
2016-02-22 05:00:00	0.51223	0.507985	0.610395	0.527725	0.487532	0.527557
2016-02-22 06:00:00	0.518376	0.507973	0.621539	0.535693	0.493384	0.533812
2016-02-22 07:00:00	0.762345	0.739231	0.805392	0.78617	0.735611	0.777027
2016-02-22 08:00:00	0.758946	0.730074	0.806144	0.775999	0.731882	0.77355
2016-02-22 09:00:00	0.946439	0.904219	0.968343	0.959603	0.919121	0.960774
2016-02-22 10:00:00	1.11523	1.06313	1.11391	1.12144	1.08702	1.12919
2016-02-22 11:00:00	1.6327	1.54157	1.62009	1.62055	1.60727	1.64726
2016-02-22 12:00:00	1.23496	1.14634	1.20774	1.20587	1.20781	1.24917
2016-02-22 13:00:00	1.10836	1.03018	1.16281	1.07127	1.08209	1.12294
2016-02-22 14:00:00	0.940772	0.887641	0.965721	0.868971	0.915538	0.955948
2016-02-22 15:00:00	0.736006	0.699405	0.804328	0.691678	0.71033	0.751413
2016-02-22 16:00:00	0.665582	0.621099	0.775616	0.697847	0.639857	0.679891
2016-02-22 17:00:00	0.231129	0.242389	0.422402	0.23479	0.209221	0.247435
2016-02-22 18:00:00	0.223182	0.236859	0.402068	0.223216	0.200758	0.239477
2016-02-22 19:00:00	0.550292	0.530743	0.589938	0.550063	0.525218	0.565118
2016-02-22 20:00:00	0.778966	0.753535	0.829551	0.764162	0.752341	0.793082
2016-02-22 21:00:00	1.28212	1.19041	1.31751	1.31768	1.25489	1.29635
2016-02-22 22:00:00	2.90337	2.8261	2.88019	2.90279	2.88539	2.92268
2016-02-22 23:00:00	3.78773	3.63349	3.58145	3.81112	3.76605	3.81195
2016-02-23	2.60702	2.5616	2.57209	2.57663	2.58543	2.62563
2016-02-23 01:00:00	1.83152	1.78818	1.6871	1.78309	1.80941	1.84725
2016-02-23 02:00:00	1.29085	1.26169	1.23551	1.25232	1.26542	1.30654
2016-02-23 03:00:00	1.18822	1.14424	1.19902	1.10946	1.16381	1.20354
2016-02-23 04:00:00	1.09777	1.04939	1.0804	1.00555	1.07174	1.11355
2016-02-23 05:00:00	1.02991	0.988128	1.0252	0.940092	1.004	1.04571
2016-02-23 06:00:00	0.574641	0.55981	0.653619	0.57897	0.549579	0.589497
2016-02-23 07:00:00	0.719678	0.694869	0.785211	0.7249	0.693407	0.734104
2016-02-23 08:00:00	0.737149	0.709411	0.800156	0.742799	0.710546	0.751472
2016-02-23 09:00:00	0.738841	0.708148	0.797233	0.72712	0.710576	0.753051
2016-02-23 10:00:00	1.09449	1.0251	1.11331	1.07368	1.06254	1.10823
2016-02-23 11:00:00	1.31641	1.21631	1.31337	1.32867	1.28519	1.33026
2016-02-23 12:00:00	1.08439	1.0048	1.12358	1.06966	1.05684	1.09827
2016-02-23 13:00:00	1.11368	1.0738	1.16891	1.12916	1.08757	1.12777
2016-02-23 14:00:00	0.624137	0.603668	0.692143	0.708633	0.597767	0.638847
2016-02-23 15:00:00	0.684353	0.676909	0.739571	0.734454	0.657231	0.699047
2016-02-23 16:00:00	0.224481	0.248281	0.419274	0.275869	0.201209	0.240917
2016-02-23 17:00:00	0.816402	0.810845	0.877481	0.852381	0.790539	0.831016
2016-02-23 18:00:00	0.843419	0.833729	0.922055	0.880786	0.816651	0.858077
2016-02-23 19:00:00	0.605636	0.597707	0.664981	0.637348	0.578935	0.620468
2016-02-23 20:00:00	0.826684	0.802447	0.911298	0.852993	0.799452	0.8408
2016-02-23 21:00:00	0.901004	0.873017	0.951176	0.924163	0.872746	0.914764
2016-02-23 22:00:00	1.18303	1.13874	1.19575	1.21719	1.15322	1.19674
2016-02-23 23:00:00	0.880835	0.86143	0.934398	0.917046	0.851335	0.894803
2016-02-24	0.870344	0.855664	0.9303	0.912785	0.84459	0.884787
2016-02-24 01:00:00	1.05036	1.02906	1.08969	1.07853	1.02344	1.06437
2016-02-24 02:00:00	1.02594	1.00298	1.13771	1.03681	1.00049	1.04064
2016-02-24 03:00:00	0.762623	0.746907	0.779249	0.773754	0.737374	0.777336
2016-02-24 04:00:00	0.724298	0.713515	0.758636	0.747906	0.699446	0.739022
2016-02-24 05:00:00	0.678686	0.672786	0.730969	0.699419	0.653487	0.693298
2016-02-24 06:00:00	0.989087	0.976754	1.03146	1.02766	0.963218	1.00336
2016-02-24 07:00:00	0.754275	0.744852	0.801127	0.791129	0.728822	0.768905
2016-02-24 08:00:00	0.761003	0.752884	0.805519	0.789732	0.735156	0.775415
2016-02-24 09:00:00	0.913572	0.902326	0.933782	0.953075	0.887606	0.927965
2016-02-24 10:00:00	0.991985	0.984036	1.03905	1.03719	0.966026	1.00622
2016-02-24 11:00:00	1.11399	1.10767	1.11049	1.15995	1.08699	1.12796
2016-02-24 12:00:00	1.50218	1.4386	1.4887	1.49411	1.4781	1.51674
2016-02-24 13:00:00	0.645647	0.631586	0.69184	0.680446	0.619644	0.660558
2016-02-24 14:00:00	0.522592	0.514164	0.611146	0.55838	0.496785	0.537755
2016-02-24 15:00:00	0.760221	0.739471	0.799298	0.80132	0.733161	0.774802
2016-02-24 16:00:00	0.727792	0.714937	0.771748	0.765167	0.700321	0.74258
2016-02-24 17:00:00	1.06934	1.05619	1.13809	1.10913	1.04233	1.08391
2016-02-24 18:00:00	0.689374	0.683846	0.753598	0.74062	0.661526	0.704058
2016-02-24 19:00:00	0.679009	0.677788	0.754699	0.727925	0.650886	0.693549
2016-02-24 20:00:00	0.987887	0.978814	1.04599	1.04348	0.959222	1.00194
2016-02-24 21:00:00	1.05129	1.04204	1.09241	1.10823	1.02289	1.06531
2016-02-24 22:00:00	0.860154	0.860916	0.878126	0.912358	0.83133	0.874155
2016-02-24 23:00:00	1.55147	1.54677	1.56172	1.59715	1.52618	1.56575
2016-02-25	3.23106	3.14146	2.9692	3.19691	3.20938	3.2529
2016-02-25 01:00:00	1.80501	1.80957	1.72144	1.81334	1.7832	1.82068
2016-02-25 02:00:00	1.73761	1.7261	1.68987	1.68053	1.71454	1.75228
2016-02-25 03:00:00	1.46547	1.46541	1.41447	1.42356	1.4413	1.48107
2016-02-25 04:00:00	0.60253	0.605914	0.654641	0.643119	0.577123	0.617671
2016-02-25 05:00:00	0.580933	0.582737	0.659408	0.628931	0.555673	0.59618
2016-02-25 06:00:00	0.530481	0.535289	0.627131	0.574309	0.505015	0.545711
2016-02-25 07:00:00	0.59639	0.59191	0.673889	0.640819	0.570874	0.611535
2016-02-25 08:00:00	0.537545	0.533587	0.632063	0.582753	0.511963	0.552887
2016-02-25 09:00:00	0.570409	0.567784	0.657563	0.611563	0.543922	0.585439
2016-02-25 10:00:00	0.875763	0.861605	0.920601	0.920293	0.848503	0.890204
2016-02-25 11:00:00	0.894834	0.878595	0.924285	0.936002	0.867338	0.909192
2016-02-25 12:00:00	0.912959	0.880636	1.00201	0.918178	0.886592	0.927643
2016-02-25 13:00:00	0.635464	0.626093	0.734565	0.663371	0.61001	0.650938
2016-02-25 14:00:00	0.23638	0.239595	0.439832	0.284976	0.212941	0.253024
2016-02-25 15:00:00	0.409733	0.401841	0.562566	0.443123	0.384953	0.425576
2016-02-25 16:00:00	0.365404	0.364869	0.523674	0.410726	0.340665	0.38135
2016-02-25 17:00:00	0.384033	0.390323	0.531234	0.42609	0.358392	0.399736
2016-02-25 18:00:00	0.415561	0.416827	0.55377	0.460708	0.390267	0.43123
2016-02-25 19:00:00	0.222086	0.236732	0.426262	0.272345	0.199022	0.238634
2016-02-25 20:00:00	0.40854	0.415648	0.544587	0.461361	0.382998	0.424146
2016-02-25 21:00:00	0.834684	0.823502	0.869472	0.891078	0.807573	0.84894
2016-02-25 22:00:00	0.745974	0.7463	0.801077	0.798016	0.718443	0.760265
2016-02-25 23:00:00	0.904142	0.899298	0.931888	0.955379	0.877344	0.918726
2016-02-26	0.954616	0.951947	0.992408	1.0051	0.930202	0.969105
2016-02-26 01:00:00	0.651815	0.652915	0.72212	0.699804	0.62764	0.666715
2016-02-26 02:00:00	0.751952	0.748211	0.798691	0.800646	0.727409	0.766723
2016-02-26 03:00:00	0.562839	0.564748	0.650058	0.612496	0.538679	0.578076
2016-02-26 04:00:00	0.943226	0.938286	0.943977	0.974783	0.917987	0.957651
2016-02-26 05:00:00	0.833586	0.826586	0.859449	0.880747	0.808112	0.848156
2016-02-26 06:00:00	1.14204	1.14254	1.14676	1.19319	1.11579	1.15615
2016-02-26 07:00:00	0.888326	0.87645	0.901971	0.929606	0.862325	0.902744
2016-02-26 08:00:00	1.01388	1.0006	1.04832	1.05851	0.987794	1.02817
2016-02-26 09:00:00	1.01411	1.00507	1.03497	1.06033	0.987348	1.02818
2016-02-26 10:00:00	1.23602	1.22571	1.2184	1.29097	1.2098	1.25025
2016-02-26 11:00:00	1.47259	1.4655	1.41706	1.53154	1.4466	1.48706
2016-02-26 12:00:00	1.59736	1.54472	1.53253	1.59918	1.57453	1.61242
2016-02-26 13:00:00	0.659828	0.644687	0.711388	0.6905	0.634894	0.674911
2016-02-26 14:00:00	0.550242	0.543393	0.62127	0.594925	0.524896	0.565445
2016-02-26 15:00:00	0.365119	0.371432	0.491656	0.41138	0.341085	0.38116
2016-02-26 16:00:00	0.592044	0.595343	0.640729	0.645671	0.56567	0.607173
2016-02-26 17:00:00	0.764692	0.769142	0.808667	0.824725	0.736732	0.779209
2016-02-26 18:00:00	0.294629	0.314193	0.458589	0.354927	0.271073	0.310905
2016-02-26 19:00:00	0.158047	0.189228	0.378875	0.222398	0.136268	0.174983
2016-02-26 20:00:00	0.352223	0.36638	0.499174	0.415988	0.327858	0.368054
2016-02-26 21:00:00	0.478853	0.490094	0.575784	0.541422	0.452716	0.494166
2016-02-26 22:00:00	1.42492	1.40278	1.43283	1.42635	1.40048	1.44037
2016-02-26 23:00:00	2.47716	2.36377	2.4362	2.53346	2.45825	2.49561
2016-02-27	2.59093	2.60178	2.56674	2.54687	2.57376	2.61285
2016-02-27 01:00:00	1.81961	1.81039	1.76814	1.86446	1.7982	1.83523
2016-02-27 02:00:00	1.49828	1.50106	1.41553	1.5218	1.47489	1.5151
2016-02-27 03:00:00	1.23483	1.19977	1.21528	1.29271	1.2104	1.24964
2016-02-27 04:00:00	0.611519	0.613554	0.649193	0.657595	0.586835	0.626558
2016-02-27 05:00:00	0.933091	0.935013	0.955288	0.986162	0.906929	0.947262
2016-02-27 06:00:00	0.864696	0.863525	0.872333	0.912672	0.83843	0.878947
2016-02-27 07:00:00	1.08353	1.07613	1.13891	1.1387	1.05775	1.09781
2016-02-27 08:00:00	0.993258	0.988181	1.04415	1.04598	0.966572	1.00739
2016-02-27 09:00:00	0.879911	0.872114	0.897006	0.92911	0.853117	0.894114
2016-02-27 10:00:00	1.14626	1.13515	1.15126	1.21	1.11989	1.16047
2016-02-27 11:00:00	0.834713	0.824288	0.865793	0.886331	0.807597	0.84898
2016-02-27 12:00:00	1.42723	1.40525	1.39626	1.48063	1.40227	1.44152
2016-02-27 13:00:00	1.15032	1.13887	1.17334	1.19642	1.12504	1.1645
2016-02-27 14:00:00	0.545041	0.542236	0.603633	0.593346	0.519605	0.56012
2016-02-27 15:00:00	0.804484	0.797199	0.855236	0.858216	0.778502	0.819102
2016-02-27 16:00:00	0.268158	0.271171	0.433611	0.282346	0.246263	0.284977
2016-02-27 17:00:00	0.543345	0.527847	0.614956	0.551922	0.518899	0.55841
2016-02-27 18:00:00	0.367409	0.374919	0.477283	0.382037	0.344743	0.383085
2016-02-27 19:00:00	0.371274	0.382648	0.49449	0.394148	0.347622	0.386946
2016-02-27 20:00:00	0.374729	0.392796	0.500391	0.413773	0.350665	0.390415
2016-02-27 21:00:00	0.761796	0.758066	0.815585	0.803512	0.735215	0.776479
2016-02-27 22:00:00	0.630369	0.637114	0.67704	0.677412	0.603466	0.64537
2016-02-27 23:00:00	0.775559	0.780325	0.820658	0.823586	0.74798	0.789757
2016-02-28	1.0601	1.05228	1.07548	1.06732	1.03645	1.07425
2016-02-28 01:00:00	1.14772	1.15177	1.12693	1.17185	1.12293	1.16377
2016-02-28 02:00:00	0.923371	0.928555	0.938466	0.959591	0.898829	0.937642
2016-02-28 03:00:00	0.721106	0.723758	0.781049	0.761156	0.695863	0.735776
2016-02-28 04:00:00	0.573321	0.580956	0.647493	0.620273	0.548934	0.588408
2016-02-28 05:00:00	0.886614	0.884475	0.918122	0.937076	0.860932	0.901027
2016-02-28 06:00:00	0.77394	0.764497	0.816248	0.816999	0.748594	0.788596
2016-02-28 07:00:00	0.948688	0.932488	0.959055	0.996518	0.922497	0.963091
2016-02-28 08:00:00	1.00229	0.974552	0.976739	1.06864	0.97593	1.01648
2016-02-28 09:00:00	0.822771	0.814866	0.864427	0.867461	0.795766	0.837206
2016-02-28 10:00:00	0.82501	0.817318	0.8587	0.867631	0.797561	0.839311
2016-02-28 11:00:00	0.881424	0.865143	0.905988	0.913148	0.85441	0.895872
2016-02-28 12:00:00	1.00444	0.979375	1.03302	1.04136	0.977749	1.01861
2016-02-28 13:00:00	1.22859	1.173	1.25337	1.23658	1.20179	1.2429
2016-02-28 14:00:00	0.915289	0.875298	0.995279	0.927842	0.888364	0.929624
2016-02-28 15:00:00	0.302109	0.312691	0.44306	0.335224	0.278036	0.318428
2016-02-28 16:00:00	0.488689	0.477914	0.58969	0.526195	0.462941	0.504105
2016-02-28 17:00:00	0.445718	0.431484	0.580812	0.470537	0.420201	0.461726
2016-02-28 18:00:00	0.348135	0.346236	0.51931	0.383126	0.324137	0.364303
2016-02-28 19:00:00	0.699131	0.672871	0.728571	0.716586	0.672337	0.715157
2016-02-28 20:00:00	0.906262	0.857467	0.923459	0.92304	0.877456	0.919748
2016-02-28 21:00:00	0.458697	0.453239	0.595435	0.449654	0.432527	0.474319
2016-02-28 22:00:00	0.60726	0.603012	0.68027	0.648469	0.580112	0.622
2016-02-28 23:00:00	1.62567	1.56074	1.59916	1.63108	1.60249	1.64011
2016-02-29	2.63866	2.5491	2.48733	2.63437	2.61956	2.65745
2016-02-29 01:00:00	2.54725	2.48242	2.43691	2.55438	2.52866	2.5656
2016-02-29 02:00:00	1.37934	1.36756	1.36321	1.39425	1.3567	1.39378
2016-02-29 03:00:00	1.16713	1.15433	1.12199	1.16002	1.14305	1.18124
2016-02-29 04:00:00	0.773115	0.753569	0.767059	0.77983	0.748937	0.787421
2016-02-29 05:00:00	0.685473	0.66188	0.691976	0.689801	0.659896	0.700036
2016-02-29 06:00:00	0.723351	0.694679	0.733065	0.730354	0.696837	0.737824
2016-02-29 07:00:00	0.811687	0.779042	0.820152	0.816489	0.784465	0.825829
2016-02-29 08:00:00	0.809377	0.778298	0.822727	0.809801	0.782071	0.823475
2016-02-29 09:00:00	0.882699	0.844396	0.881827	0.886735	0.85513	0.896684
2016-02-29 10:00:00	0.902859	0.860424	0.895667	0.907342	0.874942	0.916834
2016-02-29 11:00:00	1.26211	1.19713	1.26272	1.27404	1.2337	1.27586
2016-02-29 12:00:00	0.847851	0.806814	0.845563	0.850108	0.820069	0.861914
2016-02-29 13:00:00	0.803615	0.786601	0.840437	0.823504	0.778121	0.818552
2016-02-29 14:00:00	1.04779	1.0319	1.06537	1.07299	1.02173	1.06204
2016-02-29 15:00:00	1.04924	1.01511	1.01162	1.06811	1.02188	1.0633
2016-02-29 16:00:00	0.81766	0.799168	0.847385	0.843262	0.789666	0.832013
2016-02-29 17:00:00	0.668936	0.661426	0.670591	0.700144	0.64203	0.683464
2016-02-29 18:00:00	0.438513	0.444037	0.562735	0.478516	0.413632	0.453888
2016-02-29 19:00:00	0.462957	0.477285	0.570435	0.507841	0.436642	0.478049
2016-02-29 20:00:00	0.236974	0.266649	0.406517	0.294499	0.213697	0.253214
2016-02-29 21:00:00	0.409737	0.429933	0.547137	0.452453	0.3842	0.425136
2016-02-29 22:00:00	1.51553	1.47273	1.42788	1.46448	1.48836	1.52664
2016-02-29 23:00:00	4.30267	4.20793	3.71587	4.23755	4.28457	4.3356
2016-03-01	1.04442	1.05187	1.05588	1.04517	1.02028	1.05894
2016-03-01 01:00:00	1.19568	1.20449	1.10939	1.18031	1.17117	1.21038
2016-03-01 02:00:00	1.1547	1.16642	1.11905	1.1438	1.12987	1.17035
2016-03-01 03:00:00	0.876519	0.869577	0.874801	0.922089	0.851013	0.890647
2016-03-01 04:00:00	0.5478	0.556221	0.627978	0.593855	0.523327	0.562912
2016-03-01 05:00:00	0.647356	0.659843	0.693368	0.675706	0.621879	0.661975
2016-03-01 06:00:00	0.670385	0.678943	0.71146	0.701371	0.64453	0.684984
2016-03-01 07:00:00	0.868621	0.866043	0.883758	0.903316	0.842786	0.883053
2016-03-01 08:00:00	0.684164	0.686605	0.733419	0.721365	0.657856	0.698729
2016-03-01 09:00:00	0.789689	0.787032	0.82691	0.824318	0.763329	0.804176
2016-03-01 10:00:00	0.806229	0.803914	0.839078	0.839005	0.779359	0.820607
2016-03-01 11:00:00	1.25202	1.24498	1.26332	1.25757	1.22695	1.2661
2016-03-01 12:00:00	1.3391	1.3245	1.33147	1.32797	1.31459	1.35371
2016-03-01 13:00:00	0.399842	0.399319	0.559806	0.424677	0.375864	0.415715
2016-03-01 14:00:00	0.776464	0.768033	0.800633	0.798967	0.750109	0.792251
2016-03-01 15:00:00	0.920437	0.896469	0.941502	0.926374	0.891943	0.933442
2016-03-01 16:00:00	0.108983	0.148631	0.335138	0.176491	0.0869663	0.126217
2016-03-01 17:00:00	0.0938525	0.131623	0.326989	0.167431	0.072304	0.111178
2016-03-01 18:00:00	0.0622108	0.10603	0.318578	0.136864	0.0412323	0.0797709
2016-03-01 19:00:00	0.245441	0.275847	0.424101	0.297706	0.22235	0.261931
2016-03-01 20:00:00	0.14939	0.190093	0.377261	0.210734	0.126901	0.166068
2016-03-01 21:00:00	0.344383	0.377736	0.479675	0.38071	0.319573	0.359833
2016-03-01 22:00:00	0.52679	0.556452	0.610215	0.551635	0.500336	0.541421
2016-03-01 23:00:00	0.984927	0.986033	1.03347	0.998451	0.957193	0.998573
2016-03-02	1.23974	1.20851	1.2275	1.2406	1.21526	1.25419
2016-03-02 01:00:00	1.121	1.11921	1.17287	1.11736	1.09713	1.13575
2016-03-02 02:00:00	0.92635	0.921622	0.957694	0.906928	0.90128	0.940935
2016-03-02 03:00:00	0.857098	0.843305	0.84354	0.836227	0.831681	0.872319
2016-03-02 04:00:00	0.775325	0.763553	0.831729	0.785926	0.750278	0.789995
2016-03-02 05:00:00	0.567237	0.557118	0.646549	0.595628	0.541347	0.58234
2016-03-02 06:00:00	0.627844	0.612435	0.698093	0.659778	0.601993	0.642897
2016-03-02 07:00:00	0.662418	0.645031	0.715281	0.689779	0.63686	0.677334
2016-03-02 08:00:00	0.578017	0.563287	0.652949	0.607385	0.552384	0.593062
2016-03-02 09:00:00	0.664325	0.64391	0.704594	0.680888	0.639	0.679176
2016-03-02 10:00:00	0.669099	0.648805	0.722275	0.69231	0.643407	0.68393
2016-03-02 11:00:00	1.04356	1.03177	1.04503	1.04826	1.01941	1.05764
2016-03-02 12:00:00	1.30613	1.2794	1.30276	1.26163	1.28252	1.32075
2016-03-02 13:00:00	0.709199	0.682624	0.811259	0.717601	0.684086	0.724164
2016-03-02 14:00:00	0.424736	0.414206	0.531717	0.454435	0.399698	0.440365
2016-03-02 15:00:00	0.356129	0.354331	0.498932	0.384651	0.331687	0.371923
2016-03-02 16:00:00	0.384385	0.380014	0.498172	0.416092	0.360431	0.400167
2016-03-02 17:00:00	0.412608	0.42	0.523182	0.441846	0.389123	0.428257
2016-03-02 18:00:00	0.12641	0.153474	0.364028	0.165971	0.105096	0.143736
2016-03-02 19:00:00	0.0653572	0.101359	0.297127	0.118676	0.04495	0.0828561
2016-03-02 20:00:00	0.142983	0.171679	0.339158	0.190908	0.121256	0.159902
2016-03-02 21:00:00	0.289944	0.317517	0.439485	0.320633	0.266305	0.305928
2016-03-02 22:00:00	0.87419	0.88369	0.891545	0.893661	0.847686	0.888065
2016-03-02 23:00:00	1.49413	1.47023	1.47831	1.48272	1.47031	1.50813
2016-03-03	1.5692	1.59826	1.57211	1.57361	1.5475	1.58414
2016-03-03 01:00:00	1.65668	1.65929	1.57898	1.63915	1.63467	1.67201
2016-03-03 02:00:00	3.06067	2.98471	2.83761	2.97239	3.04377	3.08352
2016-03-03 03:00:00	2.08035	2.06911	1.93998	1.95254	2.05981	2.0976
2016-03-03 04:00:00	1.13297	1.11472	1.04898	1.10705	1.10443	1.14681
2016-03-03 05:00:00	0.445365	0.454471	0.56087	0.502916	0.420373	0.461056
2016-03-03 06:00:00	0.685664	0.689191	0.731815	0.729288	0.659023	0.700468
2016-03-03 07:00:00	0.762593	0.765571	0.813338	0.802367	0.735533	0.77713
2016-03-03 08:00:00	0.753676	0.751795	0.797166	0.793824	0.726549	0.768323
2016-03-03 09:00:00	0.804676	0.80035	0.834109	0.841176	0.777333	0.819181
2016-03-03 10:00:00	0.757394	0.745861	0.805045	0.787343	0.730879	0.771967
2016-03-03 11:00:00	1.15603	1.13695	1.16369	1.16807	1.13053	1.17013
2016-03-03 12:00:00	1.02487	1.00557	1.04031	1.03277	0.999556	1.03923
2016-03-03 13:00:00	0.605493	0.585913	0.698763	0.63412	0.57907	0.620549
2016-03-03 14:00:00	0.448616	0.436256	0.536525	0.475392	0.423143	0.464169
2016-03-03 15:00:00	0.653374	0.654351	0.730051	0.675277	0.627158	0.668276
2016-03-03 16:00:00	0.564828	0.574325	0.644743	0.605704	0.538335	0.580017
2016-03-03 17:00:00	0.366834	0.387004	0.479648	0.411858	0.341517	0.382709
2016-03-03 18:00:00	0.24302	0.269755	0.438532	0.281544	0.219929	0.260001
2016-03-03 19:00:00	0.214254	0.238716	0.420165	0.260624	0.191428	0.231073
2016-03-03 20:00:00	0.218078	0.244224	0.397293	0.267883	0.1955	0.234617
2016-03-03 21:00:00	0.601849	0.603614	0.64022	0.645895	0.575802	0.616501
2016-03-03 22:00:00	0.607457	0.629959	0.666314	0.631132	0.580347	0.622101
2016-03-03 23:00:00	1.40164	1.38964	1.36528	1.38844	1.3759	1.41557
2016-03-04	1.8078	1.79302	1.79981	1.81356	1.78738	1.8234
2016-03-04 01:00:00	1.23726	1.24126	1.26484	1.25003	1.21138	1.25164
2016-03-04 02:00:00	2.15075	2.11612	1.97564	2.04986	2.12789	2.16769
2016-03-04 03:00:00	1.72126	1.70116	1.61659	1.63219	1.69587	1.73543
2016-03-04 04:00:00	0.462661	0.460196	0.558478	0.501704	0.43778	0.478452
2016-03-04 05:00:00	0.447533	0.437603	0.564563	0.474316	0.421945	0.463287
2016-03-04 06:00:00	0.748231	0.730444	0.803472	0.764025	0.722019	0.763124
2016-03-04 07:00:00	0.815506	0.804446	0.848181	0.832202	0.789288	0.830232
2016-03-04 08:00:00	0.787	0.781918	0.828373	0.815357	0.759885	0.8017
2016-03-04 09:00:00	0.863179	0.857684	0.892975	0.883403	0.836655	0.877688
2016-03-04 10:00:00	0.825737	0.811286	0.859407	0.840869	0.799109	0.840346
2016-03-04 11:00:00	1.10214	1.09582	1.12888	1.12026	1.07456	1.11645
2016-03-04 12:00:00	1.29686	1.26354	1.28903	1.28787	1.27159	1.31126
2016-03-04 13:00:00	0.750018	0.742739	0.822057	0.766969	0.723362	0.764602
2016-03-04 14:00:00	0.583662	0.576083	0.643054	0.617047	0.556551	0.598674
2016-03-04 15:00:00	0.521752	0.516942	0.605185	0.556642	0.495067	0.536953
2016-03-04 16:00:00	0.266678	0.265367	0.451939	0.310672	0.242745	0.283064
2016-03-04 17:00:00	0.183461	0.203831	0.365547	0.228086	0.159699	0.20022
2016-03-04 18:00:00	0.112193	0.145729	0.33324	0.163693	0.0898442	0.129413
2016-03-04 19:00:00	0.161689	0.18406	0.356954	0.21053	0.139324	0.178542
2016-03-04 20:00:00	0.59087	0.595604	0.632129	0.599219	0.565351	0.606079
2016-03-04 21:00:00	0.942751	0.950205	0.923279	0.938864	0.916331	0.95674
2016-03-04 22:00:00	1.12409	1.13586	1.11394	1.13693	1.09787	1.13806
2016-03-04 23:00:00	1.66833	1.6897	1.60233	1.66749	1.64587	1.68287
2016-03-05	3.50947	3.55122	3.3552	3.49078	3.48868	3.53283
2016-03-05 01:00:00	1.51684	1.52957	1.51622	1.52347	1.49302	1.53138
2016-03-05 02:00:00	1.39258	1.40362	1.36872	1.39414	1.36782	1.40702
2016-03-05 03:00:00	1.31301	1.30885	1.31559	1.24834	1.28868	1.32873
2016-03-05 04:00:00	1.12529	1.10562	1.08331	1.11153	1.09835	1.13999
2016-03-05 05:00:00	0.804807	0.789905	0.792956	0.776811	0.778911	0.820936
2016-03-05 06:00:00	0.611166	0.601757	0.670909	0.645703	0.584936	0.626192
2016-03-05 07:00:00	0.706485	0.698207	0.748188	0.737543	0.680722	0.721287
2016-03-05 08:00:00	0.941451	0.933566	0.94564	0.966825	0.915624	0.955758
2016-03-05 09:00:00	0.754563	0.744897	0.801433	0.782826	0.728624	0.769101
2016-03-05 10:00:00	1.56934	1.55442	1.52825	1.58074	1.54616	1.58393
2016-03-05 11:00:00	0.843603	0.832732	0.877285	0.854496	0.818012	0.858114
2016-03-05 12:00:00	0.503877	0.497627	0.593974	0.542307	0.478646	0.519233
2016-03-05 13:00:00	0.488775	0.483256	0.603785	0.524981	0.464305	0.504071
2016-03-05 14:00:00	0.426107	0.425631	0.531088	0.468352	0.402201	0.441703
2016-03-05 15:00:00	0.226605	0.243435	0.408299	0.27613	0.204737	0.243195
2016-03-05 16:00:00	0.0668014	0.100729	0.29458	0.121068	0.0471458	0.0843443
2016-03-05 17:00:00	0.234894	0.256774	0.42216	0.277572	0.212709	0.251273
2016-03-05 18:00:00	0.228589	0.250679	0.435143	0.261947	0.206335	0.244982
2016-03-05 19:00:00	0.344808	0.36152	0.494141	0.361079	0.321368	0.360914
2016-03-05 20:00:00	0.512529	0.526462	0.601211	0.532859	0.487277	0.527838
2016-03-05 21:00:00	0.298654	0.332418	0.466898	0.333965	0.274452	0.314492
2016-03-05 22:00:00	0.498804	0.523549	0.592981	0.528177	0.472688	0.513702
2016-03-05 23:00:00	0.843691	0.85694	0.873332	0.867491	0.81678	0.857622
2016-03-06	0.683533	0.688307	0.730366	0.717306	0.659172	0.6984
2016-03-06 01:00:00	0.676068	0.686867	0.735161	0.713418	0.650868	0.690855
2016-03-06 02:00:00	0.76619	0.774005	0.811653	0.798211	0.740368	0.780812
2016-03-06 03:00:00	0.682345	0.691773	0.735513	0.722665	0.656418	0.697176
2016-03-06 04:00:00	0.749851	0.756224	0.793906	0.785115	0.723751	0.764502
2016-03-06 05:00:00	0.721102	0.72284	0.782113	0.757343	0.695422	0.735775
2016-03-06 06:00:00	0.728018	0.721116	0.783757	0.763369	0.701755	0.742704
2016-03-06 07:00:00	0.71142	0.713083	0.761811	0.74681	0.685373	0.726154
2016-03-06 08:00:00	0.824316	0.808709	0.853524	0.85205	0.797595	0.838814
2016-03-06 09:00:00	0.75499	0.74755	0.804781	0.783536	0.728029	0.769496
2016-03-06 10:00:00	0.705321	0.693143	0.756888	0.728171	0.677994	0.719925
2016-03-06 11:00:00	0.885512	0.853777	0.916552	0.882322	0.85859	0.899693
2016-03-06 12:00:00	0.723664	0.696028	0.770582	0.719931	0.697491	0.738195
2016-03-06 13:00:00	0.537975	0.52204	0.624888	0.56339	0.511936	0.553108
2016-03-06 14:00:00	0.368761	0.37297	0.49625	0.407275	0.344389	0.384545
2016-03-06 15:00:00	0.177879	0.201786	0.361961	0.225301	0.155602	0.194748
2016-03-06 16:00:00	0.183154	0.211265	0.367323	0.232399	0.161097	0.199959
2016-03-06 17:00:00	0.114939	0.152726	0.317137	0.166652	0.093726	0.132122
2016-03-06 18:00:00	0.0648375	0.108468	0.307755	0.109684	0.0454656	0.0826515
2016-03-06 19:00:00	0.109711	0.14834	0.325363	0.154183	0.0894855	0.127089
2016-03-06 20:00:00	0.102272	0.142714	0.334215	0.158315	0.0815986	0.119422
2016-03-06 21:00:00	0.251392	0.28748	0.429467	0.294988	0.227825	0.267568
2016-03-06 22:00:00	0.772747	0.790698	0.835482	0.783356	0.746102	0.787048
2016-03-06 23:00:00	1.53069	1.50704	1.5458	1.51734	1.507	1.54491
2016-03-07	1.91245	1.88716	1.86845	1.89184	1.89041	1.92812
2016-03-07 01:00:00	1.70906	1.6741	1.62491	1.68326	1.68632	1.72457
2016-03-07 02:00:00	1.57135	1.55271	1.55927	1.55781	1.54772	1.58636
2016-03-07 03:00:00	0.81632	0.815114	0.847401	0.843262	0.791735	0.830984
2016-03-07 04:00:00	0.497421	0.501737	0.581672	0.541501	0.473796	0.512935
2016-03-07 05:00:00	0.6852	0.67216	0.721734	0.742328	0.660273	0.699878
2016-03-07 06:00:00	0.601674	0.607695	0.648987	0.633109	0.576707	0.616556
2016-03-07 07:00:00	0.707673	0.706867	0.750349	0.737021	0.681815	0.722242
2016-03-07 08:00:00	0.722599	0.715214	0.777088	0.750077	0.696201	0.737193
2016-03-07 09:00:00	0.863356	0.847174	0.917202	0.89457	0.836802	0.877871
2016-03-07 10:00:00	0.696805	0.687418	0.7551	0.728346	0.669372	0.711403
2016-03-07 11:00:00	1.11378	1.08928	1.16683	1.14512	1.08649	1.12804
2016-03-07 12:00:00	1.20765	1.15569	1.26152	1.20712	1.18006	1.222
2016-03-07 13:00:00	1.03442	0.987796	1.06535	1.05067	1.00592	1.04925
2016-03-07 14:00:00	1.06236	1.04536	1.15757	1.06866	1.03642	1.07701
2016-03-07 15:00:00	0.379854	0.382605	0.502565	0.409603	0.355022	0.395917
2016-03-07 16:00:00	0.36424	0.370931	0.443461	0.390511	0.339477	0.380348
2016-03-07 17:00:00	0.266076	0.281411	0.420108	0.303018	0.243142	0.282656
2016-03-07 18:00:00	0.329091	0.340528	0.518877	0.357527	0.306002	0.345804
2016-03-07 19:00:00	0.753869	0.762723	0.828429	0.768106	0.727254	0.768421
2016-03-07 20:00:00	0.753912	0.759962	0.811656	0.771523	0.727115	0.768162
2016-03-07 21:00:00	2.4271	2.37784	2.39156	2.39014	2.40925	2.44688
2016-03-07 22:00:00	2.99798	2.91497	2.86489	2.92866	2.98147	3.02163
2016-03-07 23:00:00	2.69751	2.63435	2.57199	2.64102	2.6803	2.7172
2016-03-08	1.16437	1.15877	1.19809	1.17129	1.13937	1.17867
2016-03-08 01:00:00	1.00356	1.00747	0.994584	1.00357	0.978144	1.01771
2016-03-08 02:00:00	1.46979	1.44474	1.48553	1.44699	1.44651	1.4845
2016-03-08 03:00:00	0.960974	0.953897	0.939796	0.960282	0.934503	0.975291
2016-03-08 04:00:00	0.455326	0.46508	0.558744	0.483778	0.431438	0.470952
2016-03-08 05:00:00	0.403881	0.417199	0.532457	0.432618	0.380153	0.419667
2016-03-08 06:00:00	0.685537	0.681929	0.742224	0.703563	0.660029	0.700821
2016-03-08 07:00:00	0.533123	0.531408	0.608655	0.556027	0.507804	0.548519
2016-03-08 08:00:00	0.724366	0.712409	0.782937	0.748741	0.697998	0.739065
2016-03-08 09:00:00	0.615377	0.605829	0.659877	0.635904	0.589176	0.630323
2016-03-08 10:00:00	0.88706	0.856756	0.936752	0.88858	0.859823	0.901325
2016-03-08 11:00:00	0.897987	0.855325	0.917791	0.884575	0.87015	0.91212
2016-03-08 12:00:00	1.30069	1.20899	1.30124	1.25033	1.27425	1.31465
2016-03-08 13:00:00	0.745776	0.702737	0.78605	0.692275	0.719096	0.761342
2016-03-08 14:00:00	0.57778	0.557963	0.658381	0.53285	0.553724	0.593842
2016-03-08 15:00:00	0.0595472	0.0924541	0.302028	0.0818547	0.0421298	0.076871
2016-03-08 16:00:00	0.154016	0.185814	0.348271	0.160082	0.134633	0.170946
2016-03-08 17:00:00	0.0703622	0.123377	0.311723	0.0863453	0.0519944	0.0879098
2016-03-08 18:00:00	0.0612358	0.12105	0.297299	0.0885654	0.0415962	0.0785816
2016-03-08 19:00:00	0.208756	0.250275	0.409834	0.221735	0.185963	0.225105
2016-03-08 20:00:00	0.251249	0.29316	0.439938	0.27828	0.227476	0.267377
2016-03-08 21:00:00	0.414517	0.451066	0.542681	0.437048	0.38782	0.429819
2016-03-08 22:00:00	0.509398	0.526211	0.608547	0.506997	0.48234	0.52473
2016-03-08 23:00:00	0.636972	0.653451	0.684985	0.633502	0.61018	0.651386
2016-03-09	0.726818	0.71836	0.758172	0.716098	0.702689	0.741386
2016-03-09 01:00:00	1.03237	0.995763	1.07462	1.00722	1.0064	1.04682
2016-03-09 02:00:00	0.981958	0.947815	1.00256	0.966726	0.955634	0.996415
2016-03-09 03:00:00	0.763044	0.756103	0.847796	0.781403	0.737353	0.777758
2016-03-09 04:00:00	0.379511	0.400906	0.51916	0.423867	0.356212	0.395429
2016-03-09 05:00:00	0.381829	0.397801	0.519816	0.4289	0.358243	0.397752
2016-03-09 06:00:00	0.391462	0.404748	0.530852	0.437224	0.367591	0.407321
2016-03-09 07:00:00	0.445551	0.451573	0.560612	0.486283	0.420989	0.461176
2016-03-09 08:00:00	0.446437	0.449557	0.563084	0.48803	0.421578	0.462036
2016-03-09 09:00:00	0.668057	0.662599	0.731759	0.706602	0.641301	0.682874
2016-03-09 10:00:00	0.585003	0.581539	0.640962	0.623389	0.558507	0.600163
2016-03-09 11:00:00	0.883128	0.872957	0.940784	0.910369	0.855705	0.897978
2016-03-09 12:00:00	1.23772	1.20921	1.27307	1.24575	1.21225	1.25218
2016-03-09 13:00:00	0.400552	0.405746	0.563308	0.445683	0.376481	0.416376
2016-03-09 14:00:00	0.127261	0.149387	0.343309	0.187634	0.106395	0.144528
2016-03-09 15:00:00	0.0884481	0.121197	0.312874	0.149503	0.0679367	0.105933
2016-03-09 16:00:00	0.0603014	0.103163	0.298217	0.125082	0.0400137	0.0779408
2016-03-09 17:00:00	0.338216	0.361544	0.494151	0.378475	0.315197	0.35419
2016-03-09 18:00:00	0.100344	0.146204	0.316267	0.156512	0.0789394	0.117527
2016-03-09 19:00:00	0.506397	0.523609	0.616855	0.499541	0.480758	0.522148
2016-03-09 20:00:00	0.675979	0.685623	0.717905	0.667345	0.649604	0.69128
2016-03-09 21:00:00	0.408643	0.43826	0.524109	0.442704	0.382398	0.424211
2016-03-09 22:00:00	0.450322	0.48266	0.545232	0.492974	0.422644	0.465561
2016-03-09 23:00:00	1.01791	0.994044	1.05107	1.0177	0.988367	1.03196
2016-03-10	0.930603	0.92241	0.959246	0.925548	0.905136	0.945012
2016-03-10 01:00:00	0.899631	0.901471	0.881156	0.894952	0.873155	0.915326
2016-03-10 02:00:00	0.742366	0.739253	0.738495	0.764701	0.716312	0.757459
2016-03-10 03:00:00	0.518939	0.519417	0.582841	0.557208	0.493596	0.534423
2016-03-10 04:00:00	0.399069	0.403362	0.533541	0.447494	0.374666	0.415043
2016-03-10 05:00:00	0.454375	0.452733	0.561541	0.502975	0.430027	0.470114
2016-03-10 06:00:00	0.611242	0.587649	0.675817	0.672628	0.585632	0.626182
2016-03-10 07:00:00	0.465225	0.458827	0.572134	0.499816	0.440617	0.481187
2016-03-10 08:00:00	0.395988	0.392981	0.524148	0.430834	0.371233	0.412129
2016-03-10 09:00:00	0.423047	0.414737	0.543269	0.467408	0.397913	0.438879
2016-03-10 10:00:00	0.325236	0.327136	0.498204	0.374955	0.300373	0.34135
2016-03-10 11:00:00	0.391999	0.386785	0.52814	0.440055	0.366677	0.407918
2016-03-10 12:00:00	0.841274	0.80189	0.961689	0.856532	0.814746	0.855922
2016-03-10 13:00:00	0.946054	0.920127	0.935225	0.935607	0.919966	0.962093
2016-03-10 14:00:00	0.992272	0.966937	0.92778	0.969894	0.965363	1.008
2016-03-10 15:00:00	0.329284	0.330665	0.474454	0.361578	0.305328	0.345548
2016-03-10 16:00:00	0.291064	0.301722	0.450315	0.332144	0.267016	0.30725
2016-03-10 17:00:00	0.298658	0.312064	0.459196	0.340374	0.274463	0.314787
2016-03-10 18:00:00	0.325549	0.342105	0.489963	0.363051	0.301086	0.341493
2016-03-10 19:00:00	0.629146	0.631533	0.716067	0.641186	0.603355	0.643841
2016-03-10 20:00:00	0.794162	0.79778	0.792173	0.797684	0.767802	0.809242
2016-03-10 21:00:00	0.688942	0.70113	0.755105	0.70043	0.662115	0.703691
2016-03-10 22:00:00	0.709012	0.726987	0.766117	0.722317	0.681857	0.723645
2016-03-10 23:00:00	0.936764	0.945876	0.976905	0.948108	0.910441	0.950607
2016-03-11	0.453586	0.467698	0.559342	0.502127	0.430393	0.469289
2016-03-11 01:00:00	0.449503	0.465737	0.543878	0.497337	0.425907	0.465193
2016-03-11 02:00:00	0.675814	0.676924	0.70468	0.687535	0.651622	0.690612
2016-03-11 03:00:00	0.783637	0.788596	0.80864	0.790887	0.758199	0.798578
2016-03-11 04:00:00	0.445542	0.445275	0.55244	0.482514	0.42097	0.461641
2016-05-20 05:00:00	0.475334	0.484833	0.553459	0.503403	0.45046	0.49066
2016-05-20 06:00:00	0.457087	0.471711	0.544201	0.483227	0.43147	0.472404
2016-05-20 07:00:00	0.510597	0.509988	0.574631	0.542949	0.485192	0.525789
2016-05-20 08:00:00	0.481241	0.488196	0.561535	0.501574	0.456204	0.496496
2016-05-20 09:00:00	0.443506	0.450757	0.553901	0.458279	0.418029	0.458899
2016-05-20 10:00:00	0.58414	0.574293	0.631208	0.593957	0.558306	0.599526
2016-05-20 11:00:00	0.801738	0.779695	0.877658	0.773465	0.775853	0.816181
2016-05-20 12:00:00	0.507664	0.510145	0.607774	0.504596	0.483026	0.522777
2016-05-20 13:00:00	0.378373	0.379021	0.526449	0.388502	0.354942	0.394069
2016-05-20 14:00:00	0.422471	0.425393	0.542406	0.433904	0.39848	0.438008
2016-05-20 15:00:00	0.827074	0.829767	0.894877	0.845639	0.800986	0.841122
2016-05-20 16:00:00	0.38793	0.396857	0.477277	0.415278	0.363782	0.403915
2016-05-20 17:00:00	0.268239	0.288348	0.456926	0.294769	0.244887	0.2847
2016-05-20 18:00:00	0.128779	0.17274	0.369095	0.171526	0.106993	0.145714
2016-05-20 19:00:00	0.836533	0.811481	0.841614	0.81884	0.807435	0.850229
2016-05-20 20:00:00	0.793124	0.766698	0.829953	0.797369	0.762798	0.806523
2016-05-20 21:00:00	0.390368	0.411683	0.50931	0.436759	0.363864	0.406361
2016-05-20 22:00:00	0.408157	0.430835	0.519071	0.459608	0.380668	0.423866
2016-05-20 23:00:00	0.352065	0.384939	0.505726	0.41161	0.324584	0.367743
2016-05-21	0.478706	0.485506	0.56755	0.542108	0.45461	0.494296
2016-05-21 01:00:00	0.497685	0.505197	0.579245	0.559216	0.473213	0.513174
2016-05-21 02:00:00	0.725662	0.707854	0.728198	0.789865	0.699639	0.740518
2016-05-21 03:00:00	0.492955	0.499231	0.57949	0.536819	0.468531	0.508581
2016-05-21 04:00:00	0.353817	0.372155	0.503908	0.399869	0.330254	0.36975
2016-05-21 05:00:00	0.529348	0.532532	0.596394	0.567101	0.504455	0.544968
2016-05-21 06:00:00	0.419728	0.429754	0.53436	0.460347	0.395242	0.435404
2016-05-21 07:00:00	0.388084	0.400302	0.517944	0.427915	0.363463	0.403843
2016-05-21 08:00:00	0.446585	0.449429	0.548433	0.488842	0.421336	0.462142
2016-05-21 09:00:00	0.369941	0.385173	0.511064	0.408892	0.345018	0.385705
2016-05-21 10:00:00	0.403301	0.412607	0.526678	0.443374	0.378159	0.418984
2016-05-21 11:00:00	0.364492	0.380802	0.502472	0.402773	0.339244	0.380315
2016-05-21 12:00:00	0.298863	0.316684	0.462462	0.327554	0.274746	0.315185
2016-05-21 13:00:00	0.316534	0.327767	0.473232	0.348697	0.292895	0.332858
2016-05-21 14:00:00	0.282106	0.303306	0.456843	0.319425	0.257859	0.298288
2016-05-21 15:00:00	0.260791	0.285303	0.431277	0.290823	0.236851	0.277298
2016-05-21 16:00:00	0.262279	0.284749	0.435542	0.306781	0.23845	0.278569
2016-05-21 17:00:00	0.230082	0.248683	0.411598	0.277853	0.205279	0.246553
2016-05-21 18:00:00	0.129616	0.175758	0.368902	0.180768	0.106418	0.14651
2016-05-21 19:00:00	0.305936	0.33276	0.461442	0.353968	0.280089	0.321939
2016-05-21 20:00:00	0.452537	0.466038	0.541672	0.486708	0.425135	0.468312
2016-05-21 21:00:00	0.287815	0.323613	0.457493	0.334094	0.261588	0.303841
2016-05-21 22:00:00	0.36556	0.392736	0.502973	0.414368	0.338435	0.381201
2016-05-21 23:00:00	0.479186	0.495708	0.569636	0.519044	0.45125	0.494654
2016-05-22	0.334069	0.357335	0.497248	0.39586	0.311403	0.350129
2016-05-22 01:00:00	0.402749	0.417412	0.526922	0.459226	0.379181	0.418578
2016-05-22 02:00:00	0.41818	0.431449	0.534583	0.473315	0.394339	0.43394
2016-05-22 03:00:00	0.346869	0.367577	0.501637	0.396673	0.323609	0.362804
2016-05-22 04:00:00	0.395356	0.407472	0.522088	0.439137	0.371742	0.411153
2016-05-22 05:00:00	0.443477	0.449812	0.550036	0.481206	0.419239	0.459183
2016-05-22 06:00:00	0.455539	0.459581	0.556742	0.481837	0.430585	0.471393
2016-05-22 07:00:00	0.411474	0.417852	0.532242	0.454208	0.386679	0.427173
2016-05-22 08:00:00	0.435706	0.43704	0.548045	0.472377	0.410754	0.45129
2016-05-22 09:00:00	0.333603	0.346118	0.494055	0.368356	0.309018	0.349467
2016-05-22 10:00:00	0.38208	0.384159	0.516238	0.420113	0.356979	0.397876
2016-05-22 11:00:00	0.354614	0.363375	0.486424	0.385235	0.329564	0.370481
2016-05-22 12:00:00	0.270267	0.285984	0.444499	0.305855	0.246187	0.286454
2016-05-22 13:00:00	0.359517	0.363914	0.494717	0.390953	0.334892	0.375654
2016-05-22 14:00:00	0.326112	0.3328	0.471415	0.353967	0.301639	0.342371
2016-05-22 15:00:00	0.138181	0.168326	0.377248	0.18475	0.115745	0.155106
2016-05-22 16:00:00	0.195603	0.220025	0.400898	0.239546	0.172725	0.212266
2016-05-22 17:00:00	0.0956503	0.136783	0.331596	0.151132	0.0739671	0.112888
2016-05-22 18:00:00	0.0858536	0.137009	0.323266	0.138927	0.0643894	0.10317
2016-05-22 19:00:00	0.219392	0.251454	0.407506	0.264558	0.196041	0.236311
2016-05-22 20:00:00	0.187216	0.229271	0.397967	0.242551	0.163585	0.203844
2016-05-22 21:00:00	0.226699	0.268874	0.422157	0.278939	0.202227	0.243184
2016-05-22 22:00:00	0.416104	0.440361	0.532193	0.463509	0.389172	0.431781
2016-05-22 23:00:00	0.493979	0.508092	0.595356	0.533398	0.466157	0.508976
2016-05-23	0.907989	0.87757	0.966712	0.913506	0.882803	0.922474
2016-05-23 01:00:00	0.994354	0.965828	0.965539	1.00286	0.96927	1.0091
2016-05-23 02:00:00	0.527776	0.543408	0.575916	0.55781	0.503426	0.542663
2016-05-23 03:00:00	0.461327	0.475202	0.552266	0.510247	0.436972	0.476821
2016-05-23 04:00:00	0.434734	0.440213	0.540149	0.466227	0.410545	0.450257
2016-05-23 05:00:00	0.39667	0.406691	0.520408	0.419458	0.372559	0.412204
2016-05-23 06:00:00	0.457753	0.467499	0.550276	0.502957	0.432756	0.473232
2016-05-23 07:00:00	0.437161	0.448214	0.542996	0.472023	0.412202	0.45288
2016-05-23 08:00:00	0.511515	0.514782	0.580867	0.545688	0.486006	0.527053
2016-05-23 09:00:00	0.736183	0.718629	0.771091	0.759315	0.709918	0.750782
2016-05-23 10:00:00	0.838026	0.797572	0.937794	0.850621	0.809544	0.852383
2016-05-23 11:00:00	0.814124	0.772354	0.90805	0.822211	0.786712	0.828633
2016-05-23 12:00:00	0.507532	0.511001	0.593356	0.533889	0.481979	0.522605
2016-05-23 13:00:00	0.422613	0.426166	0.533375	0.448482	0.39838	0.438346
2016-05-23 14:00:00	0.333398	0.347059	0.45532	0.352714	0.309511	0.34973
2016-05-23 15:00:00	0.184753	0.221241	0.416737	0.223846	0.162773	0.201425
2016-05-23 16:00:00	0.644269	0.626872	0.709915	0.652444	0.617013	0.659208
2016-05-23 17:00:00	0.164264	0.205787	0.358386	0.212326	0.141132	0.181213
2016-05-23 18:00:00	0.193378	0.232633	0.41534	0.244183	0.169844	0.210017
2016-05-23 19:00:00	0.369432	0.391903	0.486084	0.397284	0.343773	0.385337
2016-05-23 20:00:00	0.281167	0.320096	0.435805	0.316888	0.255553	0.29701
2016-05-23 21:00:00	0.500058	0.515497	0.56916	0.532606	0.472382	0.515522
2016-05-23 22:00:00	0.750068	0.747641	0.80537	0.77301	0.72052	0.764304
2016-05-23 23:00:00	0.64873	0.653896	0.728964	0.693849	0.619882	0.66342
2016-05-24	0.918254	0.898636	0.936766	0.948338	0.891636	0.932821
2016-05-24 01:00:00	1.457	1.41989	1.38481	1.45212	1.43095	1.47175
2016-05-24 02:00:00	0.945161	0.928844	0.923017	0.964119	0.918643	0.960284
2016-05-24 03:00:00	1.42743	1.3684	1.35571	1.37878	1.39911	1.44176
2016-05-24 04:00:00	1.01853	0.986835	0.977334	1.00078	0.991149	1.03428
2016-05-24 05:00:00	0.451911	0.464235	0.54719	0.493688	0.426838	0.46767
2016-05-24 06:00:00	0.40512	0.420139	0.524586	0.447573	0.380151	0.420934
2016-05-24 07:00:00	0.850641	0.825998	0.823962	0.874811	0.823339	0.865217
2016-05-24 08:00:00	0.449338	0.458414	0.539803	0.483604	0.423457	0.464688
2016-05-24 09:00:00	0.432688	0.435813	0.540006	0.483853	0.407291	0.448276
2016-05-24 10:00:00	0.356053	0.367058	0.505658	0.405949	0.331011	0.371902
2016-05-24 11:00:00	0.365939	0.374093	0.508009	0.414813	0.340579	0.381754
2016-05-24 12:00:00	0.359947	0.366096	0.489319	0.406633	0.334949	0.375935
2016-05-24 13:00:00	0.377006	0.38207	0.497553	0.409059	0.351289	0.393145
2016-05-24 14:00:00	0.385152	0.390811	0.51057	0.429888	0.359356	0.401032
2016-05-24 15:00:00	0.278595	0.296523	0.436604	0.324262	0.254017	0.295019
2016-05-24 16:00:00	0.278932	0.300062	0.44226	0.325642	0.253758	0.295223
2016-05-24 17:00:00	0.341985	0.357887	0.479019	0.390744	0.315684	0.357876
2016-05-24 18:00:00	0.254193	0.288765	0.437239	0.301746	0.22847	0.270336
2016-05-24 19:00:00	0.307203	0.332189	0.458033	0.357823	0.281579	0.323215
2016-05-24 20:00:00	0.294364	0.317027	0.445415	0.333498	0.26896	0.310512
2016-05-24 21:00:00	0.377467	0.394265	0.494709	0.413161	0.351224	0.393485
2016-05-24 22:00:00	0.422588	0.442945	0.529937	0.469107	0.395812	0.438166
2016-05-24 23:00:00	0.37459	0.407666	0.51002	0.419369	0.347422	0.390136
2016-05-25	0.540686	0.544012	0.624662	0.597646	0.517468	0.556065
2016-05-25 01:00:00	0.495442	0.502867	0.574874	0.55793	0.471912	0.510833
2016-05-25 02:00:00	0.601807	0.590487	0.65452	0.678827	0.576862	0.616644
2016-05-25 03:00:00	0.36669	0.38799	0.508192	0.414554	0.343431	0.382545
2016-05-25 04:00:00	0.335946	0.361705	0.496083	0.391678	0.312217	0.351852
2016-05-25 05:00:00	0.418878	0.429989	0.532594	0.476406	0.394465	0.434569
2016-05-25 06:00:00	0.39262	0.414423	0.521796	0.416765	0.367456	0.408427
2016-05-25 07:00:00	0.505194	0.48484	0.583914	0.499891	0.47942	0.520815
2016-05-25 08:00:00	0.427997	0.426152	0.552272	0.430892	0.403002	0.443414
2016-05-25 09:00:00	0.312599	0.328046	0.497542	0.316383	0.288369	0.328359
2016-05-25 10:00:00	0.467361	0.459283	0.570803	0.463072	0.441796	0.482857
2016-05-25 11:00:00	0.319574	0.323154	0.470205	0.323293	0.294889	0.33538
2016-05-25 12:00:00	0.270143	0.278984	0.451456	0.28098	0.246915	0.286189
2016-05-25 13:00:00	0.156573	0.174183	0.367191	0.194515	0.135579	0.1734
2016-05-25 14:00:00	0.0445389	0.0893261	0.288503	0.0872845	0.024919	0.0620388
2016-05-25 15:00:00	0.0660867	0.113554	0.294877	0.119943	0.0460339	0.0835646
2016-05-25 16:00:00	0.0875178	0.138489	0.309565	0.142798	0.066858	0.105109
2016-05-25 17:00:00	0.0567983	0.113011	0.306137	0.109861	0.0365638	0.0746761
2016-05-25 18:00:00	0.0731344	0.132149	0.298644	0.133935	0.0525913	0.0905206
2016-05-25 19:00:00	0.172084	0.211444	0.378708	0.219574	0.14941	0.189112
2016-05-25 20:00:00	0.178158	0.222248	0.389259	0.239696	0.155082	0.194818
2016-05-25 21:00:00	0.32854	0.361023	0.486033	0.387962	0.302589	0.344358
2016-05-25 22:00:00	0.266539	0.315872	0.461632	0.328303	0.240785	0.282514
2016-05-25 23:00:00	0.479046	0.489767	0.577218	0.518643	0.452112	0.494409
2016-05-26	0.461491	0.471037	0.566821	0.49415	0.439509	0.476944
2016-05-26 01:00:00	0.658309	0.644126	0.674972	0.694799	0.634209	0.673164
2016-05-26 02:00:00	0.335725	0.360552	0.501421	0.377	0.313481	0.351707
2016-05-26 03:00:00	0.358045	0.386956	0.503057	0.4042	0.335117	0.374108
2016-05-26 04:00:00	0.388982	0.411702	0.521333	0.448862	0.365736	0.40479
2016-05-26 05:00:00	0.302683	0.33602	0.485213	0.350205	0.279846	0.318745
2016-05-26 06:00:00	0.380817	0.400108	0.518732	0.430369	0.357163	0.39663
2016-05-26 07:00:00	0.355581	0.376062	0.509673	0.402667	0.331813	0.371471
2016-05-26 08:00:00	0.394744	0.410357	0.528812	0.42713	0.37053	0.410703
2016-05-26 09:00:00	0.455394	0.46427	0.563429	0.489089	0.430428	0.47124
2016-05-26 10:00:00	0.278638	0.310454	0.472823	0.32402	0.254039	0.294813
2016-05-26 11:00:00	0.386087	0.398988	0.505304	0.421418	0.361122	0.402136
2016-05-26 12:00:00	0.30075	0.32261	0.462864	0.345549	0.276358	0.316948
2016-05-26 13:00:00	0.174543	0.207456	0.382515	0.229822	0.152209	0.191377
2016-05-26 14:00:00	0.0967228	0.138794	0.326125	0.160091	0.0759824	0.114098
2016-05-26 15:00:00	0.0688536	0.116921	0.315412	0.129962	0.0481693	0.0865696
2016-05-26 16:00:00	0.237476	0.263361	0.406346	0.289206	0.214253	0.254467
2016-05-26 17:00:00	0.136566	0.179504	0.356489	0.202519	0.114245	0.153691
2016-05-26 18:00:00	0.190233	0.226774	0.404109	0.246873	0.166568	0.207229
2016-05-26 19:00:00	0.276045	0.305991	0.44297	0.339392	0.251333	0.292391
2016-05-26 20:00:00	0.218756	0.259976	0.415457	0.276162	0.194237	0.235453
2016-05-26 21:00:00	0.377861	0.405868	0.503185	0.429569	0.351281	0.393803
2016-05-26 22:00:00	0.43106	0.457248	0.537014	0.484293	0.403534	0.446496
2016-05-26 23:00:00	0.373726	0.410288	0.512615	0.418237	0.346756	0.389537
2016-05-27	0.416508	0.440212	0.537412	0.473785	0.39414	0.43236
2016-05-27 01:00:00	0.435794	0.461496	0.537443	0.480315	0.412247	0.451501
2016-05-27 02:00:00	0.387227	0.415296	0.519291	0.436623	0.363944	0.403038
2016-05-27 03:00:00	0.359859	0.390696	0.509466	0.406632	0.336346	0.375764
2016-05-27 04:00:00	0.331449	0.358836	0.495533	0.378652	0.308181	0.34745
2016-05-27 05:00:00	0.593534	0.601594	0.62595	0.629918	0.567906	0.609024
2016-05-27 06:00:00	0.383859	0.397693	0.524874	0.42569	0.359471	0.399997
2016-05-27 07:00:00	0.437011	0.441315	0.547601	0.494376	0.411655	0.452815
2016-05-27 08:00:00	0.477133	0.481528	0.560924	0.534304	0.451157	0.492727
2016-05-27 09:00:00	0.399195	0.405637	0.524701	0.448437	0.373753	0.415186
2016-05-27 10:00:00	0.373374	0.376355	0.510212	0.431769	0.348286	0.389262
2016-05-27 11:00:00	0.317426	0.329152	0.466685	0.371438	0.292487	0.33346
2016-05-27 12:00:00	0.294437	0.306084	0.459392	0.353232	0.270015	0.310701
2016-05-27 13:00:00	0.171963	0.195831	0.386072	0.232541	0.149498	0.188872
2016-05-27 14:00:00	0.269602	0.279162	0.425018	0.312779	0.245957	0.286412
2016-05-27 15:00:00	0.359399	0.363045	0.490081	0.399687	0.334537	0.375772
2016-05-27 16:00:00	0.0944489	0.134062	0.344426	0.149159	0.0729237	0.111843
2016-05-27 17:00:00	0.28108	0.298197	0.434324	0.327925	0.257158	0.297603
2016-05-27 18:00:00	0.24109	0.265491	0.414239	0.284887	0.217446	0.257811
2016-05-27 19:00:00	0.187484	0.224491	0.400407	0.240775	0.164094	0.204207
2016-05-27 20:00:00	0.279669	0.306805	0.442035	0.332991	0.255592	0.29616
2016-05-27 21:00:00	0.393913	0.415563	0.498169	0.435572	0.36747	0.409668
2016-05-27 22:00:00	0.391638	0.416214	0.519617	0.445276	0.365437	0.407286
2016-05-27 23:00:00	0.396636	0.425026	0.524509	0.446272	0.370048	0.412322
2016-05-28	0.519468	0.529675	0.581028	0.574024	0.496145	0.535098
2016-05-28 01:00:00	0.388766	0.409719	0.520249	0.454709	0.366043	0.404606
2016-05-28 02:00:00	0.320036	0.351831	0.495098	0.384418	0.297149	0.336058
2016-05-28 03:00:00	0.482613	0.494772	0.56727	0.549246	0.458044	0.49809
2016-05-28 04:00:00	0.443308	0.455809	0.552584	0.492198	0.418494	0.459327
2016-05-28 05:00:00	0.431861	0.444461	0.545211	0.482976	0.407206	0.447755
2016-05-28 06:00:00	0.54223	0.544023	0.598075	0.590506	0.516863	0.55778
2016-05-28 07:00:00	0.353507	0.371771	0.505468	0.407547	0.328943	0.369538
2016-05-28 08:00:00	0.434245	0.439856	0.546543	0.492811	0.409148	0.449965
2016-05-28 09:00:00	0.402931	0.409671	0.526212	0.452064	0.377637	0.418576
2016-05-28 10:00:00	0.353088	0.361639	0.503982	0.406534	0.328353	0.369019
2016-05-28 11:00:00	0.344194	0.353584	0.497606	0.397645	0.319487	0.360161
2016-05-28 12:00:00	0.411181	0.413361	0.507996	0.450795	0.385855	0.427164
2016-05-28 13:00:00	0.285378	0.295477	0.444322	0.332012	0.262503	0.30211
2016-05-28 14:00:00	0.0607689	0.105029	0.308666	0.125189	0.0406509	0.0783214
2016-05-28 15:00:00	0.0826931	0.124242	0.30833	0.146268	0.0628806	0.100127
2016-05-28 16:00:00	0.172372	0.208716	0.370448	0.228892	0.150502	0.189712
2016-05-28 17:00:00	0.138058	0.17621	0.353408	0.194426	0.11614	0.155278
2016-05-28 18:00:00	0.182859	0.219798	0.372566	0.241784	0.160744	0.199955
2016-05-28 19:00:00	0.178362	0.218333	0.378208	0.235337	0.155576	0.195112
2016-05-28 20:00:00	0.273547	0.304549	0.437212	0.329723	0.249785	0.290064
2016-05-28 21:00:00	0.320596	0.350738	0.463829	0.370466	0.295681	0.336733
2016-05-28 22:00:00	0.446223	0.468405	0.52971	0.496718	0.419818	0.461746
2016-05-28 23:00:00	0.472056	0.49602	0.566205	0.523551	0.445331	0.487586
2016-05-29	0.359009	0.389637	0.508911	0.410883	0.337815	0.375037
2016-05-29 01:00:00	0.560739	0.572626	0.607991	0.612861	0.537551	0.576109
2016-05-29 02:00:00	0.382549	0.411489	0.52066	0.421901	0.360515	0.398578
2016-05-29 03:00:00	0.415121	0.438287	0.5334	0.462127	0.391764	0.430807
2016-05-29 04:00:00	0.343762	0.373087	0.503434	0.382024	0.320645	0.359709
2016-05-29 05:00:00	0.565294	0.564429	0.613682	0.589283	0.540036	0.580839
2016-05-29 06:00:00	0.458859	0.464843	0.56604	0.477908	0.434266	0.474633
2016-05-29 07:00:00	0.444457	0.450032	0.564652	0.44691	0.419855	0.460212
2016-05-29 08:00:00	0.547236	0.540222	0.605407	0.568267	0.52133	0.56252
2016-05-29 09:00:00	0.3357	0.362795	0.500555	0.364822	0.311086	0.351722
2016-05-29 10:00:00	0.451778	0.460724	0.556973	0.48166	0.426072	0.467552
2016-05-29 11:00:00	0.456849	0.461856	0.536019	0.481388	0.431783	0.472535
2016-05-29 12:00:00	0.301929	0.321187	0.463155	0.340574	0.278274	0.318133
2016-05-29 13:00:00	0.216946	0.244066	0.401784	0.262011	0.195236	0.233756
2016-05-29 14:00:00	0.174779	0.213503	0.363116	0.211713	0.153691	0.191824
2016-05-29 15:00:00	0.154734	0.1939	0.366434	0.211202	0.133918	0.171639
2016-05-29 16:00:00	0.099805	0.148091	0.327835	0.15873	0.0791206	0.11697
2016-05-29 17:00:00	0.186097	0.223385	0.373417	0.234108	0.164483	0.203199
2016-05-29 18:00:00	0.49397	0.502632	0.556711	0.533166	0.467695	0.509586
2016-05-29 19:00:00	0.310593	0.343775	0.459575	0.354786	0.285566	0.326726
2016-05-29 20:00:00	0.254073	0.297515	0.425868	0.304093	0.230882	0.270482
2016-05-29 21:00:00	0.382664	0.413861	0.500463	0.427886	0.356676	0.398595
2016-05-29 22:00:00	0.409046	0.442482	0.520888	0.463905	0.382781	0.424619
2016-05-29 23:00:00	0.415781	0.45062	0.53548	0.462252	0.389042	0.431403
2016-05-30	0.517451	0.538685	0.586127	0.575969	0.49434	0.532945
2016-05-30 01:00:00	0.41429	0.44443	0.538246	0.46692	0.392434	0.430039
2016-05-30 02:00:00	0.411054	0.441764	0.533842	0.452107	0.388845	0.426928
2016-05-30 03:00:00	0.513096	0.533359	0.5939	0.556491	0.489538	0.528356
2016-05-30 04:00:00	0.314007	0.350449	0.49372	0.35469	0.291505	0.32996
2016-05-30 05:00:00	0.447455	0.468469	0.560278	0.48207	0.423668	0.463072
2016-05-30 06:00:00	0.483956	0.502796	0.585989	0.502735	0.459035	0.499732
2016-05-30 07:00:00	0.503508	0.520901	0.586696	0.528911	0.478186	0.518959
2016-05-30 08:00:00	0.477779	0.492107	0.572739	0.509596	0.453229	0.493467
2016-05-30 09:00:00	0.36253	0.374725	0.508129	0.411507	0.337546	0.378507
2016-05-30 10:00:00	0.510695	0.507915	0.583467	0.561465	0.484647	0.526055
2016-05-30 11:00:00	0.368929	0.389342	0.511927	0.407221	0.342926	0.384934
2016-05-30 12:00:00	0.410014	0.422398	0.531123	0.445973	0.383651	0.425882
2016-05-30 13:00:00	0.353622	0.36638	0.484215	0.394379	0.328198	0.369556
2016-05-30 14:00:00	0.25255	0.274873	0.43073	0.2907	0.228645	0.269188
2016-05-30 15:00:00	0.130118	0.168785	0.35065	0.19043	0.108279	0.147215
2016-05-30 16:00:00	0.169255	0.203454	0.37483	0.225232	0.145952	0.185998
2016-05-30 17:00:00	0.102827	0.148301	0.333452	0.165472	0.0810094	0.120162
2016-05-30 18:00:00	0.160909	0.201898	0.369059	0.213324	0.13831	0.178197
2016-05-30 19:00:00	0.26946	0.298014	0.441244	0.313624	0.245137	0.286076
2016-05-30 20:00:00	0.292562	0.325038	0.443539	0.349735	0.268233	0.308748
2016-05-30 21:00:00	0.29895	0.337239	0.464055	0.347179	0.273748	0.315263
2016-05-30 22:00:00	0.423038	0.453699	0.529428	0.48241	0.39661	0.438621
2016-05-30 23:00:00	0.476182	0.50375	0.557348	0.523954	0.448682	0.491528
2016-05-31	0.415548	0.442984	0.536005	0.478612	0.39331	0.431273
2016-05-31 01:00:00	0.425517	0.452646	0.542168	0.479995	0.403195	0.441313
2016-05-31 02:00:00	0.507391	0.525956	0.577473	0.55352	0.484136	0.522925
2016-05-31 03:00:00	0.395845	0.418766	0.526734	0.449189	0.373485	0.411543
2016-05-31 04:00:00	0.313368	0.346342	0.501256	0.341733	0.291873	0.329213
2016-05-31 05:00:00	0.427873	0.443285	0.552655	0.456086	0.405284	0.443244
2016-05-31 06:00:00	0.490003	0.498478	0.580957	0.501966	0.466159	0.505368
2016-05-31 07:00:00	0.508285	0.511982	0.602041	0.516	0.484372	0.523846
2016-05-31 08:00:00	0.425936	0.435907	0.554978	0.44491	0.402363	0.441548
2016-05-31 09:00:00	0.495657	0.495999	0.581439	0.512091	0.47114	0.511127
2016-05-31 10:00:00	0.407589	0.413184	0.539144	0.450458	0.383532	0.423305
2016-05-31 11:00:00	0.284207	0.310665	0.449366	0.332659	0.260605	0.300468
2016-05-31 12:00:00	0.469902	0.466962	0.547401	0.506088	0.445281	0.485536
2016-05-31 13:00:00	0.137594	0.179691	0.372498	0.159433	0.117718	0.154396
2016-05-31 14:00:00	0.0668044	0.125926	0.305205	0.0941362	0.0482745	0.0840213
2016-05-31 15:00:00	0.143556	0.192346	0.34068	0.174638	0.123409	0.160343
2016-05-31 16:00:00	0.0770258	0.140241	0.306279	0.102811	0.0573419	0.0943242
2016-05-31 17:00:00	0.148938	0.202104	0.364475	0.185277	0.128586	0.166012
2016-05-31 18:00:00	0.129606	0.194424	0.352503	0.168467	0.1092	0.14657
2016-05-31 19:00:00	0.450678	0.4535	0.566194	0.502071	0.424908	0.46564
2016-05-31 20:00:00	0.180465	0.228059	0.395914	0.210474	0.158043	0.197124
2016-05-31 21:00:00	0.309534	0.347817	0.47306	0.345703	0.28403	0.325774
2016-05-31 22:00:00	0.523205	0.546247	0.57645	0.571149	0.495962	0.538522
2016-05-31 23:00:00	0.554008	0.577727	0.639695	0.596335	0.526592	0.569043
2016-06-01	1.24159	1.27252	1.2696	1.23789	1.21855	1.25611
2016-06-01 01:00:00	1.08948	1.10157	1.04773	1.09789	1.065	1.1036
2016-06-01 02:00:00	1.02899	1.04094	0.975517	1.02307	1.00353	1.04431
2016-06-01 03:00:00	0.531803	0.554054	0.60935	0.55622	0.507952	0.546784
2016-06-01 04:00:00	0.391208	0.415745	0.523063	0.431187	0.367992	0.406858
2016-06-01 05:00:00	0.498948	0.514887	0.57667	0.534872	0.474092	0.514196
2016-06-01 06:00:00	0.335868	0.36176	0.500026	0.369385	0.312132	0.351771
2016-06-01 07:00:00	0.536148	0.543695	0.604917	0.564232	0.511635	0.55171
2016-06-01 08:00:00	0.520102	0.524736	0.582913	0.544997	0.495021	0.535581
2016-06-01 09:00:00	0.444261	0.450989	0.55015	0.486052	0.419774	0.459661
2016-06-01 10:00:00	0.869031	0.845932	0.908251	0.904438	0.843372	0.883177
2016-06-01 11:00:00	1.14376	1.09285	1.13995	1.14412	1.11699	1.15787
2016-06-01 12:00:00	0.63135	0.632517	0.675384	0.645907	0.605794	0.645982
2016-06-01 13:00:00	0.164879	0.193681	0.395202	0.205539	0.143775	0.181258
2016-06-01 14:00:00	0.366793	0.378836	0.509702	0.406184	0.344062	0.382415
2016-06-01 15:00:00	0.0688053	0.110198	0.337866	0.126185	0.0491685	0.086325
2016-06-01 16:00:00	0.0567828	0.104954	0.32281	0.120075	0.0374653	0.0744355
2016-06-01 17:00:00	0.102623	0.148188	0.33659	0.153012	0.082648	0.12007
2016-06-01 18:00:00	0.215073	0.25247	0.381931	0.25215	0.193149	0.231614
2016-06-01 19:00:00	0.150055	0.199754	0.362099	0.199894	0.129402	0.166813
2016-06-01 20:00:00	0.206876	0.253569	0.405081	0.236639	0.184537	0.223513
2016-06-01 21:00:00	0.430809	0.469041	0.543136	0.470338	0.405913	0.44603
2016-06-01 22:00:00	0.514072	0.553358	0.611603	0.527234	0.488754	0.529274
2016-06-01 23:00:00	0.65031	0.684385	0.702634	0.667554	0.624245	0.664603
2016-06-02	1.16938	1.17347	1.24304	1.15901	1.14535	1.18412
2016-06-02 01:00:00	1.25297	1.25787	1.2218	1.22649	1.22846	1.26813
2016-06-02 02:00:00	1.20655	1.20321	1.11472	1.17545	1.18182	1.22158
2016-06-02 03:00:00	0.953309	0.944809	0.968445	0.945097	0.928096	0.967719
2016-06-02 04:00:00	0.333405	0.351469	0.503021	0.355453	0.310726	0.349155
2016-06-02 05:00:00	0.553929	0.562381	0.617703	0.593983	0.529241	0.569234
2016-06-02 06:00:00	0.318843	0.34027	0.490077	0.357953	0.295346	0.334761
2016-06-02 07:00:00	0.473211	0.480654	0.575582	0.508591	0.448653	0.488641
2016-06-02 08:00:00	0.46356	0.469399	0.563835	0.493619	0.438933	0.479158
2016-06-02 09:00:00	0.383746	0.392639	0.521025	0.415528	0.359344	0.399539
2016-06-02 10:00:00	0.438063	0.442606	0.551779	0.47354	0.413141	0.453666
2016-06-02 11:00:00	0.674572	0.644145	0.720986	0.661769	0.649242	0.688961
[truncated: 4,720 more rows]
